# Supplementary material
Source: Research Square preprint supplement (doi:10.21203/rs.3.rs-9990161/v1)
Supplement: Supplementary file 1 [file 5a0ce3d8e7cba32a22297fb9.xlsx]

## Sheet: Supplementary Table 1
Supplementary Table 1. Meta data of variables for each life-course domain used in H2O AutoML
Round	Module	Stacked Status	Variable Pair	Long Form Variable Name	Variable Label	Details	Coded Variable Name	Variable Type
Covariates
RS	Status and Descriptive	paired	sexrsp/ssbsex	z_sexrsp	RS Sex of participant	1: Male 2: Female	sex	Factor(Binary)
RA	IQ	paired	ghncr_bm/shncr_t	z_ghncr_bm	RA Centile rank based on national test takers for Henmon-Nelson test score from junior year, based on transformed raw score.		IQ	Continuous
R3	Summary, Status and Geography	paired	age75/age77	z_age75	R3 Participant's current age.		age_R3	Continuous
R4	Summary	paired	ra029re/sa029re	z_ra029re	R4 Age of respondent at time of phone interviewer.		age_R4	Continuous
R5	Summary	paired	ga003re/ca003re	z_ga003re	R5 Respondent's age at time of interview		age_R5	Continuous
R6	Summary	paired	ha003re/ka003re	z_ha003re	R6 Participant's age at time of 2011 in-person or telephone interview.		age_R6	Continuous
R4	Health	paired	mx011rec/nx025rec	z_mx011rec	R4 Body mass index based on respondent's weight and height.		BMI_R4	Continuous
R5	Health and Health Behaviors	paired	ix011rec/dx011rec	z_ix011rec	R5 Respondent's Body Mass Index based on their reported weight and height.		BMI_R5	Continuous
Economic stability
RA	Economic Imputations	paired	rr020rei1/sr020rei1	z_rr020rei1	RA IMPUTED Do you own your own home or are you renting?	1: Own Home 2: Rent Home 3: Lives with Parents 4: Lives With Children 5: Lives with Other Relatives 6: Lives with Other Non-Relatives 7: Lives in Church-Owned or Religious Organization Owned Home 8: Other	Home_own1_R4	Factor(Categorical)
RA	Economic Imputations	paired	rr021rei1/sr021rei1	z_rr021rei1	RA IMPUTED How much do you think your home would sell for now?		Home_value1_R4	Continuous
RA	Economic Imputations	paired	rr022rei1/sr022rei1	z_rr022rei1	RA IMPUTED How much, if anything, do you owe on your home?		Home_loan1_R4	Continuous
RA	Economic Imputations	paired	rr024rei1/sr024rei1	z_rr024rei1	RA IMPUTED Do you own any real estate other than a first home, business, or farm?	1: Yes 2: No	RealEstate_own1_R4	Factor(Binary)
RA	Economic Imputations	paired	rr025rei1/sr025rei1	z_rr025rei1	RA IMPUTED How much do you think this real estate that is not your first home, a business, or a farm would sell for now?		RealEstate_value1_R4	Continuous
RA	Economic Imputations	paired	rr026rei1/sr026rei1	z_rr026rei1	RA IMPUTED How much, if anything, do you owe on your real estate, that is not your first home, a business, or a farm?		RealEstate_loan1_R4	Continuous
RA	Economic Imputations	paired	rr028rei1/sr028rei1	z_rr028rei1	RA IMPUTED Do you own a business or farm?	1: Yes 2: No	Business_own1_R4	Factor(Binary)
RA	Economic Imputations	paired	rr029rei1/sr029rei1	z_rr029rei1	RA IMPUTED How much do you think your business or farm would sell for now?		Business_value1_R4	Continuous
RA	Economic Imputations	paired	rr030rei1/sr030rei1	z_rr030rei1	RA IMPUTED How much, if anything, do you owe on your business or farm?		Business_loan1_R4	Continuous
RA	Economic Imputations	paired	rr032rei1/sr032rei1	z_rr032rei1	RA IMPUTED Do you own any motor vehicles, including cars, trucks, campers, boats, and other RVs?	1: Yes 2: No	Vehicle_own1_R4	Factor(Binary)
RA	Economic Imputations	paired	rr033rei1/sr033rei1	z_rr033rei1	RA IMPUTED Altogether how much do you think these motor vehicles, including cars, trucks, campers, boats, and other RVs would sell for now?		Vehicle_value1_R4	Continuous
RA	Economic Imputations	paired	rr034rei1/sr034rei1	z_rr034rei1	RA IMPUTED How much, if anything, do you owe on these motor vehicles, including cars, trucks, campers, boats, and other RVs?		Vehicle_loan1_R4	Continuous
RA	Economic Imputations	paired	rr036rei1/sr036rei1	z_rr036rei1	RA IMPUTED Do you owe a total of $5,000 or more for anything other than mortgages, cars, trucks, campers, boats, other RVs, a business, a farm or real estate that we have already talked about?	1: Yes 2: No	OtherLoan_own1_R4	Factor(Binary)
RA	Economic Imputations	paired	rr037rei1/sr037rei1	z_rr037rei1	RA IMPUTED How much do you owe for anything other than mortgages, cars, trucks, campers, boats, other RVs, a business, a farm or real estate that we have already talked about? Direct report.		OtherLoan_value1_R4	Continuous
RA	Economic Imputations	paired	rr040rei1/sr040rei1	z_rr040rei1	RA IMPUTED Total value of respondent and spouse's savings.		Household_Savings1_R4	Continuous
RA	Economic Imputations	paired	rr041rei1/sr041rei1	z_rr041rei1	RA IMPUTED Total value of respondent and spouse's investments.		Household_Investments1_R4	Continuous
RA	Economic Imputations	paired	rp001rei1/sp001rei1	z_rp001rei1	RA IMPUTED Respondent's income from wages, salaries, commissions, and tips before taxes and other deductions in the last 12 months.		Personal_Wage1_R4	Continuous
RA	Economic Imputations	paired	rp002rei1/sp002rei1	z_rp002rei1	RA IMPUTED Does respondent have any income from own business, professional practice, partnership, or farm?	1: Yes 2: No	Personal_Profit_own1_R4	Factor(Binary)
RA	Economic Imputations	paired	rp003redi1/sp003rei1	z_rp003redi1	RA IMPUTED Respondent's earnings from own business, professional practice, partnership or farm in the last 12 months.		Personal_Profit_value1_R4	Continuous
RA	Economic Imputations	paired	rp016spi1/sp004spi1	z_rp016spi1	RA IMPUTED Spouse's income from wages, salaries, commissions, and tips before taxes and other deductions in the last 12 months.		Spouse_Wage1_R4	Continuous
RA	Economic Imputations	paired	rp017spi1/sp005spi1	z_rp017spi1	RA IMPUTED In the last 12 months, did respondent's spouse receive any income from own business, professional practice, partnership, or farm?	1: Yes 2: No	Spouse_Profit_own1_R4	Factor(Binary)
RA	Economic Imputations	paired	rp018spdi1/sp006spi1	z_rp018spdi1	RA IMPUTED Spouse's earnings from own business, professional practice, partnership or farm in the last 12 months.		Spouse_Profit_value1_R4	Continuous
RA	Economic Imputations	paired	gp205rei1/cp205rei1	z_gp205rei1	RA IMPUTED Did you receive Social Security income in the last 12 months?	1: Yes 2: No	SocialSecurity_own1_R5	Factor(Binary)
RA	Economic Imputations	paired	gp208reci1/cp208reci1	z_gp208reci1	RA IMPUTED In the last 12 months, how much Social Security income have you received?		SocialSecurity_value1_R5	Continuous
RA	Economic Imputations	paired	gp205spi1/cp205spi1	z_gp205spi1	RA IMPUTED Has your spouse received Social Security income in the last 12 months?	1: Yes 2: No	Sp_SocialSecurity_own1_R5	Factor(Binary)
RA	Economic Imputations	paired	gp208spci1/cp208spci1	z_gp208spci1	RA IMPUTED In the last 12 months, how much Social Security income has your spouse received?		Sp_SocialSecurity_value1_R5	Continuous
RA	Economic Imputations	paired	gp209rei1/cp209rei1	z_gp209rei1	RA IMPUTED Are you currently receiving benefits from any pension plans other than Social Security?	1: Yes 2: No	Pension_own1_R5	Factor(Binary)
RA	Economic Imputations	paired	gp211rei1/cp211rei1	z_gp211rei1	RA IMPUTED How much, in total, are you receiving from all of your pension plans, not including Social Security?		Pension_value1_R5	Continuous
RA	Economic Imputations	paired	gp212rei1/cp212rei1	z_gp212rei1	RA IMPUTED In the last 12 months, did you receive supplemental security income, public assistance income, or income from other government programs?	1: Yes 2: No	Subsidy_own1_R5	Factor(Binary)
RA	Economic Imputations	paired	gp213rei1/cp213rei1	z_gp213rei1	RA IMPUTED In the last 12 months, how much did you receive from supplemental security income, public assistance income, or income from other government programs?		Subsidy_value1_R5	Continuous
RA	Economic Imputations	paired	gp212spi1/cp212spi1	z_gp212spi1	RA IMPUTED In the last 12 months, did your spouse receive supplemental security income, public assistance income, or income from other government programs?	1: Yes 2: No	Spouse_Subsidy_own1_R5	Factor(Binary)
RA	Economic Imputations	paired	gp213spi1/cp213spi1	z_gp213spi1	RA IMPUTED In the last 12 months, how much did your spouse receive from supplemental security income, public assistance income, or income from other government programs?		Spouse_Subsidy_value1_R5	Continuous
RA	Economic Imputations	paired	gp214rpi1/cp214rpi1	z_gp214rpi1	RA IMPUTED Did you or your spouse receive income from interest, dividends or other investments in the last 12 months?	1: Yes 2: No	Household_Investments_own1_R5	Factor(Binary)
RA	Economic Imputations	paired	gp215rpi1/cp215rpi1	z_gp215rpi1	RA IMPUTED How much did you and your spouse receive in income from interest, dividends or other investments in the last 12 months?		Household_Investments1_R5	Continuous
RA	Economic Imputations	paired	gp250reci1/cp250reci1	z_gp250reci1	RA IMPUTED Total Personal Income - TPI.		Personal_Income1_R5	Continuous
RA	Economic Imputations	paired	gp260heci1/cp260heci1	z_gp260heci1	RA IMPUTED Total Household Income - THI.		Household_Income1_R5	Continuous
RA	Economic Imputations	paired	gr020rpi1/cr020rpi1	z_gr020rpi1	RA IMPUTED Do you own your own home, or are you renting?	1: Own Home 2: Rent Home 3: Lives with Parents 4: Lives With Children 5: Lives with Other Relatives 6: Lives with Other Non-Relatives 7: Lives in Church-Owned or Religious Organization Owned Home 8: Lives in Nursing Home 20: Other	Home_own1_R5	Factor(Categorical)
RA	Economic Imputations	paired	gr021rpi1/cr021rpi1	z_gr021rpi1	RA IMPUTED How much do you think your home would sell for now?		Home_value1_R5	Continuous
RA	Economic Imputations	paired	gr022rpi1/cr022rpi1	z_gr022rpi1	RA IMPUTED How much, if anything, do you owe on your home?		Home_loan1_R5	Continuous
RA	Economic Imputations	paired	gr023rpci1/cr023rpci1	z_gr023rpci1	RA IMPUTED Respondent's home equity.	NA: -2, -5, Negative Values Exist	Home_equity1_R5	Continuous
RA	Economic Imputations	paired	gr028rpi1/cr028rpi1	z_gr028rpi1	RA IMPUTED Do you own a business or farm?	1: Yes 2: No	Business_own1_R5	Factor(Binary)
RA	Economic Imputations	paired	gr029rpi1/cr029rpi1	z_gr029rpi1	RA IMPUTED How much do you think your business or farm would sell for now?		Business_value1_R5	Continuous
RA	Economic Imputations	paired	gr030rpi1/cr030rpi1	z_gr030rpi1	RA IMPUTED How much, if anything, do you owe on your business or farm?		Business_loan1_R5	Continuous
RA	Economic Imputations	paired	gr031rpci1/cr031rpci1	z_gr031rpci1	RA IMPUTED Respondent's business or farm equity.	NA: -2, -5, Negative Values Exist	Business_equity1_R5	Continuous
RA	Economic Imputations	paired	gr024rpi1/cr024rpi1	z_gr024rpi1	RA IMPUTED Do you own any real estate other than a first home, business, or farm?	1: Yes 2: No	RealEstate_own1_R5	Factor(Binary)
RA	Economic Imputations	paired	gr025rpi1/cr025rpi1	z_gr025rpi1	RA IMPUTED How much do you think this real estate that is not your first home, a business, or a farm would sell for now?		RealEstate_value1_R5	Continuous
RA	Economic Imputations	paired	gr026rpi1/cr026rpi1	z_gr026rpi1	RA IMPUTED How much, if anything, do you owe on your real estate that is not your first home, a business, or a farm?		RealEstate_loan1_R5	Continuous
RA	Economic Imputations	paired	gr027rpci1/cr027rpci1	z_gr027rpci1	RA IMPUTED Respondent's real estate equity for property that is not a first home, a business, or a farm.		RealEstate_equity1_R5	Continuous
RA	Economic Imputations	paired	gr032rpi1/cr032rpi1	z_gr032rpi1	RA IMPUTED Thinking of all your motor vehicles together, including cars, trucks, campers, boats, and other RVs, would you say they are worth more than $1000 or less than $1000?	1: More 2: Less 3: Don't Own a Vehicle	Vehicle_own1_R5	Factor(Binary)
RA	Economic Imputations	paired	gr033rpi1/cr033rpi1	z_gr033rpi1	RA IMPUTED How much do you think your motor vehicles, including cars, trucks, campers, boats, and other RVs, would sell for now?		Vehicle_value1_R5	Continuous
RA	Economic Imputations	paired	gr034rpi1/cr034rpi1	z_gr034rpi1	RA IMPUTED How much, if anything, do you owe on your motor vehicles, including cars, trucks, campers, boats, and other RVs?		Vehicle_loan1_R5	Continuous
RA	Economic Imputations	paired	gr035rpci1/cr035rpci1	z_gr035rpci1	RA IMPUTED Respondent's vehicle equity.	NA: -2, -5, Negative Values Exist	Vehicle_equity1_R5	Continuous
RA	Economic Imputations	paired	gr036rpi1/cr036rpi1	z_gr036rpi1	RA IMPUTED Do you owe a total of $5,000 or more for anything other than: mortgages, cars, trucks, campers, boats, other RVs, a business, a farm or real estate?	1: Yes 2: No	OtherLoan_own1_R5	Factor(Binary)
RA	Economic Imputations	paired	gr037rpi1/cr037rpi1	z_gr037rpi1	RA IMPUTED How much do you owe for anything other than: mortgages, cars, trucks, campers, boats, other RVs, a business, a farm or real estate?		OtherLoan_value1_R5	Continuous
RA	Economic Imputations	paired	gr060rpi1/cr060rpi1	z_gr060rpi1	RA IMPUTED Do you or your spouse have any retirement plans that accumulate an account balance - examples include IRA's, 401k's and profit sharing plans.		Household_RetirePlan_own1_R5	Factor(Binary)
RA	Economic Imputations	paired	gr061rpi1/cr061rpi1	z_gr061rpi1	RA IMPUTED If you added up all of your and your spouse's retirement plans that accumulate an account balance, about how much would they amount to right now?		Household_RetirePlan_value1_R5	Continuous
RA	Economic Imputations	paired	gr062rpi1/cr062rpi1	z_gr062rpi1	RA IMPUTED Do you or your spouse have more than $1000 or less than $1000 in checking accounts, savings accounts, or money market funds?	1: MORE THAN $1000 2: Less Than $1000 3: VOLUNTEERED: NO SUCH ACCOUNTS	Household_Cash_own1_R5	Factor(Binary)
RA	Economic Imputations	paired	gr063rpi1/cr063rpi1	z_gr063rpi1	RA IMPUTED If you added up all of your and your spouse's checking accounts, savings accounts, or money market funds, about how much would they amount to right now?		Household_Cash_value1_R5	Continuous
RA	Economic Imputations	paired	gr064rpi1/cr064rpi1	z_gr064rpi1	RA IMPUTED Do you or your spouse have any money in CDs, Government Savings Bonds, or Treasury Bills?	1: Yes 2: No	Household_CDs_own1_R5	Factor(Binary)
RA	Economic Imputations	paired	gr065rpi1/cr065rpi1	z_gr065rpi1	RA IMPUTED If you added up all of your and your spouse's CDs, Government Savings Bonds, or Treasury Bills, about how much would they amount to right now?		Household_CDs_value1_R5	Continuous
RA	Economic Imputations	paired	gr066rpi1/cr066rpi1	z_gr066rpi1	RA IMPUTED Do you or your spouse have stocks, bonds, or shares in a mutual fund?	1: Yes 2: No	Household_Stocks_own1_R5	Factor(Binary)
RA	Economic Imputations	paired	gr067rpi1/cr067rpi1	z_gr067rpi1	RA IMPUTED If you sold all of your and your spouse's stocks, bonds, or shares in a mutual fund and paid off anything you owed on them, about how much would you have?		Household_Stocks_value1_R5	Continuous
RA	Economic Imputations	paired	gr068rpi1/cr068rpi1	z_gr068rpi1	RA IMPUTED Do you or your spouse have any other assets? Other assets are anything other than: retirement plans, checking accounts, savings accounts, money market funds,CDs, Government Savings Bonds, Treasury Bills, stocks, bonds, or shares in a mutual fund?	1: Yes 2: No	Household_OthAssets_own1_R5	Factor(Binary)
RA	Economic Imputations	paired	gr069rpi1/cr069rpi1	z_gr069rpi1	RA IMPUTED If you sold any other assets and paid off any debts on these assets, about how much would you have? Other assets are anything other than: retirement plans, checking accounts, savings accounts, money market funds,CDs, Government Savings Bonds, Treasury Bills, stocks, bonds, or shares in a mutual fund.		Household_OthAssets_value1_R5	Continuous
RA	Economic Imputations	paired	gr080rei1/cr080rei1	z_gr080rei1	RA IMPUTED Do you, yourself, have any life insurance, including individual or group policies?	1: Yes 2: No	Personal_Insur_own1_R5	Factor(Binary)
RA	Economic Imputations	paired	gr081rei1/cr081rei1	z_gr081rei1	RA IMPUTED How much money would your beneficiaries receive from your life insurance policies if you were to die?		Personal_Insurance_reward1_R5	Continuous
RA	Economic Imputations	paired	gr081spi1/cr081spi1	z_gr081spi1	RA IMPUTED How much money would your spouse's beneficiaries receive from your spouse's life insurance policies if they were to die?		Spouse_Insurance_reward1_R5	Continuous
RA	Economic Imputations	paired	gr100rpci1/cr100rpci1	z_gr100rpci1	RA IMPUTED Respondent and spouse net worth, complete reports only.		Household_Assets1_R5	Continuous
R3	Income	paired	yfam74/xyfam76	z_yfam74	R3 Total earnings of participant and spouse in $100's last year.		Household_Income_R3	Continuous
R3	Income	paired	yrer74/xyrer76	z_yrer74	R3 Participant's total earnings last year in $100's.		Personal_Income_R3	Continuous
R3	Income	paired	yrwg74/xyrwg76	z_yrwg74	R3 Participant's wages and salaries in $100's last year.		Personal_Wage_R3	Continuous
R3	Childhood: Parent Information and Job Aspirations	paired	bklvpr/xbklvpr	z_bklvpr	R3 Did you live with both parents most of time up until you were 16?	1: Yes 2: No	Childhood_bothparents_R3	Factor(Binary)
R3	Childhood: Parent Information and Job Aspirations	paired	bkhs57/xbkhs57	z_bkhs57	R3 Summary code for head of household when participant was age 16.	1: Father 2: Mother 3: Other Male 4: Other Female	Childhood_head2_R3	Factor(Categorical)
R3	Childhood: Parent Information and Job Aspirations	paired	edhhyr/xedhhyr	z_edhhyr	R3 Highest grade of school head of household completed when participant was age 16.		Childhood_head_edu_R3	Continuous
R3	Childhood: Parent Information and Job Aspirations	paired	inhh57u/xinhh57	z_inhh57u	R3 1970 Census detailed industry code for head of household when participant was age 16.		Childhood_head_ind_census_R3	Factor(Categorical)
R3	Childhood: Parent Information and Job Aspirations	paired	ochh57u/xochh57	z_ochh57u	R3 1970 Census detailed occupation code for head of household when participant was age 16.		Childhood_head_occup_census_R3	Factor(Categorical)
R3	Childhood: Parent Information and Job Aspirations	paired	cwhh57u/xcwhh57	z_cwhh57u	R3 Class of worker code for head of household when participant was age 16.		Childhood_head_classwork_R3	Factor(Categorical)
R3	Childhood: Parent Information and Job Aspirations	paired	inmh57u/xinmh57	z_inmh57u	R3 1970 Major industry code for head of household when participant was age 16.		Childhood_head_indust_major_R3	Factor(Categorical)
R3	Childhood: Parent Information and Job Aspirations	paired	ocmh57u/xocmh57	z_ocmh57u	R3 1970 Major occupation code for head of household when participant was age 16.		Childhood_head_occup_major_R3	Factor(Categorical)
R3	Childhood: Parent Information and Job Aspirations	paired	ocsh57u2/xocsh57u	z_ocsh57u2	R3 1970 Duncan SEI score for head of household when participant was age 16.		Childhood_head_DuncanSEI_R3	Continuous
R3	Childhood: Parent Information and Job Aspirations	paired	ocph57u2/xocph57u	z_ocph57u2	R3 1970 Seigel prestige score for head of household when when participant was age 16.		Childhood_head_SiePrestige_R3	Continuous
R3	Childhood: Parent Information and Job Aspirations	paired	oceh57/xoceh57	z_oceh57	R3 1970 Occupational education score for head of household when participant was age 16.		Childhood_head_occup_edu_R3	Continuous
R3	Childhood: Parent Information and Job Aspirations	paired	ocih57/xocih57	z_ocih57	R3 1970 Occupational income score for head of household when participant was age 16.		Childhood_head_occup_income_R3	Continuous
R4	Assets Summary	paired	rr023rec/sr023rec	z_rr023rec	R4 Respondent's home equity.	NA: -1, -2, -3, Negative Values Exist	Home_equity_R4	Continuous
R4	Assets Summary	paired	rr035rec/sr035rec	z_rr035rec	R4 Motor vehicle equity, includes cars, trucks, campers, boats, and other RVs.	NA: -1, -2, -3, Negative Values Exist	Vehicle_equity_R4	Continuous
R4	Assets Summary	paired	rr043rec/sr043rec	z_rr043rec	R4 Respondent and spouse net worth.	0: No Assets, -2: NA	Household_Assets_R4	Continuous
R4	Current/Last Job Characteristics	paired	rg021jjd/sg021jjh	z_rg021jjd	R4 Base hourly wage rate		Work_hourlywage_R4	Continuous
R4	Pension summary	paired	rt001re/st001re	z_rt001re	R4 Are you currently included in a pension plan or retirement plan offered by a current or former employer or union?	1: Yes 2: No	Pension_employer_R4	Factor(Binary)
R4	Pension summary	paired	rt003re/st004re	z_rt003re	R4 Do you have an individual IRA or Keogh Account?	1: Yes 2: No	Pension_ira_R4	Factor(Binary)
R4	Pension summary	paired	rt004sp/st005sp	z_rt004sp	R4 Does your spouse have a pension plan from any current or former employers?	1: Yes 2: No	Spouse_Pension_employer_R4	Factor(Binary)
R4	Pension summary	paired	rt005re/st006re	z_rt005re	R4 Do you have any retirement or pension plans other than a pension plan or retirement plan offered by a current or former employer or union, an individual IRA, or a Keogh Account?	1: Yes 2: No	Pension_other_R4	Factor(Binary)
R5	Employment	paired	gf020jcf/cf067ree	z_gf020jcf	R5 1990 Occupational Income Score for first or only job in current or last employment spell.		Occup_Income_Score_R5	Continuous
R5	Pensions	paired	gt101re/ct101re	z_gt101re	R5 Besides Social Security, do you have any pension or retirement plans, including those you became eligible for through your spouse?	1: Yes 2: No	Pension_R5	Factor(Binary)
R5	Pensions	paired	gt102re/ct102re	z_gt102re	R5 Does respondent have any employer provided pensions?	1: Yes 2: No	Pension_employer_R5	Factor(Binary)
R5	Pensions	paired	gt103re/ct103re	z_gt103re	R5 Does respondent have IRAs or Keogh plans?	1: Yes 2: No	Pension_ira_R5	Factor(Binary)
R5	Pensions	paired	gt104re/ct104re	z_gt104re	R5 Does respondent have 401k or 403b plans?	1: Yes 2: No	Pension_401k_R5	Factor(Binary)
R5	Pensions	paired	gt105re/ct105re	z_gt105re	R5 Does respondent have annuities?	1: Yes 2: No	Pension_annuity_R5	Factor(Binary)
R5	Pensions	paired	gt106re/ct106re	z_gt106re	R5 Does respondent have a type of pension or retirement plan other than employer provided pensions, IRAs, Keogh plans, 401k or 403b plans, or annuities?	1: Yes 2: No	Pension_other_R5	Factor(Binary)
R5	Pensions	paired	gt108re/ct108re	z_gt108re	R5 Do you have any retirement plans from which you are not currently receiving benefits?	1: Yes 2: No	RetirementPlan_own_R5	Factor(Binary)
Work characteristics
R3	Job History and Unemployment	paired	wrwk74/xwrwk76	z_wrwk74	R3 How many weeks did participant work last year, either full-or part-time?		Work_weeks_R3	Continuous
R3	Job History and Unemployment	paired	lfwk74/xlfwk76	z_lfwk74	R3 Weeks participant was in labor force last year.		LaborForce_weeks_R3	Continuous
R3	Job History and Unemployment	paired	lfstat/xlfstat	z_lfstat	R3 Participant's labor force status.	1: Employed-Civilian 2: Experienced Unemployed 3: Inexperienced Unemployed 4: Not in Labour Force 5: Employed-Military	LaborForce_status_R3	Factor(Categorical)
R3	Job History and Unemployment	paired	lfmalw/xlfmalw	z_lfmalw	R3 Respondent's major activity at current employment (last week's activity for Graduate but present activity for Sibling).	1: Working 2: With a Job but Not At Work 3: Looking for Work 4: Keeping House 5: Going to School 6: Unable to Work 7: Other(Including Retired)	LaborForce_MajorActivity_R3	Factor(Categorical)
R4	Future plans and retirement	paired	rw021red/sw021red	z_rw021red	R4 What are the chances that you will be doing what you want to do 10 years from now?	0: No Chance ~ 10: Absolutely Certain	FutureChance_work_R4	Continuous
R4	Future plans and retirement	paired	rw024sp/sw024sp	z_rw024sp	R4 What is your spouse's retirement status?	1: Retired 2: Partly Retired 3: WORKING AND NOT RETIRED AT ALL 4: Not Working and Not Retired	Spouse_Retirement_R4	Factor(Categorical)
R4	Future plans and retirement	paired	rw026red/sw026red	z_rw026red	R4 What are the chances that you will reduce the time spent working before stopping work altogether?	0: No Chance ~ 10: Absolutely Certain	FutureChance_reducetime_R4	Continuous
R4	Future plans and retirement	paired	rw030ree/sw030ree	z_rw030ree	R4 Upon retirement, what are your expected change in standard of living?	1: Increase A Lot 2: Increase Somewhat 3: Stay About the Same As Now 4: Decline Somewhat 5: Decline A Lot	Retirement_change_expect_R4	Continuous
R4	Current/Last Job Characteristics	paired	rg020jjc/sg020jjd	z_rg020jjc	R4 Total hours worked per week on all jobs.		Work_hours_R4	Continuous
R4	Current/Last Job Characteristics	paired	rg024jjc/sg024jj	z_rg024jjc	R4 Summary - not including yourself, about how many people worked where you worked for your current/last company?		Work_num_R4	Continuous
R4	Current/Last Job Characteristics	paired	rg025jjc/sg025jj	z_rg025jjc	R4 Current/last firm size, categorical.		Work_firmsize_R4	Continuous
R4	Current/Last Job Characteristics	paired	rg044jjc/sg044jj	z_rg044jjc	R4 All things considered, how satisfied are you with your job as a whole?	1: Very Satisfied ~ 4: Very Dissatisfied	Work_satisfied_R4	Continuous
R4	Current/Last Job Characteristics	paired	rg045jjc/sg045jj	z_rg045jjc	R4 Would you agree or disagree that a person on your job learns new things that could lead to a better job or promotion?	0: Neither Agree Nor Disagree, 1: Agree Strongly ~ 6: Disagree Strongly	Work_learnnew_R4	Continuous
R4	Current/Last Job Characteristics	paired	rg046jjc/sg046jj	z_rg046jjc	R4 How frequently does your job require lots of physical effort?	1: Always ~ 5: Never	Work_physical_R4	Continuous
R4	Current/Last Job Characteristics	paired	rg047jjc/sg047jj	z_rg047jjc	R4 How frequently does your job require intense concentration or attention?	1: Always ~ 5: Never	Work_concentration_R4	Continuous
R4	Current/Last Job Characteristics	paired	rg048jjc/sg048jj	z_rg048jjc	R4 How frequently do you have to work under the pressure of time?	1: Always ~ 5: Never	Work_timepressure_R4	Continuous
R4	Current/Last Job Characteristics	paired	rg049jjc/sg049jj	z_rg049jjc	R4 In an average week on your job, how many hours do you spend reading, writing, and dealing with written materials?		Work_read_R4	Continuous
R4	Current/Last Job Characteristics	paired	rg050jjc/sg050jj	z_rg050jjc	R4 How many hours per week do you spend working with your hands, tools, or equipment?		Work_hands_R4	Continuous
R4	Current/Last Job Characteristics	paired	rg051jjc/sg051jj	z_rg051jjc	R4 How many hours per week do you spend dealing with people about work, not just passing the time of day?		Work_people_R4	Continuous
R4	Current/Last Job Characteristics	paired	rg052jjc/sg052jj	z_rg052jjc	R4 How many hours per week do you do the same things over and over?		Work_same_hours_R4	Continuous
R4	Current/Last Job Characteristics	paired	rg053jjc/sg053jj	z_rg053jjc	R4 How dirty do you get on the job?	1: Very Dirty ~ 4: Not At All Dirty	Work_dirty_R4	Continuous
R4	Current/Last Job Characteristics	paired	rg054jjc/sg054jj	z_rg054jjc	R4 Were you exposed to dangerous conditions in your work?	0: No, 1: Yes	Work_dangerous_R4	Factor(Binary)
R4	Current/Last Job Characteristics	paired	rg056jje/sg056jje	z_rg056jje	R4 Degree of seriousness of dangerous condition on job. Constructed from SG055JJD.	1: Not Serious or Extreme Danger 2: Serious Danger 3: Extreme Danger	Work_dangerous_level_R4	Continuous
R4	Current/Last Job Characteristics	paired	rg057jjd/sg057jjd	z_rg057jjd	R4 How frequently are you exposed to dangerous conditions?	1: Always ~ 5: Never	Work_dangerous_freq_R4	Continuous
R4	Current/Last Job Characteristics	paired	rg058jjc/sg058jj	z_rg058jjc	R4 On a scale from one to ten, what chance do you think there is that you will lose your job completely in the next two years?	0: No Chance ~ 10: Absolutely Certain	FutureChance_losejob_R4	Continuous
R4	Current/Last Job Characteristics	paired	rg059jjc/sg059jj	z_rg059jjc	R4 Do you get paid vacations?	0: No, 1: Yes	Work_paidvacation_R4	Factor(Binary)
R4	Current/Last Job Characteristics	paired	rg060jjc/sg060jj	z_rg060jjc	R4 Other than holidays like the Fourth of July or Labor Day, how many paid vacation days are you allowed to take off each year?		Work_paidvacation_days_R4	Continuous
R5	Employment	paired	gf014jce/cf061red	z_gf014jce	R5 1990 Census detailed industry code for first or only job in current or last employment spell.		IndustryCode1990_Census_R5	Factor(Categorical)
R5	Employment	paired	gf015jce/cf062red	z_gf015jce	R5 1990 Census detailed occupation code for first or only job in current or last employment spell.		OccupCode1990_Census_R5	Factor(Categorical)
R5	Employment	paired	gf016jcf/cf063ree	z_gf016jcf	R5 1990 Major industry code for first or only job in current or last employment spell.		IndustryCode1990_Major_R5	Factor(Categorical)
R5	Employment	paired	gf017jcf/cf064ref	z_gf017jcf	R5 1990 Major occupation code for first or only job in current or last employment spell.		OccupCode1990_Major_R5	Factor(Categorical)
R5	Employment	paired	gf018jcf/cf065ree	z_gf018jcf	R5 1989 Nakao-Treas Prestige Rating for first or only job in current or last employment spell.		NTPrestige1989_R5	Continuous
R5	Employment	paired	gf026jcd/cf069rec	z_gf026jcd	R5 Does the company in current or last employment spell offer a pension or retirement plan?	1: Yes 2: No	Work_pension_R5	Factor(Binary)
R5	Employment	paired	gf027jcd/cf070rec	z_gf027jcd	R5 Does the company in current or last employment spell offer health insurance?	1: Yes 2: No	Work_insurance_R5	Factor(Binary)
R5	Employment	paired	gfu07jce/cfu54ree	z_gfu07jce	R5 Class of Worker code for current/last employment spell.		ClassWorker_R5	Factor(Categorical)
R5	Pensions	paired	gt112re/ct112re	z_gt112re	R5 At this time do you consider yourself partly retired, completely retired, or not retired at all?	1: COMPLETELY RETIRED 2: PARTLY RETIRED 3: NOT RETIRED AT ALL	Retirement_R5	Factor(Categorical)
R5	Work And Family	paired	ig303rer/dg303rer	z_ig303rer	R5 Have you ever been employed, including self-employment?	1: Yes 2: No	Employment_ever_R5	Factor(Binary)
R5	Work And Family	paired	ig326rer/dg326rer	z_ig326rer	R5 To what extent do you agree that your job requires working very fast?	1: Strongly Agree 2: Agree 3: Disagree 4: Strongly Disagree	Work_fast_R5	Continuous
R5	Work And Family	paired	ig327rer/dg327rer	z_ig327rer	R5 To what extent do you agree that your job allows you to make a lot of decisions on your own?	1: Strongly Agree 2: Agree 3: Disagree 4: Strongly Disagree	Work_decision_R5	Continuous
R5	Work And Family	paired	ig328rer/dg328rer	z_ig328rer	R5 To what extent do you agree that your job requires that you learn new things?	1: Strongly Agree 2: Agree 3: Disagree 4: Strongly Disagree	Work_learnnew_R5	Continuous
R5	Work And Family	paired	ig329rer/dg329rer	z_ig329rer	R5 To what extent do you agree that your job requires working very hard?	1: Strongly Agree 2: Agree 3: Disagree 4: Strongly Disagree	Work_hard_R5	Continuous
R5	Work And Family	paired	ig330rer/dg330rer	z_ig330rer	R5 To what extent do you agree that you have very little freedom to decide how you do your work on the job?	1: Strongly Agree 2: Agree 3: Disagree 4: Strongly Disagree	Work_littlefreedom_R5	Continuous
R5	Work And Family	paired	ig331rer/dg331rer	z_ig331rer	R5 To what extent do you agree that your job involves a lot of repetitive work?	1: Strongly Agree 2: Agree 3: Disagree 4: Strongly Disagree	Work_repetition_R5	Continuous
R5	Work And Family	paired	ig332rer/dg332rer	z_ig332rer	R5 To what extent do you agree that you are not asked to do an excessive amount of work at your job?	1: Strongly Agree 2: Agree 3: Disagree 4: Strongly Disagree	Work_noexcessive_R5	Continuous
R5	Work And Family	paired	ig333rer/dg333rer	z_ig333rer	R5 To what extent do you agree that you have a lot of say about what happens on your job?	1: Strongly Agree 2: Agree 3: Disagree 4: Strongly Disagree	Work_sayalot_R5	Continuous
R5	Work And Family	paired	ig334rer/dg334rer	z_ig334rer	R5 To what extent do you agree that your job requires you to be creative?	1: Strongly Agree 2: Agree 3: Disagree 4: Strongly Disagree	Work_creative_R5	Continuous
R5	Work And Family	paired	ig335rer/dg335rer	z_ig335rer	R5 To what extent do you agree that you have enough time to get the job done?	1: Strongly Agree 2: Agree 3: Disagree 4: Strongly Disagree	Work_enoughtime_R5	Continuous
R5	Work And Family	paired	ig336rer/dg336rer	z_ig336rer	R5 To what extent do you agree that you can determine the order in which your work is to be done on your job?	1: Strongly Agree 2: Agree 3: Disagree 4: Strongly Disagree	Work_decideorder_R5	Continuous
R5	Work And Family	paired	ig337rer/dg337rer	z_ig337rer	R5 To what extent do you agree that your job requires a high level of skill?	1: Strongly Agree 2: Agree 3: Disagree 4: Strongly Disagree	Work_highskill_R5	Continuous
R5	Work And Family	paired	ig338rer/dg338rer	z_ig338rer	R5 To what extent do you agree that you are free of conflicting demands that others make on your job?	1: Strongly Agree 2: Agree 3: Disagree 4: Strongly Disagree	Work_nodemand_R5	Continuous
R5	Work And Family	paired	ig339rer/dg339rer	z_ig339rer	R5 To what extent do you agree that you can determine when a task is to be done on your job?	1: Strongly Agree 2: Agree 3: Disagree 4: Strongly Disagree	Work_decidetask_R5	Continuous
R5	Work And Family	paired	ig340rer/dg340rer	z_ig340rer	R5 To what extent do you agree that your job requires long periods of intense concentration?	1: Strongly Agree 2: Agree 3: Disagree 4: Strongly Disagree	Work_concentration2_R5	Continuous
R5	Work And Family	paired	ig341rer/dg341rer	z_ig341rer	R5 To what extent do you agree that you can easily leave the workplace for a brief period?	1: Strongly Agree 2: Agree 3: Disagree 4: Strongly Disagree	Work_easyleave_R5	Continuous
R5	Work And Family	paired	ig342rer/dg342rer	z_ig342rer	R5 To what extent do you agree that you get to do a variety of different things on your job?	1: Strongly Agree 2: Agree 3: Disagree 4: Strongly Disagree	Work_manydifferent_R5	Continuous
R5	Work And Family	paired	ig343rer/dg343rer	z_ig343rer	R5 To what extent do you agree that your tasks on the job are often interrupted before they can be completed, requiring attention at a later time?	1: Strongly Agree 2: Agree 3: Disagree 4: Strongly Disagree	Work_interrupt_R5	Continuous
R5	Work And Family	paired	ig344rer/dg344rer	z_ig344rer	R5 To what extent do you agree that you can interrupt your work if you so desire?	1: Strongly Agree 2: Agree 3: Disagree 4: Strongly Disagree	Work_decideinterrupt_R5	Continuous
R5	Work And Family	paired	ig345rer/dg345rer	z_ig345rer	R5 To what extent do you agree that your job is very hectic?	1: Strongly Agree 2: Agree 3: Disagree 4: Strongly Disagree	Work_hectic_R5	Continuous
R5	Work And Family	paired	ig346rer/dg346rer	z_ig346rer	R5 To what extent do you agree that you have an opportunity to develop your own special abilities on your job?	1: Strongly Agree 2: Agree 3: Disagree 4: Strongly Disagree	Work_chanceskill_R5	Continuous
R5	Work And Family	paired	ig347rer/dg347rer	z_ig347rer	R5 To what extent do you agree that you can determine your own work rate on your job?	1: Strongly Agree 2: Agree 3: Disagree 4: Strongly Disagree	Work_deciderate_R5	Continuous
R5	Work And Family	paired	ig348rer/dg348rer	z_ig348rer	R5 To what extent do you agree that waiting on work from other people or departments often slows you down on your job?	1: Strongly Agree 2: Agree 3: Disagree 4: Strongly Disagree	Work_wait_R5	Continuous
R5	Work And Family	paired	ig349rer/dg349rer	z_ig349rer	R5 To what extent do you agree that you have too much work to do everything well on your job?	1: Strongly Agree 2: Agree 3: Disagree 4: Strongly Disagree	Work_toomuch_R5	Continuous
R5	Work And Family	paired	ig350rer/dg350rer	z_ig350rer	R5 To what extent do you agree that the safety and health conditions where you work are good?	1: Strongly Agree 2: Agree 3: Disagree 4: Strongly Disagree	Work_safe_R5	Continuous
R5	Work And Family	paired	ig351rer/dg351rer	z_ig351rer	R5 In an average week at the job, how many hours do or did you spend reading, writing and dealing with written materials?		Work_read_R5	Continuous
R5	Work And Family	paired	ig352rer/dg352rer	z_ig352rer	R5 In an average week at the job, how many hours do or did you spend working with your hands, tools or equipment?		Work_hands_R5	Continuous
R5	Work And Family	paired	ig353rer/dg353rer	z_ig353rer	R5 In an average week at the job, how many hours do or did you spend dealing with people about work, not just passing the time of day?		Work_people_R5	Continuous
R5	Work And Family	paired	ig354rer/dg354rer	z_ig354rer	R5 In an average week at the job, how many hours do or did you do the same thing over and over?		Work_same_hours_R5	Continuous
R5	Work And Family	paired	ig312rer/dg312rer	z_ig312rer	R5 How often do you have to lift, pull or carry heavy loads at your job?	1: Never 2: Rarely 3: Sometimes 4: Often 5: Very Often	Work_heavy_R5	Continuous
R5	Work And Family	paired	ig313rer/dg313rer	z_ig313rer	R5 How often do you have to work in an awkward posture at your job?	1: Never 2: Rarely 3: Sometimes 4: Often 5: Very Often	Work_awkward_R5	Continuous
R5	Work And Family	paired	ig314rer/dg314rer	z_ig314rer	R5 How often do you have to stand for prolonged periods of time at your job?	1: Never 2: Rarely 3: Sometimes 4: Often 5: Very Often	Work_stand_R5	Continuous
R5	Work And Family	paired	ig315rer/dg315rer	z_ig315rer	R5 How often do you have to kneel or squat for prolonged periods of time at your job?	1: Never 2: Rarely 3: Sometimes 4: Often 5: Very Often	Work_kneel_R5	Continuous
R5	Work And Family	paired	ig316rer/dg316rer	z_ig316rer	R5 How often do you do repeated lifting, pushing, pulling or bending at your job?	1: Never 2: Rarely 3: Sometimes 4: Often 5: Very Often	Work_bend_R5	Continuous
R5	Work And Family	paired	ig317rer/dg317rer	z_ig317rer	R5 How often do you perform repetitive or forceful hand movements at your job?	1: Never 2: Rarely 3: Sometimes 4: Often 5: Very Often	Work_hands2_R5	Continuous
R5	Work And Family	paired	ig318rer/dg318rer	z_ig318rer	R5 How much does your immediate boss or supervisor go out of his/her way to do things to make your life easier for you?	1: Not At All 2: A Little 3: Somewhat 4: Very Much 5: Don't Have Such a Person	Work_boss_help_R5	Continuous
R5	Work And Family	paired	ig319rer/dg319rer	z_ig319rer	R5 How much do other people at work go out of their way to do things to make your life easier for you?	1: Not At All 2: A Little 3: Somewhat 4: Very Much 5: Don't Have Such a Person	Work_coworker_help_R5	Continuous
R5	Work And Family	paired	ig320rer/dg320rer	z_ig320rer	R5 How easy is it to talk to your immediate boss or supervisor?	1: Not At All 2: A Little 3: Somewhat 4: Very Much 5: Don't Have Such a Person	Work_boss_talk_R5	Continuous
R5	Work And Family	paired	ig321rer/dg321rer	z_ig321rer	R5 How easy is it to talk to other people at work?	1: Not At All 2: A Little 3: Somewhat 4: Very Much 5: Don't Have Such a Person	Work_coworker_talk_R5	Continuous
R5	Work And Family	paired	ig322rer/dg322rer	z_ig322rer	R5 How much can your immediate boss or supervisor be relied on when things get tough at work?	1: Not At All 2: A Little 3: Somewhat 4: Very Much 5: Don't Have Such a Person	Work_boss_rely_R5	Continuous
R5	Work And Family	paired	ig323rer/dg323rer	z_ig323rer	R5 How much can other people be relied on when things get tough at work?	1: Not At All 2: A Little 3: Somewhat 4: Very Much 5: Don't Have Such a Person	Work_coworker_rely_R5	Continuous
R5	Work And Family	paired	ig324rer/dg324rer	z_ig324rer	R5 How much is your immediate boss or supervisor willing to listen to your personal problems?	1: Not At All 2: A Little 3: Somewhat 4: Very Much 5: Don't Have Such a Person	Work_boss_listen_R5	Continuous
R5	Work And Family	paired	ig325rer/dg325rer	z_ig325rer	R5 How much are other people willing to listen to your personal problems?	1: Not At All 2: A Little 3: Somewhat 4: Very Much 5: Don't Have Such a Person	Work_coworker_listen_R5	Continuous
Educational access and quality
R3	Education	paired	edelrs/xedelrs	z_edelrs	R3 Ever attended college?	0: No 1: Yes	College_attendance_R3	Factor(Binary)
R3	Education	paired	edyrcm/xedyrcm	z_edyrcm	R3 Self-reported total number of years of college completed.		College_years_R3	Continuous
R3	Education	paired	edvtno/xedvtno	z_edvtno	R3 Number of vocational-technical or apprenticeship programs.		Training_num_R3	Continuous
R4	Education	paired	rb001re/sb001re	z_rb001re	R4 Summary of ever attended college.	1: Yes 2: No	College_attendance_R4	Factor(Binary)
R4	Education	paired	rb002rec/sb002rec	z_rb002rec	R4 Summary of total number of years of college completed.		College_years_R4	Continuous
R5	Education	paired	gb001re/cb001re	z_gb001re	R5 Have you attended college?	1: Yes 2: No	College_attendance_R5	Factor(Binary)
R5	Education	paired	gb103red/cb103red	z_gb103red	R5 How many years of education does R have based on his or her highest degree?		Education_years_R5	Continuous
R5	Employment	paired	gf019jcf/cf066ree	z_gf019jcf	R5 1990 Occupational Education Score for first or only job in current or last employment spell.		Occup_Edu_Score_R5	Continuous
Social and community context
R3	Marriage	paired	mrstat/xmrstat	z_mrstat	R3 Current marital status.	1: Single 2: Married 3: Separated 4: Divorced 5: Widowed	Marital_status_R3	Factor(Categorical)
R3	Marriage	paired	mrhist/xmrhist	z_mrhist	R3 Marital history.	1: Single-Never Married 2: Currently Married-Married Only Once 3: Currently Married-Married More Than Once 4: Separated-Married Only Once 5: Separated-Married More Than Once 6: Divorced-Married Only Once 7: Divorced-Married More Than Once 8: Widowed-Married Only Once 9: Widowed-Married More Than Once	Marital_history_R3	Factor(Categorical)
R3	Social Participation	paired	soorno/xsoorno	z_soorno	R3 Number of organizations in which participant has at least some involvement.		Social_num_R3	Continuous
R3	Social Participation	paired	soorin/xsoorin	z_soorin	R3 Number of organizations in which participant has very much involvement.		Social_num2_R3	Continuous
R3	Social Participation	paired			R3 Number of Total Level of Social Involvement		Social_involvement_R3	Continuous
R3	Social Participation	paired	sopar1/xsopar1	z_sopar1	R3 What is your level of involvement with church-connected groups, but not the church itself?	0: None 1: Some Involvement 2: Very Much Involved	Social_church_R3	Continuous
R3	Social Participation	paired	sopar2/xsopar2	z_sopar2	R3 What is your level of involvement with labor unions?	0: None 1: Some Involvement 2: Very Much Involved	Social_union_R3	Continuous
R3	Social Participation	paired	sopar3/xsopar3	z_sopar3	R3 What is your level of involvement with veterans' organizations?	0: None 1: Some Involvement 2: Very Much Involved	Social_veteran_R3	Continuous
R3	Social Participation	paired	sopar4/xsopar4	z_sopar4	R3 What is your level of involvement with fraternal organizations or lodges?	0: None 1: Some Involvement 2: Very Much Involved	Social_fraternal_R3	Continuous
R3	Social Participation	paired	sopar5/xsopar5	z_sopar5	R3 What is your level of involvement with business or civic groups?	0: None 1: Some Involvement 2: Very Much Involved	Social_business_R3	Continuous
R3	Social Participation	paired	sopar6/xsopar6	z_sopar6	R3 What is your level of involvement with parent-teacher associations?	0: None 1: Some Involvement 2: Very Much Involved	Social_pta_R3	Continuous
R3	Social Participation	paired	sopar7/xsopar7	z_sopar7	R3 What is your level of involvement with community centers?	0: None 1: Some Involvement 2: Very Much Involved	Social_community_R3	Continuous
R3	Social Participation	paired	sopar8/xsopar8	z_sopar8	R3 What is your level of involvement with organizations of people with the same nationality?	0: None 1: Some Involvement 2: Very Much Involved	Social_nationality_R3	Continuous
R3	Social Participation	paired	sopar9/xsopar9	z_sopar9	R3 What is your level of involvement with sport teams?	0: None 1: Some Involvement 2: Very Much Involved	Social_sport_R3	Continuous
R3	Social Participation	paired	sopr10/xsopr10	z_sopr10	R3 What is your level of involvement with country clubs?	0: None 1: Some Involvement 2: Very Much Involved	Social_countryclub_R3	Continuous
R3	Social Participation	paired	sopr11/xsopr11	z_sopr11	R3 What is your level of involvement with youth groups, e.g. scout leader, etc.?	0: None 1: Some Involvement 2: Very Much Involved	Social_youth_R3	Continuous
R3	Social Participation	paired	sopr12/xsopr12	z_sopr12	R3 What is your level of involvement with professional groups?	0: None 1: Some Involvement 2: Very Much Involved	Social_profesional_R3	Continuous
R3	Social Participation	paired	sopr13/xsopr13	z_sopr13	R3 What is your level of involvement with political clubs or organizations?	0: None 1: Some Involvement 2: Very Much Involved	Social_political_R3	Continuous
R3	Social Participation	paired	sopr14/xsopr14	z_sopr14	R3 What is your level of involvement with neighborhood improvement organizations?	0: None 1: Some Involvement 2: Very Much Involved	Social_neighborhood_R3	Continuous
R3	Social Participation	paired	sopr15/xsopr15	z_sopr15	R3 What is your level of involvement with charity or welfare organizations?	0: None 1: Some Involvement 2: Very Much Involved	Social_charity_R3	Continuous
R3	Social Participation	paired	sopr16/xsopr16	z_sopr16	R3 What is your level of involvement with the first group besides church-connected groups, labor unions, verteran's organziations, fraternal organizations or lodges, business or civic groups, parent-teacher associations, community centers, organizations of people of the same nationality, sport teams, country clubs, youth groups, professinal groups, politcal clubs or organizations, neighborhood im…	0: None 1: Some Involvement 2: Very Much Involved	Social_other1_R3	Continuous
R3	Social Participation	paired	sopr17/xsopr17	z_sopr17	R3 What is your level of involvement with the second group besides church-connected groups, labor unions, verteran's organziations, fraternal organizations or lodges, business or civic groups, parent-teacher associations, community centers, organizations of people of the same nationality, sport teams, country clubs, youth groups, professinal groups, politcal clubs or organizations, neighborhood i…	0: None 1: Some Involvement 2: Very Much Involved	Social_other2_R3	Continuous
R3	Social Participation	paired	sofrno/xsofrno	z_sofrno	R3 How many times in the past four weeks have you gotten together with friends?		Social_friends_R3	Continuous
R3	Religion	paired	bkxrl3/xbkxrl3	z_bkxrl3	R3 How often did you attend religious service last year?	1: One Time Per Week 2: Two or Three Times Per Month 3: One Time Per Month 4: A Few Times Per Year 5: Less Than A few Times Per Year 6: Never	Religion_attendance_R3	Continuous
R4	Caregiving	paired	rv016re/sv016re	z_rv016re	R4 During the last 12 months has respondent given personal care for a period of one month or more to a family member or friend because of a physical or mental condition, illness, or disability?	1: Yes 2: No	Caregiving_give_health_R4	Factor(Binary)
R4	Caregiving	paired	rv027re/sv027re	z_rv027re	R4 In how many different weeks during the past 12 months did respondent give personal care to person z_rv017re?		Caregiving_give_weeks_R4	Continuous
R4	Caregiving	paired	rv028re/sv028re	z_rv028re	R4 During those weeks, about how many hours per week, on the average, did respondent help person z_rv017re?		Caregiving_give_hours_R4	Continuous
R4	Caregiving	paired	rv031re/sv031re	z_rv031re	R4 During the last 12 months did respondent receive personal care for a period of one month or more from a family member or friend because of a health condition, illness, or disability?	1: Yes 2: No	Caregiving_get_health_R4	Factor(Binary)
R4	Caregiving	paired	rv041re/sv041re	z_rv041re	R4 In how many different weeks during the past 12 months did respondent receive personal care from person z_rv033re?		Caregiving_get_weeks_R4	Continuous
R4	Caregiving	paired	rv042re/sv042re	z_rv042re	R4 During those weeks, about how many hours per week, on the average, did person z_rv033re help respondent?		Caregiving_get_hours_R4	Continuous
R4	Caregiving	paired	rv047sp/sv047sp	z_rv047sp	R4 During the last 12 months did respondent's spouse receive personal care for a period of one month or more from a family member or friend because of a physical or mental condition, illness, or disability?		Sp_Caregiving_get_health_R4	Factor(Binary)
R4	Caregiving	paired	rv049sp/sv049sp	z_rv049sp	R4 In how many different weeks during the past 12 months did respondent's spouse receive personal care from this person?		Spouse_Caregiving_get_weeks_R4	Continuous
R4	Caregiving	paired	rv050sp/sv050sp	z_rv050sp	R4 During those weeks, about how many hours per week, on the average, did this person help respondent's spouse?		Spouse_Caregiving_get_hours_R4	Continuous
R4	Household Roster	paired	re001he/se001he	z_re001he	R4 Number of household members. Includes the respondent.		Family_num_R4	Continuous
R4	Household Roster	paired	re050ma/se050ma	z_re050ma	R4 Is your mother alive?	1: Yes 2: No	Family_mother_R4	Factor(Binary)
R4	Household Roster	paired	re062fa/se055fa	z_re062fa	R4 Is your father alive?	1: Yes 2: No	Family_father_R4	Factor(Binary)
R4	Household Roster	paired	re070fad/se070fad	z_re070fad	R4 During the past 12 months, how often did you have contact with your father, either in person, by letter, or by phone?	0: NEVER OR LESS THAN ONCE A YEAR ~ 950: 950 TIMES OR MORE PER YEAR	Family_father_contact_R4	Continuous
R4	Household Roster	paired	re073fab/se073fab	z_re073fab	R4 How close are you and your father?	1: Very Close 2: Somewhat Close 3: Not Very Close 4: Not At All Close	Family_father_close_R4	Continuous
R4	Children's Roster	paired	rd001kd/sd001kd	z_rd001kd	R4 Total number of respondent's children. Include biological, adopted, step or foster children as well as other children respondent considered to be a part of his/her family.		Children_num_R4	Continuous
R4	Marriage	paired	rc001re/sc001re	z_rc001re	R4 Current marital status	1: Married, 2: Separated, 3: Divorced, 4: Widowed, 5: Never Married	Marital_status_R4	Factor(Categorical)
R4	Marriage	paired	rc004re/sc004ree	z_rc004re	R4 Marital history.	1: Currently Married, Married Only Once, 2: Currently Married, Married More than Once, 3: Separated, Married Only Once, 4: Separated, Married More than Once, 5: Divorced, Married Only Once, 6: Divorced, Married More than Once, 7: Widowed, Married Only Once, 8: Widowed, Married More than Once, 9: Single, Never Married	Marital_history_R4	Factor(Categorical)
R4	Marriage	paired	rc006re/sc006reg	z_rc006re	R4 Age of respondent when married current spouse.		Marital_age_R4	Continuous
R4	Marriage	paired	rc040re/sc040rec	z_rc040re	R4 How close respondent is with current spouse.	1: Not At All Close 2: Not Very Close 3: Somewhat Close 4: Very Close	Spouse_close_R4	Continuous
R4	Religion	paired	rl004rec/sl004rec	z_rl004rec	R4 Summary of frequency of religious attendance in the last year.		Religion_attendance_R4	Continuous
R4	Selected Sibling	paired	rk001ss/sk001ss	z_rk001ss	R4 status of 197x (reciprocal) selected sibling in 199x	1: ALIVE AT TIME OF 199x INTERVIEW 2: DECEASED PRIOR TO 199x INTERVIEW 3: R REFUSED TO DISCUSS SIBLING 4: DECEASED AFTER 199x INTERVIEW	Sibling_R4	Factor(Categorical)
R4	Selected Sibling	paired	rk059ssf/sk059ssf	z_rk059ssf	R4 Frequency of contact with selected sibling during the last 12 months.		Sibling_contact_R4	Continuous
R4	Selected Sibling	paired	rk062ssd/sk062ssd	z_rk062ssd	R4 How close does graduate feel towards selected sibling?	1: Very Close 2: Somewhat Close 3: Not Very Close 4: Not At All Close	Sibling_close_R4	Continuous
R4	Caregiving	paired	mv014re/nv014re	z_mv014re	R4 During the past month have you given help with advice, encouragement, moral or emotional support to friends, neighbors, co-workers?	1: Yes 2: No	Caregiving_give_advice_R4	Continuous
R4	Caregiving	paired	mv015re/nv015re	z_mv015re	R4 During the past month have you given help with advice, encouragement, moral or emotional support to sons or daughters 19 and older?	1: Yes 2: No	Caregiving_give_advice_R4	Continuous
R4	Caregiving	paired	mv016re/nv016re	z_mv016re	R4 During the past month have you given help with advice, encouragement, moral or emotional support to parents?	1: Yes 2: No	Caregiving_give_advice_R4	Continuous
R4	Caregiving	paired	mv017re/nv017re	z_mv017re	R4 During the past month have you given help with advice, encouragement, moral or emotional support to brothers or sisters?	1: Yes 2: No	Caregiving_give_advice_R4	Continuous
R4	Caregiving	paired	mv018re/nv018re	z_mv018re	R4 During the past month have you given help with advice, encouragement, moral or emotional support to relatives other than children, parents, siblings, or spouse?	1: Yes 2: No	Caregiving_give_advice_R4	Continuous
R4	Caregiving	paired	mv053rer/nv067rer	z_mv053rer	R4 Is there a person in your family, including a spouse, with whom you can really share your very private feelings and concerns?	1: Yes 2: No	Support_family_R4	Factor(Binary)
R4	Caregiving	paired	mv054rer/nv068rer	z_mv054rer	R4 Is there a friend outside your family with whom you can really share your very private feelings and concerns?	1: Yes 2: No	Support_social_R4	Factor(Binary)
R4	Caregiving	paired	mv056re/nv050re	z_mv056re	R4 Suppose you had to borrow $250 for a few weeks because of an emergency. Could you ask for help from friends, neighbors, co-workers?	1: Yes 2: No	Support_money_R4	Continuous
R4	Caregiving	paired	mv057re/nv051re	z_mv057re	R4 Suppose you had to borrow $250 for a few weeks because of an emergency. Could you ask for help from sons or daughters 19 and older?	1: Yes 2: No	Support_money_R4	Continuous
R4	Caregiving	paired	mv058re/nv052re	z_mv058re	R4 Suppose you had to borrow $250 for a few weeks because of an emergency. Could you ask for help from parents?	1: Yes 2: No	Support_money_R4	Continuous
R4	Caregiving	paired	mv059re/nv053re	z_mv059re	R4 Suppose you had to borrow $250 for a few weeks because of an emergency. Could you ask for help from brothers or sisters?	1: Yes 2: No	Support_money_R4	Continuous
R4	Caregiving	paired	mv060re/nv054re	z_mv060re	R4 Suppose you had to borrow $250 for a few weeks because of an emergency. Could you ask for help from relatives other than children, parents, or siblings?	1: Yes 2: No	Support_money_R4	Continuous
R4	Caregiving	paired	mv062re/nv056re	z_mv062re	R4 Suppose you had a personal problem, and you wanted to talk to someone about it. Could you ask for help or advice from friends, neighbors, co-workers?	1: Yes 2: No	Support_problem_R4	Continuous
R4	Caregiving	paired	mv063re/nv057re	z_mv063re	R4 Suppose you had a personal problem, and you wanted to talk to someone about it. Could you ask for help or advice from sons or daughters 19 and older?	1: Yes 2: No	Support_problem_R4	Continuous
R4	Caregiving	paired	mv064re/nv058re	z_mv064re	R4 Suppose you had a personal problem, and you wanted to talk to someone about it. Could you ask for help or advice from parents?	1: Yes 2: No	Support_problem_R4	Continuous
R4	Caregiving	paired	mv065re/nv059re	z_mv065re	R4 Suppose you had a personal problem, and you wanted to talk to someone about it. Could you ask for help or advice from brothers or sisters?	1: Yes 2: No	Support_problem_R4	Continuous
R4	Caregiving	paired	mv066re/nv060re	z_mv066re	R4 Suppose you had a personal problem, and you wanted to talk to someone about it. Could you ask for help or advice from relatives other than children, parents, or siblings?	1: Yes 2: No	Support_problem_R4	Continuous
R4	Caregiving	paired	mv068re/nv062re	z_mv068re	R4 Suppose you were sick and unable to take care of yourself for a week or more. Could you ask for help from friends, neighbors, co-workers?	1: Yes 2: No	Support_sick_R4	Continuous
R4	Caregiving	paired	mv069re/nv063re	z_mv069re	R4 Suppose you were sick and unable to take care of yourself for a week or more. Could you ask for help from sons or daughters 19 and older?	1: Yes 2: No	Support_sick_R4	Continuous
R4	Caregiving	paired	mv070re/nv064re	z_mv070re	R4 Suppose you were sick and unable to take care of yourself for a week or more. Could you ask for help from parents?	1: Yes 2: No	Support_sick_R4	Continuous
R4	Caregiving	paired	mv071re/nv065re	z_mv071re	R4 Suppose you were sick and unable to take care of yourself for a week or more. Could you ask for help from brothers or sisters?	1: Yes 2: No	Support_sick_R4	Continuous
R4	Caregiving	paired	mv072re/nv066re	z_mv072re	R4 Suppose you were sick and unable to take care of yourself for a week or more. Could you ask for help from relatives other than children, parents, or siblings?	1: Yes 2: No	Support_sick_R4	Continuous
R4	Social Participation	paired	mz001rer/nz024rer	z_mz001rer	R4 Were any of the organizational participation questions answered?	1: Yes 2: No	Support_sick_R4	Continuous
R4	Social Participation	paired	mz002rer/nz002rer	z_mz002rer	R4 What is your level of involvement with church-connected groups, but not the church itself?	0: Not Involved 1: Very Little 2: Some 3: Quite A Bit 4: Great Deal	Social_church1_R4	Continuous
R4	Social Participation	paired	mz004rer/nz003rer	z_mz004rer	R4 What is your level of involvement with labor unions?	0: Not Involved 1: Very Little 2: Some 3: Quite A Bit 4: Great Deal	Social_union_R4	Continuous
R4	Social Participation	paired	mz005rer/nz004rer	z_mz005rer	R4 What is your level of involvement with veterans' organizations?	0: Not Involved 1: Very Little 2: Some 3: Quite A Bit 4: Great Deal	Social_veteran_R4	Continuous
R4	Social Participation	paired	mz006rer/nz005rer	z_mz006rer	R4 What is your level of involvement with fraternal organizations or lodges?	0: Not Involved 1: Very Little 2: Some 3: Quite A Bit 4: Great Deal	Social_fraternal_R4	Continuous
R4	Social Participation	paired	mz007rer/nz006rer	z_mz007rer	R4 What is your level of involvement with business or civic groups?	0: Not Involved 1: Very Little 2: Some 3: Quite A Bit 4: Great Deal	Social_business_R4	Continuous
R4	Social Participation	paired	mz008rer/nz007rer	z_mz008rer	R4 What is your level of involvement with parent-teachers' associations?	0: Not Involved 1: Very Little 2: Some 3: Quite A Bit 4: Great Deal	Social_pta_R4	Continuous
R4	Social Participation	paired	mz009rer/nz008rer	z_mz009rer	R4 What is your level of involvement with community centers?	0: Not Involved 1: Very Little 2: Some 3: Quite A Bit 4: Great Deal	Social_community_R4	Continuous
R4	Social Participation	paired	mz010rer/nz009rer	z_mz010rer	R4 What is your level of involvement with organizations of people of the same nationality?	0: Not Involved 1: Very Little 2: Some 3: Quite A Bit 4: Great Deal	Social_nationality_R4	Continuous
R4	Social Participation	paired	mz011rer/nz010rer	z_mz011rer	R4 What is your level of involvement with sport teams?	0: Not Involved 1: Very Little 2: Some 3: Quite A Bit 4: Great Deal	Social_sport_R4	Continuous
R4	Social Participation	paired	mz012rer/nz011rer	z_mz012rer	R4 What is your level of involvement with country clubs?	0: Not Involved 1: Very Little 2: Some 3: Quite A Bit 4: Great Deal	Social_countryclub_R4	Continuous
R4	Social Participation	paired	mz013rer/nz012rer	z_mz013rer	R4 What is your level of involvment with youth groups, for example as a Scout leader?	0: Not Involved 1: Very Little 2: Some 3: Quite A Bit 4: Great Deal	Social_youth_R4	Continuous
R4	Social Participation	paired	mz014rer/nz013rer	z_mz014rer	R4 What is your level of involvement with professional groups?	0: Not Involved 1: Very Little 2: Some 3: Quite A Bit 4: Great Deal	Social_profesional_R4	Continuous
R4	Social Participation	paired	mz015rer/nz014rer	z_mz015rer	R4 What is your level of involvement with political clubs or organizations?	0: Not Involved 1: Very Little 2: Some 3: Quite A Bit 4: Great Deal	Social_political_R4	Continuous
R4	Social Participation	paired	mz016rer/nz015rer	z_mz016rer	R4 What is your level of involvement with neighborhood improvement organizations?	0: Not Involved 1: Very Little 2: Some 3: Quite A Bit 4: Great Deal	Social_neighborhood_R4	Continuous
R4	Social Participation	paired	mz017rer/nz016rer	z_mz017rer	R4 What is your level of involvement with charity or welfare organizations?	0: Not Involved 1: Very Little 2: Some 3: Quite A Bit 4: Great Deal	Social_charity_R4	Continuous
R4	Social Participation	paired	mz018rer/nz017rer	z_mz018rer	R4 What is your level of involvement with hobby groups?	0: Not Involved 1: Very Little 2: Some 3: Quite A Bit 4: Great Deal	Social_hobby_R4	Continuous
R4	Social Participation	paired	mz023rer/nz022rer	z_mz023rer	R4 How many times, if at all, during the past four weeks have you gotten together with friends? We mean like going out together or visiting in each other's homes.	0~44	Social_friends_R4	Continuous
R4	Social Participation	paired	mz024rer/nz023rer	z_mz024rer	R4 How many times, if at all, during the past four weeks have you gotten together socially with relatives?	0~60	Social_relatives_R4	Continuous
R5	Marriage roster	paired	gc001re/cc001re	z_gc001re	R5 Current marital status.	1: Married, 2: Separated, 3: Divorced, 4: Widowed, 5: Never Married	Marital_status_R5	Factor(Categorical)
R5	Marriage roster	paired	gc004re/cc004re	z_gc004re	R5 Marital history.	1: Currently Married, Married Only Once, 2: Currently Married, Married More than Once, 3: Separated, Married Only Once, 4: Separated, Married More than Once, 5: Divorced, Married Only Once, 6: Divorced, Married More than Once, 7: Widowed, Married Only Once, 8: Widowed, Married More than Once, 9: Single, Never Married	Marital_history_R5	Factor(Categorical)
R5	Marriage roster	paired	gc040re/cc040re	z_gc040re	R5 How close are you and your current spouse?	1: Not At All Close 2: Not Very Close 3: Somewhat Close 4: Very Close	Spouse_close_R5	Continuous
R5	Children	paired	gd001kd/cd001kd	z_gd001kd	R5 Total number of respondent's children. Include biological, adopted, step or foster children as well as other children respondent considered to be a part of his/her family.		Children_num_R5	Continuous
R5	Siblings	paired	gk001ss/ck001ss	z_gk001ss	R5 Mortality status of (reciprocal) selected sibling.	1: Alive 2: Deceased	Sibling_R5	Factor(Binary)
R5	Siblings	paired	gk059ssf/ck059ssf	z_gk059ssf	R5 Number of times in last 12 months you had contact with your selected sibling.		Sibling_contact_R5	Continuous
R5	Siblings	paired	gk062ssd/ck062ssd	z_gk062ssd	R5 How close does respondent feel towards selected sibling?	1: Very Close 2: Somewhat Close 3: Not Very Close 4: Not At All Close	Sibling_close_R5	Continuous
R5	Parents	paired	ge050ma/ce050ma	z_ge050ma	R5 Is your mother alive?	1: Yes 2: No	Family_mother_R5	Factor(Binary)
R5	Parents	paired	ge061mab/ce061mab	z_ge061mab	R5 How close are you and your mother?	1: Very Close 2: Somewhat Close 3: Not Very Close 4: Not At All Close	Family_mother_close_R5	Continuous
R5	Parents	paired	ge062fa/ce062fa	z_ge062fa	R5 Is your father alive?	1: Yes 2: No	Family_father_R5	Factor(Binary)
R5	Parents	paired	ge073fab/ce073fab	z_ge073fab	R5 How close are you to your father?	1: Very Close 2: Somewhat Close 3: Not Very Close 4: Not At All Close	Family_father_close_R5	Continuous
R5	Household	paired	ge001he/ce001he	z_ge001he	R5 Number of household members. Includes the respondent.		Family_num_R5	Continuous
R5	Household	paired	ge002he/ce002he	z_ge002he	R5 Number of household members with any physical or mental condition, illness, or disability which limits what they are able to do. Includes respondent.		Family_num_ill_R5	Continuous
R5	Religion	paired	gl004rec/cl004rec	z_gl004rec	R5 Frequency of religious attendance converted to total times in the past year.		Religion_attendance_R5	Continuous
R5	Social Relationships	paired	iv053rer/dv053rer	z_iv053rer	R5 Is there a person in your family with whom you can really share your very private feelings and concerns?	1: Yes 2: No	Support_family_R5	Factor(Binary)
R5	Social Relationships	paired	iv054rer/dv054rer	z_iv054rer	R5 Is there a friend outside your family with whom you can really share your very private feelings and concerns?	1: Yes 2: No	Support_social_R5	Factor(Binary)
R5	Social Relationships	paired	iv201rer/dv201rer	z_iv201rer	R5 How much do friends and relatives, other than your spouse or your children, make you feel loved and cared for?	1: None 2: A Little 3: Some 4: Quite A Bit 5: A Lot	Love_social_R5	Continuous
R5	Social Relationships	paired	iv202rer/dv202rer	z_iv202rer	R5 How much do friends and relatives, other than your spouse or your children, make too many demands on you?	1: None 2: A Little 3: Some 4: Quite A Bit 6: A Lot	Burden_social_R5	Continuous
R5	Social Relationships	paired	iv203rer/dv203rer	z_iv203rer	R5 How much are friends and relatives, other than your spouse or your children, willing to listen to you when you need to talk about your worries or problems?	1: None 2: A Little 3: Some 4: Quite A Bit 7: A Lot	Listen_social_R5	Continuous
R5	Social Relationships	paired	iv204rer/dv204rer	z_iv204rer	R5 How much are friends and relatives, other than your spouse or your children, critical of what you do?	1: None 2: A Little 3: Some 4: Quite A Bit 8: A Lot	Critical_social_R5	Continuous
R5	Social Relationships	paired	iv014re/dv014re	z_iv014re	R5 During the past month, did you give a friend, neighbor, or co-worker advice, encouragement, moral or emotional support?	1: Yes 2: No	Caregiving_give_advice_R5	Continuous
R5	Social Relationships	paired	iv015re/dv015re	z_iv015re	R5 During the past month, did you give your sons or daughters who are 19 or older advice, encouragement, moral or emotional support?	1: Yes 2: No	Caregiving_give_advice_R5	Continuous
R5	Social Relationships	paired	iv016re/dv016re	z_iv016re	R5 During the past month, did you give your parents advice, encouragement, moral or emotional support?	1: Yes 2: No	Caregiving_give_advice_R5	Continuous
R5	Social Relationships	paired	iv017re/dv017re	z_iv017re	R5 During the past month, did you give your brothers of sisters advice, encouragement, moral or emotional support?	1: Yes 2: No	Caregiving_give_advice_R5	Continuous
R5	Social Relationships	paired	iv103rer/dv103rer	z_iv103rer	R5 During the past month, did you give your grandchildren advice, encouragement, moral or emotional support?	1: Yes 2: No	Caregiving_give_advice_R5	Continuous
R5	Social Relationships	paired	iv018re/dv018re	z_iv018re	R5 During the past month, did you give relatives, other than sons, daughters, parents, brothers, sisters or grandchildren, advice, encouragement, moral or emotional support?	1: Yes 2: No	Caregiving_give_advice_R5	Continuous
R5	Social Relationships	paired	iv056re/dv056re	z_iv056re	R5 If you had to borrow $250 for a few weeks because of an emergency, could you ask a friend, neighbor or co-worker for help?	1: Yes 2: No	Support_money_R5	Continuous
R5	Social Relationships	paired	iv057re/dv057re	z_iv057re	R5 If you had to borrow $250 for a few weeks because of an emergency, could you ask your sons or daughters 19 or older for help?	1: Yes 2: No	Support_money_R5	Continuous
R5	Social Relationships	paired	iv058re/dv058re	z_iv058re	R5 If you had to borrow $250 for a few weeks because of an emergency, could you ask your parents for help?	1: Yes 2: No	Support_money_R5	Continuous
R5	Social Relationships	paired	iv059re/dv059re	z_iv059re	R5 If you had to borrow $250 for a few weeks because of an emergency, could you ask your brothers or sisters for help?	1: Yes 2: No	Support_money_R5	Continuous
R5	Social Relationships	paired	iv108rer/dv108rer	z_iv108rer	R5 If you had to borrow $250 for a few weeks because of an emergency, could you ask your grandchildren for help?	1: Yes 2: No	Support_money_R5	Continuous
R5	Social Relationships	paired	iv060re/dv060re	z_iv060re	R5 If you had to borrow $250 for a few weeks because of an emergency, could you ask relatives, other than sons, daughters, parents, brothers, sisters or grandchildren, for help?	1: Yes 2: No	Support_money_R5	Continuous
R5	Social Relationships	paired	iv062re/dv062re	z_iv062re	R5 If you had a personal problem, and you wanted to talk to someone about it, could you ask friends, neighbors, or co-workers for help or advice?	1: Yes 2: No	Support_problem_R5	Continuous
R5	Social Relationships	paired	iv063re/dv063re	z_iv063re	R5 If you had a personal problem, and you wanted to talk to someone about it, could you ask your sons or daughters 19 or older for help or advice?	1: Yes 2: No	Support_problem_R5	Continuous
R5	Social Relationships	paired	iv064re/dv064re	z_iv064re	R5 If you had a personal problem, and you wanted to talk to someone about it, could you ask your parents for help or advice?	1: Yes 2: No	Support_problem_R5	Continuous
R5	Social Relationships	paired	iv065re/dv065re	z_iv065re	R5 If you had a personal problem, and you wanted to talk to someone about it, could you ask your brothers or sisters for help or advice?	1: Yes 2: No	Support_problem_R5	Continuous
R5	Social Relationships	paired	iv109rer/dv109rer	z_iv109rer	R5 If you had a personal problem, and you wanted to talk to someone about it, could you ask your grandchildren for help or advice?	1: Yes 2: No	Support_problem_R5	Continuous
R5	Social Relationships	paired	iv066re/dv066re	z_iv066re	R5 If you had a personal problem, and you wanted to talk to someone about it, could you ask relatives, other than sons, daughters, parents, brothers, sisters or grandchildren, for help or advice?	1: Yes 2: No	Support_problem_R5	Continuous
R5	Social Relationships	paired	iv068re/dv068re	z_iv068re	R5 If you were sick and unable to take care of yourself for a week or more, could you ask friends, neighbors or co-workers for help?	1: Yes 2: No	Support_sick_R5	Continuous
R5	Social Relationships	paired	iv069re/dv069re	z_iv069re	R5 If you were sick and unable to take care of yourself for a week or more, could you ask your sons or daughters 19 or older for help?	1: Yes 2: No	Support_sick_R5	Continuous
R5	Social Relationships	paired	iv070re/dv070re	z_iv070re	R5 If you were sick and unable to take care of yourself for a week or more, could you ask your parents for help?	1: Yes 2: No	Support_sick_R5	Continuous
R5	Social Relationships	paired	iv071re/dv071re	z_iv071re	R5 If you were sick and unable to take care of yourself for a week or more, could you ask your brothers or sisters for help?	1: Yes 2: No	Support_sick_R5	Continuous
R5	Social Relationships	paired	iv110rer/dv110rer	z_iv110rer	R5 If you were sick and unable to take care of yourself for a week or more, could you ask your grandchildren for help?	1: Yes 2: No	Support_sick_R5	Continuous
R5	Social Relationships	paired	iv072re/dv072re	z_iv072re	R5 If you were sick and unable to take care of yourself for a week or more, could you ask relatives, other than sons, daughters, parents, brothers, sisters or grandchildren, for help?	1: Yes 2: No	Support_sick_R5	Continuous
R5	Social and Civic Participation	paired	iz023rer/dz023rer	z_iz023rer	R5 How many times, if at all, during the past four weeks have you gotten together with friends? We mean like going out together or visiting in each other's homes.		Social_friends_R5	Continuous
R5	Social and Civic Participation	paired	iz024rer/dz024rer	z_iz024rer	R5 How many times, if at all, during the past four weeks have you gotten together socially with relatives?		Social_relatives_R5	Continuous
R5	Social and Civic Participation	paired			R5 Total Number of Social Involvement		Social_involvement_R5	Continuous
R5	Social and Civic Participation	paired	iz002rer/dz002rer	z_iz002rer	R5 What is your level of involvement with church-connected groups, but not the church itself?	1: Not Involved 2: Very Little 3: Some 4: Quite A Bit 5: A Great Deal	Social_church1_R5	Continuous
R5	Social and Civic Participation	paired	iz003rer/dz003rer	z_iz003rer	R5 What is your level of involvement with a church, temple or other place of worship.	1: Not Involved 2: Very Little 3: Some 4: Quite A Bit 5: A Great Deal	Social_church2_R5	Continuous
R5	Social and Civic Participation	paired	iz004rer/dz004rer	z_iz004rer	R5 What is your level of involvement in labor unions?	1: Not Involved 2: Very Little 3: Some 4: Quite A Bit 5: A Great Deal	Social_union_R5	Continuous
R5	Social and Civic Participation	paired	iz005rer/dz005rer	z_iz005rer	R5 What is your level of involvement with veterans' organizations?	1: Not Involved 2: Very Little 3: Some 4: Quite A Bit 5: A Great Deal	Social_veteran_R5	Continuous
R5	Social and Civic Participation	paired	iz006rer/dz006rer	z_iz006rer	R5 What is your level of involvement with fraternal organizations or lodges?	1: Not Involved 2: Very Little 3: Some 4: Quite A Bit 5: A Great Deal	Social_fraternal_R5	Continuous
R5	Social and Civic Participation	paired	iz007rer/dz007rer	z_iz007rer	R5 What is your level of involvement with business or civic groups?	1: Not Involved 2: Very Little 3: Some 4: Quite A Bit 5: A Great Deal	Social_business_R5	Continuous
R5	Social and Civic Participation	paired	iz008rer/dz008rer	z_iz008rer	R5 What is your level of involvement with parent-teachers' associations?	1: Not Involved 2: Very Little 3: Some 4: Quite A Bit 5: A Great Deal	Social_pta_R5	Continuous
R5	Social and Civic Participation	paired	iz009rer/dz009rer	z_iz009rer	R5 What is your level of involvement with community centers?	1: Not Involved 2: Very Little 3: Some 4: Quite A Bit 5: A Great Deal	Social_community_R5	Continuous
R5	Social and Civic Participation	paired	iz010rer/dz010rer	z_iz010rer	R5 What is your level of involvement with organizations of people of the same nationality?	1: Not Involved 2: Very Little 3: Some 4: Quite A Bit 5: A Great Deal	Social_nationality_R5	Continuous
R5	Social and Civic Participation	paired	iz011rer/dz011rer	z_iz011rer	R5 What is your level of involvement with sports teams?	1: Not Involved 2: Very Little 3: Some 4: Quite A Bit 5: A Great Deal	Social_sport_R5	Continuous
R5	Social and Civic Participation	paired	iz012rer/dz012rer	z_iz012rer	R5 What is your level of involvement with country clubs?	1: Not Involved 2: Very Little 3: Some 4: Quite A Bit 5: A Great Deal	Social_countryclub_R5	Continuous
R5	Social and Civic Participation	paired	iz013rer/dz013rer	z_iz013rer	R5 What is your level of involvement with youth groups, for example as a Scout leader?	1: Not Involved 2: Very Little 3: Some 4: Quite A Bit 5: A Great Deal	Social_youth_R5	Continuous
R5	Social and Civic Participation	paired	iz014rer/dz014rer	z_iz014rer	R5 What is your level of involvement with professional groups?	1: Not Involved 2: Very Little 3: Some 4: Quite A Bit 5: A Great Deal	Social_profesional_R5	Continuous
R5	Social and Civic Participation	paired	iz015rer/dz015rer	z_iz015rer	R5 What is your level of involvement with political clubs or organizations?	1: Not Involved 2: Very Little 3: Some 4: Quite A Bit 5: A Great Deal	Social_political_R5	Continuous
R5	Social and Civic Participation	paired	iz016rer/dz016rer	z_iz016rer	R5 What is your level of involvement with neighborhood improvement organizations?	1: Not Involved 2: Very Little 3: Some 4: Quite A Bit 5: A Great Deal	Social_neighborhood_R5	Continuous
R5	Social and Civic Participation	paired	iz017rer/dz017rer	z_iz017rer	R5 What is your level of involvement with charity or welfare organizations?	1: Not Involved 2: Very Little 3: Some 4: Quite A Bit 5: A Great Deal	Social_charity_R5	Continuous
R5	Social and Civic Participation	paired	iz018rer/dz018rer	z_iz018rer	R5 What is your level of involvement with hobby groups?	1: Not Involved 2: Very Little 3: Some 4: Quite A Bit 5: A Great Deal	Social_hobby_R5	Continuous
Healthcare access and quality
R4	Health Insurance Summary	paired	rs010re/ss010re	z_rs010re	R4 Is respondent currently covered by health insurance offered by a current or former employer or union?	1: Yes 2: No	HealthInsurance_employer_R4	Factor(Binary)
R4	Health Insurance Summary	paired	rs011re/ss011re	z_rs011re	R4 Is respondent covered by any health insurance through spouse's current or former employer or union?	1: Yes 2: No	HealthInsurance_viaSpouse_R4	Factor(Binary)
R4	Health Insurance Summary	paired	rs012re/ss012re	z_rs012re	R4 Does respondent have any type of health insurance coverage such as Blue-Cross/Blue-Shield obtained directly from an insurance company and not from an employer?	1: Yes 2: No	HealthInsurance_private_R4	Factor(Binary)
R4	Health Insurance Summary	paired	rs013re/ss013re	z_rs013re	R4 Is respondent covered by any health insurance other than health insurance offered by your current or former employer or union, health insurance through spouse's current or former employer or union, or health insurance coverage such as Blue-Cross/Blue-Shield obtained directly from an insurance company and not from an employer?	1: Yes 2: No	HealthInsurance_other_R4	Factor(Binary)
R5	Access to Health Care and Insurance	paired	gsprvrec/csprvrec	z_gsprvrec	R5 Total number of private health insurance plans.		HealthInsurance_num_private_R5	Continuous
R5	Access to Health Care and Insurance	paired	gspubrec/cspubrec	z_gspubrec	R5 Total number of public health insurance plans.		HealthInsurance_num_public_R5	Continuous
R5	Access to Health Care and Insurance	paired	gstotrec/cstotrec	z_gstotrec	R5 Total number of health insurance plans.		HealthInsurance_num_R5	Continuous
R5	Access to Health Care and Insurance	paired	gshhirec/cshhirec	z_gshhirec	R5 Type of health insurance.	1: Medicare, 2: Medicare & Private, 3: Medicare & Other Public, 4: Private-Employment Related, 5: Private-Direct Purchase, 7: Military Insurance, 8: Other Governmental Insurance, 9: Uninsured	HealthInsurance_type_R5	Factor(Categorical)
R5	Access to Health Care and Insurance	paired	gsu00re/csu00re	z_gsu00re	R5 Is there a doctor's office or other medical facility that you usually go to when you are sick or need advice about your health?	1: Yes 2: NO, THERE IS NO USUAL PLACE 3: NO, THERE IS MORE THAN ONE PLACE (VOL) 4: YES, NEVER WENT THERE	Doctor_office_R5	Factor(Categorical)
R5	Access to Health Care and Insurance	paired	gsuscrec/csuscrec	z_gsuscrec	R5 Do you have at least one medical provider you usually go to when you are sick or need advice about your health?	0: No Usual Place 1: At Least One Usual Place	Doctor_R5	Factor(Binary)
R5	Access to Health Care and Insurance	paired	gsu27rec/csu27rec	z_gsu27rec	R5 How many years have you been going to the medical facility you currently go to most often when you are sick or need advice about your health?		Doctor_years_R5	Continuous
R5	Health and Health Behaviors	paired	ixha16re/dxha16re	z_ixha16re	R5 Thinking about your own health care, how would you rate the convenience of location of the doctor's office?	1: Poor 2: Fair 3: Good 4: Very Good 5: Excellent	HealthCare_convenience_R5	Continuous
R5	Health and Health Behaviors	paired	ixha17re/dxha17re	z_ixha17re	R5 Thinking about your own health care, how would you rate the hours when the doctor's office is open?	1: Poor 2: Fair 3: Good 4: Very Good 5: Excellent	HealthCare_convenience_R5	Continuous
R5	Health and Health Behaviors	paired	ixha18re/dxha18re	z_ixha18re	R5 Thinking about your own health care, how would you rate your access to specialty care if you needed it?	1: Poor 2: Fair 3: Good 4: Very Good 5: Excellent	HealthCare_convenience_R5	Continuous
R5	Health and Health Behaviors	paired	ixha19re/dxha19re	z_ixha19re	R5 Thinking about your own health care, how would you rate your access to hospital care if you needed it?	1: Poor 2: Fair 3: Good 4: Very Good 5: Excellent	HealthCare_convenience_R5	Continuous
R5	Health and Health Behaviors	paired	ixha20re/dxha20re	z_ixha20re	R5 Thinking about your own health care, how would you rate your access to medical care in an emergency?	1: Poor 2: Fair 3: Good 4: Very Good 5: Excellent	HealthCare_convenience_R5	Continuous
R5	Health and Health Behaviors	paired	ixha21re/dxha21re	z_ixha21re	R5 Thinking about your own health care, how would you rate your access to mental health care if you needed it?	1: Poor 2: Fair 3: Good 4: Very Good 5: Excellent	HealthCare_convenience_R5	Continuous
R5	Health and Health Behaviors	paired	ixha22re/dxha22re	z_ixha22re	R5 Thinking about your own health care, how would you rate arrangements for making appointments for medical care by phone?	1: Poor 2: Fair 3: Good 4: Very Good 5: Excellent	HealthCare_convenience_R5	Continuous
R5	Health and Health Behaviors	paired	ixha23re/dxha23re	z_ixha23re	R5 Thinking about your own health care, how would you rate the length of time spent waiting at the office to see the doctor?	1: Poor 2: Fair 3: Good 4: Very Good 5: Excellent	HealthCare_convenience_R5	Continuous
R5	Health and Health Behaviors	paired	ixha24re/dxha24re	z_ixha24re	R5 Thinking about your own health care, how would you rate the length of time you wait between making an appointment for routine care and the day of your visit?	1: Poor 2: Fair 3: Good 4: Very Good 5: Excellent	HealthCare_convenience_R5	Continuous
R5	Health and Health Behaviors	paired	ixha25re/dxha25re	z_ixha25re	R5 Thinking about your own health care, how would you rate the availability of medical information or advice by phone?	1: Poor 2: Fair 3: Good 4: Very Good 5: Excellent	HealthCare_convenience_R5	Continuous
R5	Health and Health Behaviors	paired	ixha26re/dxha26re	z_ixha26re	R5 Thinking about your own health care, how would you rate your access to medical care whenever you need it?	1: Poor 2: Fair 3: Good 4: Very Good 5: Excellent	HealthCare_convenience_R5	Continuous
R5	Health and Health Behaviors	paired	ixha27re/dxha27re	z_ixha27re	R5 Thinking about your own health care, how would you rate the services available for getting prescriptions filled?	1: Poor 2: Fair 3: Good 4: Very Good 5: Excellent	HealthCare_convenience_R5	Continuous
R5	Health and Health Behaviors	paired	ixha28re/dxha28re	z_ixha28re	R5 Thinking about your own health care, how would you rate the ease of seeing the doctor of your choice?	1: Poor 2: Fair 3: Good 4: Very Good 5: Excellent	HealthCare_convenience_R5	Continuous
R5	Health and Health Behaviors	paired	ixha29re/dxha29re	z_ixha29re	R5 Thinking about your own health care, how would you rate the amount of time you have with doctors and staff during a visit?	1: Poor 2: Fair 3: Good 4: Very Good 5: Excellent	HealthCare_convenience_R5	Continuous
R5	Health and Health Behaviors	paired	ixha30re/dxha30re	z_ixha30re	R5 Thinking about your own health care, how would you rate the overall quality of care and services?	1: Poor 2: Fair 3: Good 4: Very Good 5: Excellent	HealthCare_convenience_R5	Continuous
R5	Health and Health Behaviors	paired	ixha31re/dxha31re	z_ixha31re	R5 Thinking about your own health care, how would you rate the amount you pay out-of-pocket, for example, co-payments, deductibles or payments for services not covered by your plan?	1: Poor 2: Fair 3: Good 4: Very Good 5: Excellent	HealthCare_convenience_R5	Continuous
R5	Health and Health Behaviors	paired	itooprec/dtooprec	z_itooprec	R5 Total out-of-pocket expenses for prescriptions, mental health visits, dental care, and other medical care.		Health_cost_R5	Continuous
R5	Health and Health Behaviors	paired	idiffrec/ddiffrec	z_idiffrec	R5 Did Respondent answer 'yes' to any of the items in the 'Difficulty Obtaining Healthcare' series?	1: Yes 2: No	HealthCare_difficulty_R5	Factor(Binary)
R5	Health and Health Behaviors	paired	ixi01rer/dxi01rer	z_ixi01rer	R5 Have you ever used the Internet to look for advice or information about your health or health care?	1: Yes 2: No	HealthCare_internet_R5	Factor(Binary)
Health behavior
R4	Health	paired	mx005rer/nx017rer	z_mx005rer	R4 How often do you participate in light physical activity such as walking, dancing, gardening, golfing, bowling, etc.?	1: THREE OR MORE TIMES PER WEEK, 2: ONCE OR TWICE PER WEEK, 3: ABOUT ONE TO THREE TIMES PER MONTH, 4: LESS THAN ONCE PER MONTH	Sports_light_R4	Continuous
R4	Health	paired	mx006rer/nx018rer	z_mx006rer	R4 How often do you participate in vigorous physical exercise or sports such as aerobics, running, swimming, bicycling, etc.?	1: THREE OR MORE TIMES PER WEEK, 2: ONCE OR TWICE PER WEEK, 3: ABOUT ONE TO THREE TIMES PER MONTH, 4: LESS THAN ONCE PER MONTH	Sports_heavy_R4	Continuous
R4	Health	paired	mx012rer/nx038rer	z_mx012rer	R4 Have you ever smoked cigarettes regularly?	1: Yes 2: No	Smoke_ever_R4	Factor(Binary)
R5	Internet	paired	gm001he/cm001he	z_gm001he	R5 Is there a computer, desktop or laptop, in the your household that someone uses?	1: Yes 2: No	Computer_household_R5	Factor(Binary)
R5	Internet	paired	gm010he/cm010he	z_gm010he	R5 Do you or anyone else in the household connect to the Internet from home?	1: Yes 2: No	Internet_household_R5	Factor(Binary)
R5	Internet	paired	gms02he/cms02he	z_gms02he	R5 Summary: has Respondent had a computer in his/her household within the past 5 years?	0: No 1: Yes	Computer_within5_R5	Factor(Binary)
R5	Health and Health Behaviors	paired	ixt01rer/dxt01rer	z_ixt01rer	R5 Have you ever smoked a pipe or cigars, or used snuff or chewing tobacco regularly in your entire life?	1: Yes 2: No	Smoke_ever_R5	Factor(Binary)
R5	Health and Health Behaviors	paired	ixt07rer/dxt07rer	z_ixt07rer	R5 How often do you smoke now?	1: Every Day, 2: Some Days, 3: Not At All	Smoke_freq_R5	Continuous
R5	Health and Health Behaviors	paired	ixt12rer/dxt12rer	z_ixt12rer	R5 Other than yourself, does anyone regularly smoke cigarettes or other tobacco products inside your home?	1: Yes 2: No	Smoke_household_R5	Factor(Binary)
R5	Health and Health Behaviors	paired	ix012rer/dx012rer	z_ix012rer	R5 Have you ever smoked cigarettes regularly in your entire life?	1: Yes 2: No	Smoke_regularly_ever_R5	Factor(Binary)
R5	Health and Health Behaviors	paired	ix013rec/dx013rec	z_ix013rec	R5 Do you currently smoke?	1: Yes 2: No	Smoke_now_R5	Factor(Binary)
R5	Health and Health Behaviors	paired	ixj01rer/dxj01rer	z_ixj01rer	R5 At your current or most recent job, did anyone, other than yourself, regularly smoke cigarettes or other tobacco products in your immediate work area?	1: Yes 2: No	Smoke_work_R5	Factor(Binary)
R5	Health and Health Behaviors	paired	ixe01rer/dxe01rer	z_ixe01rer	R5 How many hours per month do you participate in light physical activities, either alone or with others?		Sports_light_hours_R5	Continuous
R5	Health and Health Behaviors	paired	ixe02rer/dxe02rer	z_ixe02rer	R5 How many hours per month do you participate in vigorous physical activities, either alone or with others?		Sports_heavy_hours_R5	Continuous
R5	Social and Civic Participation	paired	iz114rer/dz114rer	z_iz114rer	R5 During the past year, how many hours per week did you talk on the phone with friends or relatives?		Hobby_phone_R5	Continuous
R5	Social and Civic Participation	paired	iz108rer/dz108rer	z_iz108rer	R5 During the past year, how many hours per week did you watch television?		Hobby_TV_R5	Continuous
R5	Social and Civic Participation	paired	iz111rer/dz111rer	z_iz111rer	R5 During the past year, how many hours per week did you spend reading books, magazines, newspapers or other reading material?		Hobby_read_R5	Continuous
R5	Social and Civic Participation	paired	iz132rer/dz132rer	z_iz132rer	R5 During the past year, how many hours per month did you write letters, not including e-mail?		Hobby_letters_R5	Continuous
R5	Social and Civic Participation	paired	iz135rer/dz135rer	z_iz135rer	R5 During the past year, how many hours per month did you play cards or board games, including games on a computer?		Hobby_game_R5	Continuous
R5	Social and Civic Participation	paired	iz138rer/dz138rer	z_iz138rer	R5 During the past year, how many hours per month did you paint, draw, or do another form of art?		Hobby_art_R5	Continuous
R5	Social and Civic Participation	paired	iz141rer/dz141rer	z_iz141rer	R5 During the past year, how many hours per month did you play a musical instrument?		Hobby_music_R5	Continuous
R5	Social and Civic Participation	paired	iz144rer/dz144rer	z_iz144rer	R5 During the past year, how many hours per month did you spend going to the movies?		Hobby_movie_R5	Continuous
R5	Social and Civic Participation	paired	iz147rer/dz147rer	z_iz147rer	R5 During the past year, how many hours per month did you spend going to a lecture, concert, play, museum or other similar activity?		Hobby_museum_R5	Continuous
R5	Social and Civic Participation	paired	iz150rer/dz150rer	z_iz150rer	R5 During the past year, how many hours per month did you spend going out to a restaurant or bar?		Hobby_bar_R5	Continuous
R5	Social and Civic Participation	paired	iz153rer/dz153rer	z_iz153rer	R5 During the past year, how many hours per month did you work on a crossword puzzle or other word game?		Hobby_puzzle_R5	Continuous
R5	Social and Civic Participation	paired	iz156rer/dz156rer	z_iz156rer	R5 During the past year, how many hours per month did you do crafts or hobbies such as needlework, woodworking, model trains, jigsaw puzzles, etc.?		Hobby_craft_R5	Continuous
R5	Social and Civic Participation	paired	iz159rer/dz159rer	z_iz159rer	R5 During the past year, how many hours per month did you make home repairs, car repairs, or do other handy work?		Hobby_repair_R5	Continuous
R5	Social and Civic Participation	paired	iz162rer/dz162rer	z_iz162rer	R5 During the past year, how many hours per month did you hunt or fish in season?		Hobby_fish_R5	Continuous
R5	Social and Civic Participation	paired	iz165rer/dz165rer	z_iz165rer	R5 During the past year, how many hours per month did you spend doing light physical activities that you do alone, such as light housework, gardening, or walking by yourself?		Hobby_lightphysical_alone_R5	Continuous
R5	Social and Civic Participation	paired	iz168rer/dz168rer	z_iz168rer	R5 During the past year, how many hours per month did you do light physical activities that you do with others, such as walking with friends, bowling, playing softball or other team sports with light activity?		Hobby_lightphysical_tog_R5	Continuous
R5	Social and Civic Participation	paired	iz171rer/dz171rer	z_iz171rer	R5 During the past year, how many hours per month did you do vigorous physical activities that you do alone, such as jogging, swimming, biking, or going to the gym by yourself?		Hobby_heavyphysical_alone_R5	Continuous
R5	Social and Civic Participation	paired	iz174rer/dz174rer	z_iz174rer	R5 During the past year, how many hours per month did you do vigorous physical activities that you do with others such as playing team sports, jogging, swimming, biking, or going to the gym with friends?		Hobby_heavyphysical_tog_R5	Continuous
Psychological resources
R4	Psychological	paired	mn001rei/np001rei	z_mn001rei	R4 Summary score for autonomy, mean of valid items substituted for missing items. (Standardized)		Autonomy_R4_z	Continuous
R4	Psychological	paired	mn010rei/np010rei	z_mn010rei	R4 Summary score for environmental mastery, mean of valid items substituted for missing items. (Standardized)		EnvironmentalMastery_R4_z	Continuous
R4	Psychological	paired	mn019rei/np019rei	z_mn019rei	R4 Summary score for personal growth, mean of valid items substituted for missing items. (Standardized)		PersonalGrowth_R4_z	Continuous
R4	Psychological	paired	mn028rei/np028rei	z_mn028rei	R4 Summary score for positive relation to others, mean of valid items substituted for missing items. (Standardized)		PositiveRelationship_R4_z	Continuous
R4	Psychological	paired	mn037rei/np037rei	z_mn037rei	R4 Summary score for purpose in life, mean of valid items substituted for missing items. (Standardized)		PurposeinLife_R4_z	Continuous
R4	Psychological Well-Being	paired	rn014rei/sn014rei	z_rn014rei	R4 Summary score for Psychological Well-Being,mean imputed for missing components.		PsychWellbeing_R4	Continuous
R4	Psychological	paired	mn046rei/np046rei	z_mn046rei	R4 Summary score for self-acceptance, mean of valid items substituted for missing items. (Standardized)	The Higher, The Better: 7~42	SelfAcceptance_R4_z	Continuous
R5	Values And Attitudes	paired	in001rei/dn001rei	z_in001rei	R5 Summary score for autonomy, mean imputed for missing components.		Autonomy_R5	Continuous
R5	Values And Attitudes	paired	in010rei/dn010rei	z_in010rei	R5 Summary score for environmental mastery, mean imputed for missing components.		EnvironmentalMastery_R5	Continuous
R5	Values And Attitudes	paired	in019rei/dn019rei	z_in019rei	R5 Summary score for personal growth, mean imputed for missing components.		PersonalGrowth_R5	Continuous
R5	Values And Attitudes	paired	in028rei/dn028rei	z_in028rei	R5 Summary score for positive relation to others, imputed mean for missing components.		PositiveRelationship_R5	Continuous
R5	Values And Attitudes	paired	in037rei/dn037rei	z_in037rei	R5 Summary score for purpose in life, mean imputed for missing components.		PurposeinLife_R5	Continuous
R5	Values And Attitudes	paired	in046rei/dn046rei	z_in046rei	R5 Summary score for self-acceptance, mean imputed for missing components.		SelfAcceptance_R5	Continuous
R5	Values And Attitudes	paired	in070rec/dn070rec	z_in070rec	R5 Summary score for Optimism Index.		Optimism_R5	Continuous
R5	Values And Attitudes	paired	in072rec/dn072rec	z_in072rec	R5 Summary score for Mattering Index.		Mattering_R5	Continuous
Big 5 Personality
R4	Personality	paired	rh001rec/sh001rec	z_rh001rec	R4 Summary score for Extraversion. (Standardized)		Extraversion_R4_z	Continuous
R4	Personality	paired	rh003rec/sh003rec	z_rh003rec	R4 Summary score for Openness. (Standardized)		Openness_R4_z	Continuous
R4	Personality	paired	rh005rec/sh005rec	z_rh005rec	R4 Summary score for Neuroticism. (Standardized)		Neuroticism_R4_z	Continuous
R4	Personality	paired	rh007rec/sh007rec	z_rh007rec	R4 Summary score for Conscientiousness. (Standardized)		Conscientiousness_R4_z	Continuous
R4	Personality	paired	rh009rec/sh009rec	z_rh009rec	R4 Summary score for Agreeableness. (Standardized)		Agreeableness_R4_z	Continuous
R5	Values And Attitudes	paired	ih001rei/dh001rei	z_ih001rei	R5 Summary score for extraversion, mean imputed for missing components.		Extraversion_R5	Continuous
R5	Values And Attitudes	paired	ih009rei/dh009rei	z_ih009rei	R5 Summary score for agreeableness, mean imputed for missing components.		Agreeableness_R5	Continuous
R5	Values And Attitudes	paired	ih017rei/dh017rei	z_ih017rei	R5 Summary score for conscientiousness, mean imputed for missing components.		Conscientiousness_R5	Continuous
R5	Values And Attitudes	paired	ih025rei/dh025rei	z_ih025rei	R5 Summary score for neuroticism, mean imputed for missing components.		Neuroticism_R5	Continuous
R5	Values And Attitudes	paired	ih032rei/dh032rei	z_ih032rei	R5 Summary score for openness, imputed mean for missing components.		Openness_R5	Continuous
Environmental stressors
R4	Depression and Alcohol Summary	paired	ru037re/su037re	z_ru037re	R4 When you were growing up, did you ever live with anyone who was a problem drinker or alcoholic?	1: Yes 2: No	Alcohol_childhood_R4	Factor(Binary)
R4	Depression and Alcohol Summary	paired	ru038re/su038re	z_ru038re	R4 Did you ever live with anyone who was a problem drinker or alcoholic, other than when you were growing up?	1: Yes 2: No	Alcohol_live_R4	Factor(Binary)
R5	Alcohol	paired	gu037re/cu037re	z_gu037re	R5 When you were growing up, that is during your first 18 years, did you live with anyone who was a problem drinker or alcoholic?	1: Yes 2: No	Alcohol_childhood_R5	Factor(Binary)
R5	Alcohol	paired	gu038re/cu038re	z_gu038re	R5 Have you ever been married to, or lived with someone who was a problem drinker or alcoholic since you were 18?	1: Yes 2: No	Alcohol_live_R5	Factor(Binary)
R5	Health and Health Behaviors	paired	ixt02rer/dxt02rer	z_ixt02rer	R5 Up until you were 16 years old, did anyone in your household, other than yourself, smoke?	1: Yes 2: No	Smoke_childhood_R5	Factor(Binary)
R5	Dealing With Problems	paired	id001cre/dd001cre	z_id001cre	R5 Has a close friend ever died?	1: Yes 2: No	BadExperience_R5	Continuous
R5	Dealing With Problems	paired	id002cre/dd002cre	z_id002cre	R5 Have your parents ever drank or used drugs so much or so regularly it caused problems for the family?	1: Yes 2: No	BadExperience_R5	Continuous
R5	Dealing With Problems	paired	id003cre/dd003cre	z_id003cre	R5 Has a brother or sister ever treated you in a way that some would think of as physical abuse?	1: Yes 2: No	BadExperience_R5	Continuous
R5	Dealing With Problems	paired	id004cre/dd004cre	z_id004cre	R5 Have you ever experienced a life-threatening flood, fire, storm or some other disaster?	1: Yes 2: No	BadExperience_R5	Continuous
R5	Dealing With Problems	paired	id005cre/dd005cre	z_id005cre	R5 Have you ever served in war or combat?	1: Yes 2: No	BadExperience_R5	Continuous
R5	Dealing With Problems	paired	id006cre/dd006cre	z_id006cre	R5 Have you ever witnessed the severe injury or death of another person?	1: Yes 2: No	BadExperience_R5	Continuous
R5	Dealing With Problems	paired	id007cre/dd007cre	z_id007cre	R5 Have you ever gone deeply into debt or suffered substantial financial loss?	1: Yes 2: No	BadExperience_R5	Continuous
R5	Dealing With Problems	paired	id008cre/dd008cre	z_id008cre	R5 Have you ever had serious legal difficulties?	1: Yes 2: No	BadExperience_R5	Continuous
R5	Dealing With Problems	paired	id009cre/dd009cre	z_id009cre	R5 Have you ever been in jail or prison?	1: Yes 2: No	BadExperience_R5	Continuous
R5	Dealing With Problems	paired	id010cre/dd010cre	z_id010cre	R5 Has your spouse, or romantic partner, ever treated you in a way that some would think of as physical abuse?	1: Yes 2: No	BadExperience_R5	Continuous
R5	Dealing With Problems	paired	id011cre/dd011cre	z_id011cre	R5 Have your kids ever been divorced?	1: Yes 2: No	BadExperience_R5	Continuous
R5	Dealing With Problems	paired	id012cre/dd012cre	z_id012cre	R5 Have your children ever had a life threatening illness or accident?	1: Yes 2: No	BadExperience_R5	Continuous
R5	Dealing With Problems	paired	id013cre/dd013cre	z_id013cre	R5 Have any of your adult children ever moved back into your home?	1: Yes 2: No	BadExperience_R5	Continuous
R5	Dealing With Problems	paired	id014cre/dd014cre	z_id014cre	R5 Have you ever had increased responsibility for the care of your grandchildren?	1: Yes 2: No	BadExperience_R5	Continuous
R5	Dealing With Problems	paired	id015cre/dd015cre	z_id015cre	R5 Has an aging parent or in-law ever moved into your home?	1: Yes 2: No	BadExperience_R5	Continuous
R5	Dealing With Problems	paired	id016cre/dd016cre	z_id016cre	R5 Have you ever placed your aging spouse, in-law or parent into a nursing home?	1: Yes 2: No	BadExperience_R5	Continuous
R5	Dealing With Problems	paired	id017cre/dd017cre	z_id017cre	R5 Have you ever seriously thought about taking your own life?	1: Yes 2: No	BadExperience_R5	Continuous
R5	Social Relationships	paired	iv208rer/dv208rer	z_iv208rer	R5 Up-until you were 18, to what extent did your father insult or swear at you?	1: Not At All 2: A Little 3: Some 4: A Lot	Childhood_ELS_R5	Continuous
R5	Social Relationships	paired	iv209rer/dv209rer	z_iv209rer	R5 Up-until you were 18, to what extent did your father slap, shove or throw things at you?	1: Not At All 2: A Little 3: Some 4: A Lot	Childhood_ELS_R5	Continuous
R5	Social Relationships	paired	iv210rer/dv210rer	z_iv210rer	R5 Up-until you were 18, to what extent did your father treat you in a way that you would now consider physical abuse?	1: Not At All 2: A Little 3: Some 4: A Lot	Childhood_ELS_R5	Continuous
R5	Social Relationships	paired	iv211rer/dv211rer	z_iv211rer	R5 Up-until you were 18, to what extent did your mother insult or swear at you?	1: Not At All 2: A Little 3: Some 4: A Lot	Childhood_ELS_R5	Continuous
R5	Social Relationships	paired	iv212rer/dv212rer	z_iv212rer	R5 Up-until you were 18, to what extent did your mother slap, shove or throw things at you?	1: Not At All 2: A Little 3: Some 4: A Lot	Childhood_ELS_R5	Continuous
R5	Social Relationships	paired	iv213rer/dv213rer	z_iv213rer	R5 Up-until you were 18, to what extent did your mother treat you in a way that you would now consider physical abuse?	1: Not At All 2: A Little 3: Some 4: A Lot	Childhood_ELS_R5	Continuous
R5	Social Relationships	paired	iv214rer/dv214rer	z_iv214rer	R5 Up-until you were 18, to what extent did your father have oral, anal or vaginal sex with you against your wishes?	1: Not At All 2: A Little 3: Some 4: A Lot	Childhood_ELS_R5	Continuous
R5	Social Relationships	paired	iv215rer/dv215rer	z_iv215rer	R5 Up-until you were 18, to what extent did your father use physical violence during an unwanted sexual act with you?	1: Not At All 2: A Little 3: Some 4: A Lot	Childhood_ELS_R5	Continuous
R5	Social Relationships	paired	iv216rer/dv216rer	z_iv216rer	R5 Up-until you were 18, to what extent did your father treat you in a way that you would now consider sexual abuse?	1: Not At All 2: A Little 3: Some 4: A Lot	Childhood_ELS_R5	Continuous
R5	Social Relationships	paired	iv217rer/dv217rer	z_iv217rer	R5 Up-until you were 18, to what extent did any other person have oral, anal or vaginal sex with you against your wishes?	1: Not At All 2: A Little 3: Some 4: A Lot	Childhood_ELS_R5	Continuous
R5	Social Relationships	paired	iv218rer/dv218rer	z_iv218rer	R5 Up-until you were 18, to what extent did any other person use physical violence during an unwanted sexual act with you?	1: Not At All 2: A Little 3: Some 4: A Lot	Childhood_ELS_R5	Continuous
R5	Social Relationships	paired	iv219rer/dv219rer	z_iv219rer	R5 Up-until you were 18, to what extent did any other person treat you in a way that you would now consider sexual abuse?	1: Not At All 2: A Little 3: Some 4: A Lot	Childhood_ELS_R5	Continuous

## Sheet: Supplementary Table 2
Supplementary Table 2. Leaderboard of models and their metrics derived from the training dataframe in H2O AutoML
GBM, gradient boosting machine; GLM, generalized linear model; DRF, distributed random forest; XGBoost, extreme gradient boosting; RMSE, root mean squared error; MSE, mean squared error; MAE mean absolute error
Model ID	RMSE	MSE	MAE
GBM_1_AutoML_3_20260102_102315	0.883941	0.781352	0.626053
GLM_1_AutoML_3_20260102_102315	0.88983	0.791798	0.625878
GBM_2_AutoML_3_20260102_102315	0.891427	0.794642	0.630244
GBM_3_AutoML_3_20260102_102315	0.892603	0.796741	0.633924
DRF_1_AutoML_3_20260102_102315	0.895541	0.801994	0.639094
GBM_4_AutoML_3_20260102_102315	0.899665	0.809397	0.63799
XGBoost_3_AutoML_3_20260102_102315	0.928948	0.862944	0.661012
XGBoost_2_AutoML_3_20260102_102315	0.984635	0.969506	0.714452
XGBoost_1_AutoML_3_20260102_102315	1.01379	1.02776	0.740249

## Sheet: Supplementary Table 3
Supplementary Table 3. Model parameters of gradient boosting machine from H2O AutoML.
Parameter	Value
model_id	{'__meta': {'schema_version': 3, 'schema_name': 'ModelKeyV3', 'schema_type': 'Key<Model>'}, 'name': 'GBM_1_AutoML_3_20260102_102315', 'type': 'Key<Model>', 'URL': '/3/Models/GBM_1_AutoML_3_20260102_102315'}
training_frame	{'__meta': {'schema_version': 3, 'schema_name': 'FrameKeyV3', 'schema_type': 'Key<Frame>'}, 'name': 'AutoML_3_20260102_102315_training_Key_Frame__upload_b3b107bbccd0a850b935b80ddab84db3.hex', 'type': 'Key<Frame>', 'URL': '/3/Frames/AutoML_3_20260102_102315_training_Key_Frame__upload_b3b107bbccd0a850b935b80ddab84db3.hex'}
validation_frame
nfolds	5
keep_cross_validation_models	FALSE
keep_cross_validation_predictions	TRUE
keep_cross_validation_fold_assignment	FALSE
score_each_iteration	FALSE
score_tree_interval	5
fold_assignment	Modulo
fold_column
response_column	{'__meta': {'schema_version': 3, 'schema_name': 'ColSpecifierV3', 'schema_type': 'VecSpecifier'}, 'column_name': 'Depression_score_R6', 'is_member_of_frames': None}
ignored_columns	['Health_mother_asthma_R5', 'Health_family_cancer_R5', 'Discomfort_shortbreath_R5', 'Illness_kidney_R6', 'OtherLoan_own_R6', 'Hobby_magazine_R6', 'Family_father_close_R6', 'Social_senior_R6', 'Household_Income5_R5', 'Depression_score_R4', 'Health_father_heartold_R6', 'Health_brother_strokeold_R5', 'Religion_attendance2_R6', 'Social_neighborhood_R6', 'Social_community_R6', 'Household_Savings3_R4',…
ignore_const_cols	TRUE
offset_column
weights_column
balance_classes	FALSE
class_sampling_factors
max_after_balance_size	5
max_confusion_matrix_size	20
ntrees	38
max_depth	15
min_rows	100
nbins	20
nbins_top_level	1024
nbins_cats	1024
r2_stopping	1.7976931348623157e+308
stopping_rounds	0
stopping_metric	RMSE
stopping_tolerance	0.0117818
max_runtime_secs	0
seed	2025
build_tree_one_node	FALSE
learn_rate	0.1
learn_rate_annealing	1
distribution	gaussian
quantile_alpha	0.5
tweedie_power	1.5
huber_alpha	0.9
checkpoint
sample_rate	0.8
sample_rate_per_class
col_sample_rate	0.8
col_sample_rate_change_per_level	1
col_sample_rate_per_tree	0.8
min_split_improvement	1e-05
histogram_type	UniformAdaptive
max_abs_leafnode_pred	1.7976931348623157e+308
pred_noise_bandwidth	0
categorical_encoding	Enum
calibrate_model	FALSE
calibration_frame
calibration_method	PlattScaling
custom_metric_func
custom_distribution_func
export_checkpoints_dir
in_training_checkpoints_dir
in_training_checkpoints_tree_interval	1
monotone_constraints
check_constant_response	TRUE
gainslift_bins	-1
auc_type	AUTO
interaction_constraints
auto_rebalance	TRUE

## Sheet: Supplementary Table 4
Supplementary Table 4. Mean absolute SHAP values derived from gradient boosting machine (sorted by descending order).
Feature	Mean Absolute SHAP
EnvironmentalMastery_R5	0.128948
Neuroticism_R5	0.0524593
PurposeinLife_R5	0.0477737
SelfAcceptance_R4_z	0.0441754
EnvironmentalMastery_R4_z	0.0385609
SelfAcceptance_R5	0.0364275
Neuroticism_R4_z	0.0330954
PositiveRelationship_R5	0.0260085
Optimism_R5	0.0205702
Depression_GPS	0.016128
Household_RetirePlan_value1_R5	0.01607
Smoke_freq_R5	0.0153127
Home_equity_R4	0.0146574
HealthCare_difficulty_R5	0.0141478
age_R3	0.0140361
IQ	0.0136265
BMI_R5	0.01242
BadExperience_R5	0.0120294
Hobby_TV_R5	0.0117309
Support_money_R4	0.0116734
PsychWellbeing_R4	0.0116576
Household_RetirePlan_own1_R5	0.0112555
Family_num_ill_R5	0.011188
age_R5	0.011129
Work_hectic_R5	0.0110706
BMI_R4	0.0107563
Hobby_phone_R5	0.0105085
HealthInsurance_num_private_R5	0.0093966
PositiveRelationship_R4_z	0.00899077
EV2	0.00886946
Autonomy_R4_z	0.00867922
age_R4	0.0086697
Critical_social_R5	0.00828238
Childhood_ELS_R5	0.0081092
Work_creative_R5	0.00794202
Insomnia_GPS	0.00761709
Work_satisfied_R4	0.00739817
Burden_social_R5	0.00718526
FutureChance_reducetime_R4	0.00704757
Work_coworker_talk_R5	0.0070319
Support_money_R5	0.006776
Work_physical_R4	0.00675325
PurposeinLife_R4_z	0.00662096
Extraversion_R5	0.00643031
Home_equity1_R5	0.00580385
Work_hours_R4	0.00553632
Home_loan1_R5	0.00541348
Work_same_hours_R4	0.00540871
Agreeableness_R4_z	0.00526459
CP_GPS	0.00523036
Work_hands_R5	0.00523011
Work_paidvacation_days_R4	0.00508164
Vehicle_equity_R4	0.00500701
Social_community_R3	0.00495549
Work_toomuch_R5	0.0049335
Childhood_head_classwork_R3	0.0047559
Household_Assets1_R5	0.0046102
MDD_GPS	0.00455154
Work_safe_R5	0.0044487
Household_Investments_own1_R5	0.00443959
Sibling_close_R5	0.00442353
Snoring_GPS	0.00441537
Work_stand_R5	0.00431202
HealthInsurance_num_public_R5	0.00425646
Work_boss_help_R5	0.004256
Religion_attendance_R5	0.00406374
EV6	0.00403652
Support_sick_R4	0.00394083
Social_hobby_R4	0.00390627
College_years_R4	0.00388278
Doctor_years_R5	0.00386806
Social_friends_R5	0.00384755
PersonalGrowth_R4_z	0.00374387
ASP_GPS	0.00374191
Work_hourlywage_R4	0.00372464
HealthCare_convenience_R5	0.00369926
Health_cost_R5	0.00368432
Occup_Income_Score_R5	0.00367967
NTPrestige1989_R5	0.00366731
IQ_GPS	0.00364541
Marital_age_R4	0.00348052
Social_business_R3	0.00342892
Sibling_close_R4	0.0034274
EV7	0.00336648
Cannabis_GPS	0.00336272
Work_decidetask_R5	0.00329205
Work_deciderate_R5	0.00323062
Work_coworker_help_R5	0.00321358
Vehicle_value1_R4	0.00319008
Work_repetition_R5	0.00309401
Openness_R5	0.00306479
College_years_R3	0.00304898
Work_boss_listen_R5	0.00302205
Extraversion_R4_z	0.00301018
GenHappiness_GPS	0.00300343
PTSD_GPS	0.00299239
Retirement_change_expect_R4	0.00294518
Social_charity_R5	0.00293033
Caregiving_give_advice_R5	0.00292881
Family_num_R4	0.00290691
Spouse_close_R4	0.00287827
Work_kneel_R5	0.00286409
Openness_R4_z	0.00283748
Risk4PC_GPS	0.00276934
Hobby_lightphysical_tog_R5	0.00274945
Work_coworker_listen_R5	0.00270843
Social_friends_R3	0.00270615
Agreeableness_R5	0.00270013
Work_easyleave_R5	0.00266663
Social_relatives_R4	0.00265594
Work_manydifferent_R5	0.00264238
Autonomy_R5	0.00263412
Work_boss_talk_R5	0.00258257
Smoker_GPS	0.0025782
Work_read_R4	0.00256955
Work_same_hours_R5	0.00254635
Conscientiousness_R4_z	0.00253657
EV5	0.00249676
Work_learnnew_R5	0.00244042
Work_decideinterrupt_R5	0.00239871
Work_fast_R5	0.00237477
Pension_ira_R4	0.00235134
Smoke_ever_R4	0.00234835
AD_GPS	0.00231847
Home_loan1_R4	0.00231831
Social_church1_R5	0.00229349
Caregiving_give_weeks_R4	0.00225237
Childhood_head_occup_major_R3	0.00224671
Work_nodemand_R5	0.00223812
Hobby_bar_R5	0.00223288
Childhood_head_edu_R3	0.00223257
Support_problem_R4	0.00223141
Children_num_R4	0.00221664
Sports_light_R4	0.00220585
Childhood_head_occup_census_R3	0.00220244
Neuroticism_GPS	0.00217909
Drink_GPS	0.00216546
Work_weeks_R3	0.00215567
Social_church1_R4	0.002146
Social_relatives_R5	0.00213786
LaborForce_weeks_R3	0.00212388
Hobby_read_R5	0.00211571
Work_people_R4	0.00211322
OCD_GPS	0.00211103
BIP_GPS	0.00210484
Vehicle_value1_R5	0.00210466
Support_sick_R5	0.00210254
HealthInsurance_type_R5	0.00208306
OccupCode1990_Census_R5	0.00208206
Work_learnnew_R4	0.00206314
Personal_Wage_R3	0.00205767
Personal_Income_R3	0.0020407
Social_church2_R5	0.00203348
Work_awkward_R5	0.00198839
HealthCare_internet_R5	0.00194119
Sp_SocialSecurity_value1_R5	0.00193971
Work_concentration2_R5	0.00193896
Work_hands2_R5	0.00193489
Conscientiousness_R5	0.00190512
Work_enoughtime_R5	0.00190166
Anxiety_GPS	0.0018966
PersonalGrowth_R5	0.00188716
Work_hands_R4	0.00186931
Social_involvement_R5	0.00185419
SocialSecurity_value1_R5	0.00182817
ASD_GPS	0.00182441
ED_GPS	0.00175182
HealthInsurance_viaSpouse_R4	0.00174464
FutureChance_losejob_R4	0.00172921
GenHappiness_meaningful_GPS	0.00172652
IndustryCode1990_Census_R5	0.00172181
Occup_Edu_Score_R5	0.00172127
Marital_history_R5	0.00171289
Work_people_R5	0.00168909
Childhood_head_ind_census_R3	0.00165128
Spouse_close_R5	0.00164407
Household_Income_R3	0.00164368
Social_fraternal_R3	0.00162272
Work_firmsize_R4	0.00161239
Social_num2_R3	0.00161099
Home_value1_R4	0.00161036
Work_sayalot_R5	0.00159546
LaborForce_MajorActivity_R3	0.00159432
Hobby_movie_R5	0.00159193
Work_dirty_R4	0.00157905
Business_own1_R4	0.00156396
RetirementPlan_own_R5	0.00153785
sex	0.00153717
Pension_value1_R5	0.00151653
Work_hard_R5	0.0015082
Social_church_R3	0.00147247
Social_pta_R3	0.00146472
Social_veteran_R5	0.00144056
Work_heavy_R5	0.00144017
Religion_attendance_R4	0.00141697
Social_sport_R4	0.00141347
Children_num_R5	0.00139668
Hobby_music_R5	0.00139139
Alcohol_live_R5	0.00137267
Social_profesional_R4	0.00135624
Work_noexcessive_R5	0.00132357
IndustryCode1990_Major_R5	0.0013188
Childhood_head_DuncanSEI_R3	0.00130579
Work_interrupt_R5	0.00130143
Childhood_head_occup_income_R3	0.00129388
EA_GPS	0.00128047
Social_neighborhood_R4	0.00125741
Pension_R5	0.00125703
EV10	0.00125638
Household_Investments1_R4	0.00122017
Social_friends_R4	0.00121115
Work_dangerous_freq_R4	0.00118887
Social_community_R5	0.00118464
Spouse_Wage1_R4	0.0011681
Work_decision_R5	0.00115276
Religion_attendance_R3	0.00113752
FutureChance_work_R4	0.00113369
Work_littlefreedom_R5	0.00110353
Work_boss_rely_R5	0.00109504
EV9	0.00108846
Work_timepressure_R4	0.00105742
Household_Cash_value1_R5	0.00103857
OccupCode1990_Major_R5	0.00103475
Hobby_heavyphysical_alone_R5	0.00103439
Mattering_R5	0.00102767
Marital_history_R4	0.00102135
EV8	0.00101912
Childhood_head_indust_major_R3	0.0010184
Family_mother_R4	0.00100782
Work_read_R5	0.000993333
Hobby_game_R5	0.000986703
Caregiving_give_advice_R4	0.000985066
College_attendance_R4	0.000982365
Cross_GPS	0.000978032
Work_wait_R5	0.000962263
Work_concentration_R4	0.000961123
Pension_ira_R5	0.000958911
Sports_heavy_R4	0.00093729
Marital_status_R5	0.000922192
Spouse_Insurance_reward1_R5	0.000911828
Childhood_head_occup_edu_R3	0.000898037
SCZ_GPS	0.000869569
Smoke_childhood_R5	0.000858428
Smoke_regularly_ever_R5	0.000834024
Social_num_R3	0.000825226
EV1	0.000823479
Pension_own1_R5	0.00081695
HealthInsurance_num_R5	0.000815673
Alcohol_childhood_R5	0.000814854
Social_union_R4	0.000807663
Work_bend_R5	0.00079809
Household_Savings1_R4	0.000776541
Hobby_museum_R5	0.000758377
Social_profesional_R3	0.000755682
Vehicle_equity1_R5	0.000755646
Sibling_R5	0.000755231
Work_decideorder_R5	0.000752622
Personal_Insur_own1_R5	0.000750289
Social_nationality_R5	0.000745121
Pension_annuity_R5	0.000740486
Work_paidvacation_R4	0.000718937
Work_highskill_R5	0.000695656
Childhood_head_SiePrestige_R3	0.000678046
Sports_heavy_hours_R5	0.000674159
Computer_household_R5	0.000672868
Work_coworker_rely_R5	0.000669293
Social_union_R3	0.000661504
Home_value1_R5	0.00064648
RiskTOL_GPS	0.000644581
Smoke_now_R5	0.000638584
Hobby_lightphysical_alone_R5	0.000634001
Social_charity_R4	0.000631364
Family_num_R5	0.000616566
Hobby_craft_R5	0.000604116
Family_mother_R5	0.000601787
Family_mother_close_R5	0.000574063
Sibling_contact_R5	0.000565155
Hobby_repair_R5	0.000560878
Retirement_R5	0.000559971
RealEstate_own1_R4	0.000547059
Training_num_R3	0.000535989
Social_business_R4	0.000530706
EV3	0.000516885
Work_pension_R5	0.000516419
ClassWorker_R5	0.000478605
Social_sport_R3	0.000476762
Support_social_R4	0.00047381
Listen_social_R5	0.00045913
Household_Assets_R4	0.000447382
EV4	0.000435377
AlcoholDEP_GPS	0.000362045
Social_profesional_R5	0.000342658
College_attendance_R3	0.00022393
Support_problem_R5	0.000170057
Hobby_letters_R5	0
Hobby_art_R5	0
Childhood_head2_R3	0
Family_father_close_R5	0
Caregiving_get_weeks_R4	0
Caregiving_get_health_R4	0
Caregiving_give_hours_R4	0
Caregiving_give_health_R4	0
Social_other2_R3	0
Family_father_contact_R4	0
Family_father_R4	0
Sibling_R4	0
Spouse_Caregiving_get_hours_R4	0
Spouse_Caregiving_get_weeks_R4	0
Sp_Caregiving_get_health_R4	0
Caregiving_get_hours_R4	0
Social_fraternal_R4	0
Family_father_close_R4	0
Marital_status_R4	0
Sibling_contact_R4	0
Support_family_R4	0
Work_dangerous_level_R4	0
Social_veteran_R4	0
Work_dangerous_R4	0
Social_neighborhood_R3	0
Social_countryclub_R3	0
Social_youth_R3	0
Social_nationality_R3	0
Work_chanceskill_R5	0
Education_years_R5	0
Marital_status_R3	0
College_attendance_R5	0
Marital_history_R3	0
Employment_ever_R5	0
Work_insurance_R5	0
Social_charity_R3	0
Social_other1_R3	0
Social_veteran_R3	0
Social_political_R3	0
Home_own1_R4	0
Alcohol_childhood_R4	0
Alcohol_live_R4	0
Hobby_heavyphysical_tog_R5	0
Hobby_fish_R5	0
Hobby_puzzle_R5	0
HealthInsurance_employer_R4	0
Social_hobby_R5	0
Social_countryclub_R4	0
Social_youth_R4	0
Work_num_R4	0
LaborForce_status_R3	0
Pension_other_R4	0
Spouse_Pension_employer_R4	0
RealEstate_equity1_R5	0
Business_equity1_R5	0
Pension_other_R5	0
Personal_Profit_R3	0
RealEstate_value1_R5	0
Spouse_Retirement_R4	0
Social_community_R4	0
Social_pta_R4	0
Social_political_R4	0
Social_nationality_R4	0
Family_father_R5	0
Support_social_R5	0
Love_social_R5	0
Support_family_R5	0
Household_Stocks_value1_R5	0
Household_Stocks_own1_R5	0
Household_CDs_value1_R5	0
Household_CDs_own1_R5	0
Household_Cash_own1_R5	0
Pension_employer_R4	0
Vehicle_loan1_R4	0
Personal_Insurance_reward1_R5	0
Social_sport_R5	0
Social_countryclub_R5	0
Social_union_R5	0
Social_youth_R5	0
Social_fraternal_R5	0
Social_involvement_R3	0
Social_pta_R5	0
Social_business_R5	0
Pension_employer_R5	0
Pension_401k_R5	0
Social_political_R5	0
Social_neighborhood_R5	0
RealEstate_own1_R5	0
Smoke_household_R5	0
Business_value1_R5	0
Business_loan1_R5	0
Home_own1_R5	0
OtherLoan_value1_R5	0
OtherLoan_own1_R5	0
Household_OthAssets_own1_R5	0
Vehicle_loan1_R5	0
Household_OthAssets_value1_R5	0
RealEstate_loan1_R5	0
Vehicle_own1_R5	0
Subsidy_value1_R5	0
Subsidy_own1_R5	0
HealthInsurance_other_R4	0
HealthInsurance_private_R4	0
Doctor_office_R5	0
Doctor_R5	0
Computer_within5_R5	0
Smoke_ever_R5	0
Sports_light_hours_R5	0
Smoke_work_R5	0
Internet_household_R5	0
Business_own1_R5	0
Household_Income1_R5	0
Spouse_Subsidy_value1_R5	0
Household_Investments1_R5	0
Spouse_Subsidy_own1_R5	0
Personal_Profit_own1_R4	0
Personal_Wage1_R4	0
OtherLoan_own1_R4	0
OtherLoan_value1_R4	0
Sp_SocialSecurity_own1_R5	0
Spouse_Profit_own1_R4	0
Spouse_Profit_value1_R4	0
SocialSecurity_own1_R5	0
Personal_Income1_R5	0
Business_loan1_R4	0
Vehicle_own1_R4	0
RealEstate_loan1_R4	0
Personal_Profit_value1_R4	0
RealEstate_value1_R4	0
Business_value1_R4	0
Childhood_bothparents_R3	0

## Sheet: Supplementary Table 5
Supplementary Table 5. Feature importance derived from the gradient boosting machine.
Feature	Relative Importance	Scaled Importance	Percentage
EnvironmentalMastery_R5	3537.82	1	0.212352
PurposeinLife_R5	826.218	0.233539	0.0495924
SelfAcceptance_R5	825.753	0.233408	0.0495645
SelfAcceptance_R4_z	634.201	0.179264	0.0380669
Neuroticism_R5	618.496	0.174824	0.0371242
Neuroticism_R4_z	505.896	0.142997	0.0303656
PositiveRelationship_R5	475.583	0.134428	0.0285461
EnvironmentalMastery_R4_z	455.295	0.128694	0.0273283
Optimism_R5	327.008	0.0924323	0.0196281
Household_RetirePlan_value1_R5	170.817	0.0482833	0.010253
Hobby_TV_R5	151.077	0.0427035	0.00906815
PsychWellbeing_R4	134.888	0.0381276	0.00809645
Critical_social_R5	134.868	0.0381217	0.00809521
IQ	130.523	0.0368936	0.00783441
PositiveRelationship_R4_z	128.566	0.0363404	0.00771695
Support_money_R4	126.814	0.0358452	0.00761178
Hobby_phone_R5	116.755	0.033002	0.00700803
BMI_R5	111.645	0.0315577	0.00670133
HealthCare_difficulty_R5	105.966	0.0299524	0.00636045
Family_num_ill_R5	105.662	0.0298663	0.00634216
Depression_GPS	104.791	0.0296201	0.00628989
Childhood_ELS_R5	102.896	0.0290847	0.00617618
Smoke_freq_R5	102.305	0.0289177	0.00614072
Work_hectic_R5	101.497	0.0286891	0.00609218
Home_equity_R4	99.9578	0.0282541	0.00599981
CP_GPS	90.4445	0.0255651	0.00542878
Household_RetirePlan_own1_R5	89.3415	0.0252533	0.00536258
Work_creative_R5	87.2206	0.0246538	0.00523528
age_R5	87.0697	0.0246112	0.00522622
PurposeinLife_R4_z	80.0146	0.022617	0.00480275
EV2	79.8886	0.0225813	0.00479518
BadExperience_R5	79.5851	0.0224955	0.00477696
age_R4	76.4884	0.0216202	0.00459109
Autonomy_R4_z	74.9712	0.0211914	0.00450002
FutureChance_reducetime_R4	73.455	0.0207628	0.00440902
Insomnia_GPS	73.1239	0.0206692	0.00438914
Work_physical_R4	68.4128	0.0193376	0.00410636
MDD_GPS	65.3423	0.0184697	0.00392206
Support_sick_R4	63.9027	0.0180628	0.00383566
age_R3	63.2143	0.0178682	0.00379434
Occup_Income_Score_R5	56.4587	0.0159586	0.00338884
Household_Assets1_R5	55.785	0.0157682	0.0033484
HealthInsurance_num_private_R5	54.3058	0.0153501	0.00325962
Religion_attendance_R5	54.1054	0.0152934	0.00324759
Work_hourlywage_R4	53.5881	0.0151472	0.00321654
Snoring_GPS	53.5583	0.0151388	0.00321475
Work_boss_help_R5	53.0863	0.0150054	0.00318642
Marital_age_R4	52.7664	0.014915	0.00316721
Work_stand_R5	52.4872	0.014836	0.00315046
Cannabis_GPS	52.1904	0.0147522	0.00313265
Work_coworker_talk_R5	52.0419	0.0147102	0.00312373
Work_satisfied_R4	51.357	0.0145166	0.00308262
Work_repetition_R5	50.7147	0.014335	0.00304407
Childhood_head_classwork_R3	50.5637	0.0142923	0.003035
Work_safe_R5	50.2668	0.0142084	0.00301718
BMI_R4	49.6054	0.0140215	0.00297748
PTSD_GPS	48.9713	0.0138422	0.00293942
Social_friends_R5	47.8379	0.0135219	0.00287139
Support_money_R5	47.6349	0.0134645	0.00285921
Vehicle_equity_R4	47.2182	0.0133467	0.00283419
Burden_social_R5	46.581	0.0131666	0.00279595
Work_coworker_help_R5	46.5367	0.0131541	0.00279329
Work_toomuch_R5	46.4003	0.0131155	0.0027851
Work_easyleave_R5	45.4334	0.0128422	0.00272707
Home_equity1_R5	44.9486	0.0127052	0.00269797
Household_Investments_own1_R5	44.1124	0.0124688	0.00264778
Social_community_R3	43.8521	0.0123953	0.00263215
NTPrestige1989_R5	43.7751	0.0123735	0.00262753
Work_hours_R4	42.267	0.0119472	0.00253701
Risk4PC_GPS	41.4559	0.0117179	0.00248832
Social_hobby_R4	40.8671	0.0115515	0.00245298
HealthCare_convenience_R5	40.0753	0.0113277	0.00240545
Childhood_head_occup_census_R3	39.952	0.0112928	0.00239805
EV6	39.8386	0.0112608	0.00239125
Work_boss_listen_R5	39.8284	0.0112579	0.00239064
Work_paidvacation_days_R4	39.7165	0.0112263	0.00238392
ASP_GPS	39.7026	0.0112224	0.00238309
Vehicle_value1_R4	39.6412	0.011205	0.0023794
Doctor_years_R5	39.6078	0.0111956	0.00237739
Work_same_hours_R4	39.3142	0.0111126	0.00235977
HealthInsurance_num_public_R5	38.8593	0.010984	0.00233247
Childhood_head_edu_R3	38.7255	0.0109462	0.00232444
Agreeableness_R4_z	38.6089	0.0109132	0.00231743
Sibling_close_R5	38.3505	0.0108402	0.00230193
PersonalGrowth_R4_z	38.1522	0.0107841	0.00229002
EV7	38.0001	0.0107411	0.00228089
Openness_R5	37.9237	0.0107195	0.00227631
Sports_light_R4	37.0756	0.0104798	0.0022254
Household_Income_R3	36.7518	0.0103883	0.00220597
Extraversion_R4_z	36.2473	0.0102457	0.00217568
Hobby_read_R5	36.0328	0.010185	0.00216281
Extraversion_R5	35.7109	0.0100941	0.00214349
ASD_GPS	34.686	0.00980436	0.00208197
Support_sick_R5	34.5664	0.00977056	0.00207479
Work_kneel_R5	34.2819	0.00969012	0.00205771
Work_same_hours_R5	33.902	0.00958276	0.00203492
Caregiving_give_advice_R5	33.808	0.00955619	0.00202927
Work_learnnew_R5	33.5636	0.0094871	0.0020146
Work_hands_R5	33.4639	0.00945892	0.00200862
Smoker_GPS	33.3448	0.00942525	0.00200147
College_years_R4	33.1001	0.0093561	0.00198678
Social_church1_R4	32.8371	0.00928175	0.00197099
Social_relatives_R4	32.1006	0.00907357	0.00192679
GenHappiness_GPS	31.9708	0.00903686	0.00191899
Work_decidetask_R5	31.3513	0.00886176	0.00188181
Neuroticism_GPS	30.608	0.00865167	0.0018372
Sibling_close_R4	30.3083	0.00856696	0.00181921
Work_firmsize_R4	30.1531	0.00852309	0.00180989
Family_num_R4	29.9311	0.00846033	0.00179656
Work_fast_R5	29.6014	0.00836715	0.00177678
Autonomy_R5	29.5861	0.00836282	0.00177586
Occup_Edu_Score_R5	28.9903	0.00819439	0.00174009
Health_cost_R5	27.9076	0.00788838	0.00167511
Childhood_head_occup_major_R3	27.8424	0.00786995	0.0016712
HealthInsurance_type_R5	27.5061	0.00777489	0.00165101
Work_deciderate_R5	27.1693	0.00767967	0.00163079
Work_hands_R4	26.6772	0.0075406	0.00160126
Pension_ira_R4	26.6709	0.0075388	0.00160088
BIP_GPS	26.4209	0.00746813	0.00158587
PersonalGrowth_R5	26.1907	0.00740308	0.00157206
LaborForce_weeks_R3	26.0019	0.00734972	0.00156072
OCD_GPS	25.7711	0.00728447	0.00154687
ED_GPS	25.7586	0.00728094	0.00154612
Social_pta_R3	25.6556	0.00725181	0.00153993
IQ_GPS	25.4526	0.00719444	0.00152775
Sp_SocialSecurity_value1_R5	24.9753	0.00705953	0.0014991
Agreeableness_R5	24.9547	0.00705371	0.00149787
Household_Cash_value1_R5	24.9026	0.00703898	0.00149474
Work_heavy_R5	24.6873	0.00697812	0.00148182
AD_GPS	24.6529	0.00696838	0.00147975
OccupCode1990_Census_R5	24.5602	0.00694221	0.00147419
Work_boss_talk_R5	24.5162	0.00692976	0.00147155
Pension_value1_R5	24.2898	0.00686577	0.00145796
Smoke_ever_R4	24.217	0.00684519	0.00145359
Drink_GPS	24.212	0.00684378	0.00145329
Marital_history_R5	24.0078	0.00678605	0.00144103
Openness_R4_z	24.0059	0.00678551	0.00144091
Hobby_bar_R5	23.5629	0.0066603	0.00141433
Vehicle_value1_R5	23.119	0.00653483	0.00138768
Religion_attendance_R4	23.0591	0.00651789	0.00138408
Conscientiousness_R4_z	22.9489	0.00648674	0.00137747
Work_hard_R5	22.6675	0.00640721	0.00136058
Childhood_head_occup_income_R3	22.6662	0.00640683	0.0013605
College_years_R3	22.2185	0.00628028	0.00133363
Spouse_close_R4	21.413	0.00605261	0.00128528
Work_nodemand_R5	21.3647	0.00603896	0.00128238
Anxiety_GPS	21.3317	0.00602963	0.0012804
Childhood_head_ind_census_R3	21.198	0.00599185	0.00127238
Work_coworker_listen_R5	21.1268	0.0059717	0.0012681
Childhood_head_DuncanSEI_R3	20.7589	0.00586773	0.00124602
Work_manydifferent_R5	20.5105	0.00579751	0.00123111
Personal_Wage_R3	20.4551	0.00578185	0.00122779
Conscientiousness_R5	19.8389	0.00560767	0.0011908
Work_learnnew_R4	19.804	0.00559779	0.0011887
IndustryCode1990_Major_R5	19.6956	0.00556716	0.0011822
Social_sport_R4	19.3864	0.00547977	0.00116364
FutureChance_work_R4	19.3123	0.00545882	0.00115919
Social_friends_R3	19.0684	0.00538988	0.00114455
Personal_Income_R3	18.7838	0.00530945	0.00112747
Work_people_R4	18.7208	0.00529162	0.00112368
RetirementPlan_own_R5	18.6057	0.0052591	0.00111678
Family_mother_R4	18.2873	0.00516908	0.00109766
Social_church1_R5	17.9807	0.00508242	0.00107926
Social_business_R3	17.5574	0.00496278	0.00105385
Work_sayalot_R5	17.5527	0.00496145	0.00105357
Spouse_close_R5	17.4494	0.00493225	0.00104737
EA_GPS	17.1404	0.0048449	0.00102882
Home_value1_R4	17.0972	0.0048327	0.00102623
FutureChance_losejob_R4	16.8903	0.00477421	0.00101381
Religion_attendance_R3	16.8133	0.00475245	0.00100919
Social_church_R3	16.6629	0.00470994	0.00100016
Children_num_R5	16.5562	0.00467977	0.000993756
Home_loan1_R5	16.5158	0.00466837	0.000991335
Work_interrupt_R5	16.4398	0.00464687	0.000986771
Social_relatives_R5	16.2482	0.00459271	0.000975269
Children_num_R4	16.1031	0.00455171	0.000966562
Work_awkward_R5	16.0484	0.00453625	0.000963279
HealthInsurance_viaSpouse_R4	15.8135	0.00446985	0.000949181
Hobby_lightphysical_tog_R5	15.6021	0.00441009	0.00093649
Work_weeks_R3	15.579	0.00440357	0.000935104
Social_friends_R4	15.4102	0.00435585	0.000924973
Social_involvement_R5	15.1984	0.00429598	0.000912257
EV5	15.0556	0.00425563	0.000903689
Work_read_R4	14.9485	0.00422534	0.000897257
Business_own1_R4	14.8706	0.00420334	0.000892586
SocialSecurity_value1_R5	14.7278	0.00416296	0.000884012
Work_enoughtime_R5	14.7208	0.00416099	0.000883592
Cross_GPS	14.1211	0.00399146	0.000847594
LaborForce_MajorActivity_R3	13.9391	0.00394003	0.000836671
sex	13.8823	0.00392399	0.000833265
Work_people_R5	13.867	0.00391966	0.000832347
Work_concentration2_R5	13.8254	0.00390789	0.000829847
Support_problem_R4	13.8069	0.00390266	0.000828737
Social_community_R5	13.7668	0.00389132	0.000826328
Work_dangerous_freq_R4	13.6697	0.00386389	0.000820503
Sports_heavy_R4	13.6453	0.00385698	0.000819036
Marital_status_R5	13.5909	0.00384162	0.000815774
Social_church2_R5	13.5493	0.00382984	0.000813272
IndustryCode1990_Census_R5	13.4705	0.00380758	0.000808546
Childhood_head_indust_major_R3	13.4511	0.00380209	0.000807381
Spouse_Wage1_R4	13.437	0.0037981	0.000806533
Work_hands2_R5	13.2493	0.00374505	0.000795268
Hobby_music_R5	13.2189	0.00373646	0.000793443
Home_loan1_R4	13.2152	0.00373542	0.000793222
Social_profesional_R4	13.0526	0.00368946	0.000783463
Work_dirty_R4	12.709	0.00359232	0.000762835
GenHappiness_meaningful_GPS	12.6677	0.00358065	0.000760357
Retirement_change_expect_R4	12.6332	0.0035709	0.000758286
Work_noexcessive_R5	12.3665	0.00349552	0.000742278
Work_read_R5	12.3217	0.00348286	0.000739591
Marital_history_R4	12.0516	0.00340651	0.000723378
Support_problem_R5	11.981	0.00338656	0.000719142
Hobby_movie_R5	11.9675	0.00338273	0.000718328
Work_decideinterrupt_R5	11.6536	0.00329402	0.00069949
Social_fraternal_R3	11.1969	0.00316492	0.000672076
Spouse_Insurance_reward1_R5	11.1585	0.00315408	0.000669774
Social_neighborhood_R4	10.8694	0.00307235	0.000652418
Home_value1_R5	10.4738	0.00296053	0.000628674
Work_decision_R5	10.2912	0.00290891	0.000617713
Caregiving_give_advice_R4	10.2577	0.00289946	0.000615704
Hobby_game_R5	9.83482	0.00277991	0.000590319
Social_charity_R5	9.54101	0.00269686	0.000572684
Caregiving_give_weeks_R4	9.51332	0.00268904	0.000571021
EV1	9.18244	0.00259551	0.000551161
College_attendance_R4	9.12457	0.00257915	0.000547687
EV9	9.02617	0.00255134	0.000541781
Social_num2_R3	8.93935	0.0025268	0.00053657
Social_charity_R4	8.80091	0.00248767	0.00052826
Work_bend_R5	8.73813	0.00246992	0.000524492
Pension_R5	8.69183	0.00245684	0.000521713
EV8	8.34741	0.00235948	0.00050104
Work_highskill_R5	8.27241	0.00233828	0.000496538
Pension_own1_R5	8.13976	0.00230079	0.000488576
Hobby_heavyphysical_alone_R5	8.02903	0.00226949	0.00048193
Work_decideorder_R5	8.01065	0.00226429	0.000480826
Childhood_head_occup_edu_R3	7.87414	0.00222571	0.000472633
Work_boss_rely_R5	7.87264	0.00222528	0.000472542
Work_concentration_R4	7.66791	0.00216741	0.000460254
Work_littlefreedom_R5	7.48019	0.00211435	0.000448986
Work_wait_R5	7.32501	0.00207049	0.000439672
Household_Investments1_R4	6.98711	0.00197498	0.00041939
Retirement_R5	6.76772	0.00191297	0.000406221
Social_sport_R3	6.7507	0.00190816	0.0004052
Social_profesional_R3	6.73761	0.00190445	0.000404414
Pension_ira_R5	6.44729	0.00182239	0.000386988
Childhood_head_SiePrestige_R3	6.30179	0.00178127	0.000378255
RiskTOL_GPS	6.19671	0.00175156	0.000371947
Vehicle_equity1_R5	6.14853	0.00173795	0.000369056
Social_veteran_R5	6.10738	0.00172631	0.000366586
HealthCare_internet_R5	6.0965	0.00172324	0.000365933
Household_Savings1_R4	6.08929	0.0017212	0.0003655
Work_timepressure_R4	5.99425	0.00169434	0.000359795
Social_nationality_R5	5.87373	0.00166027	0.000352561
SCZ_GPS	5.68197	0.00160607	0.000341051
Social_union_R4	5.59346	0.00158105	0.000335738
EV10	5.51778	0.00155966	0.000331196
Social_num_R3	5.50507	0.00155606	0.000330433
Computer_household_R5	5.4758	0.00154779	0.000328676
HealthInsurance_num_R5	5.45681	0.00154242	0.000327536
Social_business_R4	5.41176	0.00152969	0.000324832
OccupCode1990_Major_R5	5.38152	0.00152114	0.000323017
Alcohol_live_R5	5.32922	0.00150636	0.000319878
Work_paidvacation_R4	5.31165	0.00150139	0.000318823
Smoke_regularly_ever_R5	5.04999	0.00142743	0.000303118
Pension_annuity_R5	4.98384	0.00140873	0.000299147
EV3	4.80377	0.00135784	0.000288339
RealEstate_own1_R4	4.73555	0.00133855	0.000284244
Personal_Insur_own1_R5	4.63715	0.00131074	0.000278338
Smoke_now_R5	4.59817	0.00129972	0.000275998
Social_union_R3	4.53213	0.00128105	0.000272034
Family_mother_R5	4.24997	0.0012013	0.000255098
Work_coworker_rely_R5	4.19301	0.0011852	0.000251678
Hobby_repair_R5	4.18382	0.0011826	0.000251127
Sports_heavy_hours_R5	4.14227	0.00117085	0.000248633
Hobby_craft_R5	4.12559	0.00116614	0.000247632
Smoke_childhood_R5	4.021	0.00113658	0.000241354
Sibling_contact_R5	3.98316	0.00112588	0.000239083
Training_num_R3	3.90354	0.00110337	0.000234303
Mattering_R5	3.86586	0.00109272	0.000232042
Hobby_lightphysical_alone_R5	3.68504	0.00104161	0.000221188
Family_mother_close_R5	3.63439	0.0010273	0.000218148
Sibling_R5	3.35406	0.000948059	0.000201322
Hobby_museum_R5	3.31148	0.000936025	0.000198766
Listen_social_R5	2.91318	0.000823439	0.000174859
Household_Assets_R4	2.85928	0.000808206	0.000171624
Family_num_R5	2.77233	0.000783626	0.000166404
ClassWorker_R5	2.73488	0.000773043	0.000164157
Work_pension_R5	2.70269	0.000763944	0.000162225
Alcohol_childhood_R5	2.49257	0.00070455	0.000149612
Support_social_R4	2.4696	0.000698059	0.000148234
AlcoholDEP_GPS	2.45504	0.000693943	0.00014736
EV4	2.2575	0.000638105	0.000135503
Social_profesional_R5	1.73329	0.000489933	0.000104038
College_attendance_R3	1.15597	0.000326746	6.93851e-05
Childhood_bothparents_R3	0	0	0
Childhood_head2_R3	0	0	0
Alcohol_childhood_R4	0	0	0
Alcohol_live_R4	0	0	0
Home_own1_R4	0	0	0
RealEstate_value1_R4	0	0	0
RealEstate_loan1_R4	0	0	0
Business_value1_R4	0	0	0
Business_loan1_R4	0	0	0
Vehicle_own1_R4	0	0	0
Vehicle_loan1_R4	0	0	0
OtherLoan_own1_R4	0	0	0
OtherLoan_value1_R4	0	0	0
Personal_Wage1_R4	0	0	0
Personal_Profit_own1_R4	0	0	0
Personal_Profit_value1_R4	0	0	0
Spouse_Profit_own1_R4	0	0	0
Spouse_Profit_value1_R4	0	0	0
SocialSecurity_own1_R5	0	0	0
Sp_SocialSecurity_own1_R5	0	0	0
Subsidy_own1_R5	0	0	0
Subsidy_value1_R5	0	0	0
Spouse_Subsidy_own1_R5	0	0	0
Spouse_Subsidy_value1_R5	0	0	0
Household_Investments1_R5	0	0	0
Personal_Income1_R5	0	0	0
Household_Income1_R5	0	0	0
Home_own1_R5	0	0	0
Business_own1_R5	0	0	0
Business_value1_R5	0	0	0
Business_loan1_R5	0	0	0
RealEstate_own1_R5	0	0	0
RealEstate_value1_R5	0	0	0
RealEstate_loan1_R5	0	0	0
Vehicle_own1_R5	0	0	0
Vehicle_loan1_R5	0	0	0
OtherLoan_own1_R5	0	0	0
OtherLoan_value1_R5	0	0	0
Household_Cash_own1_R5	0	0	0
Household_CDs_own1_R5	0	0	0
Household_CDs_value1_R5	0	0	0
Household_Stocks_own1_R5	0	0	0
Household_Stocks_value1_R5	0	0	0
Household_OthAssets_own1_R5	0	0	0
Household_OthAssets_value1_R5	0	0	0
Personal_Insurance_reward1_R5	0	0	0
Pension_employer_R4	0	0	0
Spouse_Pension_employer_R4	0	0	0
Pension_other_R4	0	0	0
Pension_employer_R5	0	0	0
Pension_401k_R5	0	0	0
Pension_other_R5	0	0	0
Personal_Profit_R3	0	0	0
Business_equity1_R5	0	0	0
RealEstate_equity1_R5	0	0	0
LaborForce_status_R3	0	0	0
Spouse_Retirement_R4	0	0	0
Work_num_R4	0	0	0
Work_dangerous_R4	0	0	0
Work_dangerous_level_R4	0	0	0
Work_insurance_R5	0	0	0
Employment_ever_R5	0	0	0
Work_chanceskill_R5	0	0	0
College_attendance_R5	0	0	0
Education_years_R5	0	0	0
Marital_status_R3	0	0	0
Marital_history_R3	0	0	0
Social_veteran_R3	0	0	0
Social_nationality_R3	0	0	0
Social_countryclub_R3	0	0	0
Social_youth_R3	0	0	0
Social_political_R3	0	0	0
Social_neighborhood_R3	0	0	0
Social_charity_R3	0	0	0
Social_other1_R3	0	0	0
Social_other2_R3	0	0	0
Caregiving_give_health_R4	0	0	0
Caregiving_give_hours_R4	0	0	0
Caregiving_get_health_R4	0	0	0
Caregiving_get_weeks_R4	0	0	0
Caregiving_get_hours_R4	0	0	0
Sp_Caregiving_get_health_R4	0	0	0
Spouse_Caregiving_get_weeks_R4	0	0	0
Spouse_Caregiving_get_hours_R4	0	0	0
Family_father_R4	0	0	0
Family_father_contact_R4	0	0	0
Family_father_close_R4	0	0	0
Marital_status_R4	0	0	0
Sibling_R4	0	0	0
Sibling_contact_R4	0	0	0
Support_family_R4	0	0	0
Social_veteran_R4	0	0	0
Social_fraternal_R4	0	0	0
Social_pta_R4	0	0	0
Social_community_R4	0	0	0
Social_nationality_R4	0	0	0
Social_countryclub_R4	0	0	0
Social_youth_R4	0	0	0
Social_political_R4	0	0	0
Family_father_R5	0	0	0
Family_father_close_R5	0	0	0
Support_family_R5	0	0	0
Support_social_R5	0	0	0
Love_social_R5	0	0	0
Social_union_R5	0	0	0
Social_fraternal_R5	0	0	0
Social_business_R5	0	0	0
Social_pta_R5	0	0	0
Social_sport_R5	0	0	0
Social_countryclub_R5	0	0	0
Social_youth_R5	0	0	0
Social_political_R5	0	0	0
Social_neighborhood_R5	0	0	0
Social_hobby_R5	0	0	0
Social_involvement_R3	0	0	0
HealthInsurance_employer_R4	0	0	0
HealthInsurance_private_R4	0	0	0
HealthInsurance_other_R4	0	0	0
Doctor_office_R5	0	0	0
Doctor_R5	0	0	0
Internet_household_R5	0	0	0
Computer_within5_R5	0	0	0
Smoke_ever_R5	0	0	0
Smoke_household_R5	0	0	0
Smoke_work_R5	0	0	0
Sports_light_hours_R5	0	0	0
Hobby_letters_R5	0	0	0
Hobby_art_R5	0	0	0
Hobby_puzzle_R5	0	0	0
Hobby_fish_R5	0	0	0
Hobby_heavyphysical_tog_R5	0	0	0

## Sheet: Supplementary Table 6
Supplementary Table 6. Performance of gradient boosting machines trained separately for each domain on the test set. MSE Mean Squared Error, RMSE Root Mean Squared Error, MAE Mean Absolute Error.
Domain	MSE	RMSE	MAE	R2
Full model	0.730359	0.85461	0.623486	0.235632
Psychological resource	0.759214	0.871329	0.637904	0.205433
Big 5 Personality	0.801626	0.895336	0.661444	0.161047
Social & community context	0.84985	0.921873	0.68317	0.110577
Work characteristics	0.874767	0.93529	0.69578	0.0844996
Economic stability	0.889617	0.943195	0.697592	0.0689588
Health behaviors	0.904605	0.951107	0.710222	0.0532726
Healthcare access & quality	0.914981	0.956547	0.7114	0.0424132
Environmental stressors	0.915469	0.956802	0.716638	0.0419026
Educational access & quality	0.915605	0.956873	0.716102	0.0417603
PGS	0.917303	0.95776	0.715185	0.0399829
Covariate	0.925482	0.96202	0.719868	0.0314232

## Sheet: Supplementary Table 7
Supplementary Table 7. Performance of generalized linear models trained separately for each domain on the test set. MSE Mean Squared Error, RMSE Root Mean Squared Error, MAE Mean Absolute Error.
Domain	MSE	RMSE	MAE	R2	Adjusted R2
Psychological resource	0.744734	0.86298	0.634546	0.220588	0.206481
Big 5 Personality	0.801292	0.895149	0.662458	0.161396	0.148625
Social & community context	0.84463	0.919038	0.680754	0.11604	0.0455142
Work characteristics	0.869458	0.932447	0.69018	0.0900566	0.0382278
Healthcare access & quality	0.903496	0.950524	0.70645	0.0544337	0.0373194
Educational access & quality	0.914175	0.956125	0.714452	0.0432571	0.0297818
Health behaviors	0.90322	0.950379	0.711058	0.0547221	0.0282694
Environmental stressors	0.919553	0.958933	0.7161	0.0376287	0.0246237
Covariate	0.925045	0.961792	0.718265	0.0318812	0.0226507
PGS	0.915959	0.957058	0.714064	0.0413895	0.0179289
Full model	0.717245	0.846903	0.616721	0.249357	0.0166249
Economic stability	0.900124	0.948748	0.705197	0.0579627	-0.00752658

## Sheet: Supplementary Table 8
Supplementary Table 8. Associations of individual variables with late-life depressive symptoms and their incremental explanatory value (ΔR²). Each variable was analyzed in a separate linear regression model with late-life depressive symptoms (R6) as the outcome. Models were adjusted for sex, the first ten genetic principal components, and age at the corresponding wave of the predictor (except for…
	Variable	coef	p_value	std_err	ΔR²	Domain
	EnvironmentalMastery_R5	-0.380791	0	0.00973382	0.144614	Psychological resource
	SelfAcceptance_R5	-0.356132	3.51553e-268	0.00983418	0.126556	Psychological resource
	PurposeinLife_R5	-0.329057	5.47419e-226	0.00996067	0.107617	Psychological resource
	PositiveRelationship_R5	-0.319377	5.83214e-208	0.0101058	0.0994008	Psychological resource
	SelfAcceptance_R4_z	-0.314858	9.99011e-207	0.00999437	0.0988351	Psychological resource
	EnvironmentalMastery_R4_z	-0.313737	1.67883e-203	0.0100424	0.0973562	Psychological resource
	Optimism_R5	-0.312111	1.94914e-202	0.0100183	0.096868	Psychological resource
	Neuroticism_R5	0.305911	5.51813e-193	0.0100718	0.0925178	Big 5 Personality
	PersonalGrowth_R5	-0.272099	9.38247e-151	0.0102071	0.0728259	Psychological resource
	Neuroticism_R4_z	0.263481	1.30858e-140	0.0102526	0.0680325	Big 5 Personality
	PsychWellbeing_R4	-0.261021	1.60413e-140	0.0101602	0.0679906	Psychological resource
	PositiveRelationship_R4_z	-0.263016	2.08434e-137	0.0103591	0.0665145	Psychological resource
	PurposeinLife_R4_z	-0.255421	2.09758e-134	0.0101773	0.0650889	Psychological resource
	PersonalGrowth_R4_z	-0.211846	4.1681e-91	0.0103463	0.044294	Psychological resource
	Conscientiousness_R5	-0.194962	6.16e-78	0.0103308	0.0378815	Big 5 Personality
	Agreeableness_R5	-0.186464	6.47273e-68	0.0106173	0.0329748	Big 5 Personality
	Extraversion_R5	-0.175658	3.21754e-63	0.0103839	0.0306675	Big 5 Personality
	Autonomy_R5	-0.174259	9.04105e-62	0.0104269	0.0299548	Psychological resource
	Mattering_R5	-0.167953	4.69533e-58	0.0103812	0.0281247	Psychological resource
	Love_social_R5	-0.170653	4.68372e-56	0.0107434	0.0271389	Social & community context
	Autonomy_R4_z	-0.154993	2.23856e-49	0.0104289	0.0238384	Psychological resource
	Work_repetition_R5	0.150768	4.75651e-46	0.0105233	0.0221911	Work characteristics
	Conscientiousness_R4_z	-0.143985	6.16684e-43	0.010427	0.0206477	Big 5 Personality
	Work_littlefreedom_R5	0.145007	6.35983e-43	0.0105027	0.0206412	Work characteristics
	Critical_social_R5	0.143757	1.52223e-42	0.0104609	0.0204532	Social & community context
	Agreeableness_R4_z	-0.145028	3.51954e-42	0.0106013	0.0202724	Big 5 Personality
	Openness_R4_z	-0.138485	2.27806e-39	0.0104981	0.0188768	Big 5 Personality
	Extraversion_R4_z	-0.130219	4.46214e-35	0.010493	0.0167432	Big 5 Personality
	Work_creative_R5	-0.130219	2.02951e-34	0.0105988	0.016416	Work characteristics
	Listen_social_R5	-0.133331	2.49633e-34	0.0108673	0.0163713	Social & community context
	Support_money_R4	-0.127521	9.81703e-34	0.0104905	0.0160752	Social & community context
	Work_same_hours_R5	0.1266	2.89872e-33	0.0104927	0.0158413	Work characteristics
	Work_highskill_R5	-0.127522	5.30984e-33	0.0106137	0.0157105	Work characteristics
	Openness_R5	-0.123851	5.50341e-32	0.0104809	0.0152049	Big 5 Personality
	Household_RetirePlan_own1_R5	-0.28381	4.30985e-31	0.0243824	0.0147597	Economic stability
	Work_hands2_R5	0.121239	8.38582e-31	0.0104677	0.0146158	Work characteristics
	HealthCare_convenience_R5	-0.120041	2.91883e-30	0.0104627	0.0143459	Healthcare access & quality
	Social_profesional_R4	-0.119992	5.43496e-30	0.0105085	0.0142114	Social & community context
	Occup_Edu_Score_R5	-0.119641	1.01954e-29	0.010529	0.0140753	Educational access & quality
	IQ	-0.118988	1.46978e-29	0.0105016	0.0139955	Covariate
	Work_sayalot_R5	-0.119434	4.83229e-29	0.0106407	0.0137386	Work characteristics
	FutureChance_work_R4	-0.117573	1.04744e-28	0.0105402	0.0135711	Work characteristics
	Work_chanceskill_R5	-0.11597	5.34865e-28	0.0105363	0.0132183	Work characteristics
	Work_satisfied_R4	-0.114786	9.32519e-28	0.0104771	0.0130979	Work characteristics
	Work_decision_R5	-0.115665	1.54465e-27	0.0106022	0.0129887	Work characteristics
	Work_same_hours_R4	0.113907	1.86772e-27	0.0104579	0.0129475	Work characteristics
	Support_family_R5	0.346834	1.23355e-26	0.0323646	0.0125389	Social & community context
	Hobby_TV_R5	0.112677	1.31938e-26	0.0105206	0.0125243	Health behaviors
	Education_years_R5	-0.114725	1.32652e-26	0.0107123	0.0125232	Educational access & quality
	Support_problem_R5	-0.112518	1.91473e-26	0.0105401	0.0124437	Social & community context
	Household_Cash_own1_R5	0.350268	2.74905e-26	0.0329165	0.0123654	Economic stability
	Occup_Income_Score_R5	-0.117819	3.29602e-26	0.0110899	0.0123261	Economic stability
	Family_num_ill_R5	0.11089	4.54922e-26	0.0104677	0.0122563	Social & community context
	NTPrestige1989_R5	-0.11156	4.60523e-26	0.0105322	0.0122537	Work characteristics
	BMI_R5	0.109594	2.19396e-25	0.0104941	0.0119156	Covariate
	Home_equity1_R5	-0.107997	1.45856e-24	0.0105261	0.0115054	Economic stability
	OccupCode1990_Census_R5	0.000467264	2.40626e-24	4.57614e-05	0.011397	Work characteristics
	Home_equity_R4	-0.107712	3.05784e-24	0.0105731	0.011345	Economic stability
	College_years_R4	-0.108944	3.5183e-24	0.0107085	0.0113146	Educational access & quality
	Work_safe_R5	-0.106471	3.72454e-24	0.0104712	0.0113023	Work characteristics
	OccupCode1990_Major_R5	0.0258216	7.14758e-24	0.00255571	0.0111612	Work characteristics
	College_attendance_R3	-0.218446	1.9763e-23	0.0218399	0.0109291	Educational access & quality
	HealthCare_difficulty_R5	0.389767	2.68498e-23	0.0390883	0.0108745	Healthcare access & quality
	Home_value1_R5	-0.105133	3.63939e-23	0.0105758	0.0108086	Economic stability
	College_years_R3	-0.106015	7.28759e-23	0.0107403	0.0106467	Educational access & quality
	Home_own1_R5	-0.285949	2.14498e-22	0.0292961	0.0104244	Economic stability
	Work_awkward_R5	0.102851	3.33615e-22	0.0105865	0.0103287	Work characteristics
	Support_problem_R4	-0.101231	5.85133e-22	0.0104824	0.0102069	Social & community context
	Support_money_R5	-0.101429	1.2165e-21	0.0105862	0.0100485	Social & community context
	BMI_R4	0.101238	1.36508e-21	0.0105795	0.0100234	Covariate
	College_attendance_R4	-0.20122	3.76958e-21	0.021265	0.00980342	Educational access & quality
	Work_bend_R5	0.0987456	8.50588e-21	0.0105315	0.00962721	Work characteristics
	Household_Stocks_own1_R5	-0.195462	1.66352e-20	0.0210072	0.00948192	Economic stability
	Household_Investments_own1_R5	-0.198387	4.45293e-20	0.0215678	0.00926866	Economic stability
	Burden_social_R5	0.0956054	9.28888e-20	0.0104851	0.00910941	Social & community context
	HealthInsurance_num_private_R5	-0.0966587	1.38225e-19	0.0106516	0.00902332	Healthcare access & quality
	Work_manydifferent_R5	-0.0937762	4.43007e-19	0.0104828	0.00877108	Work characteristics
	Work_toomuch_R5	0.093478	5.93146e-19	0.0104876	0.00870788	Work characteristics
	Pension_ira_R4	0.188607	8.79656e-19	0.021266	0.00862248	Economic stability
	Spouse_close_R5	-0.0928123	9.56211e-19	0.0104759	0.00860446	Social & community context
	Home_value1_R4	-0.0935929	1.09723e-18	0.0105825	0.00857462	Economic stability
	Work_coworker_rely_R5	-0.0925159	1.37852e-18	0.0104913	0.00852525	Work characteristics
	College_attendance_R5	0.186069	3.35197e-18	0.0213444	0.00833285	Educational access & quality
	Work_hands_R5	0.0906199	7.7153e-18	0.0105106	0.00815235	Work characteristics
	RealEstate_own1_R5	-0.198038	8.85295e-18	0.0230121	0.00812257	Economic stability
	Household_Assets_R4	-0.0907421	8.99227e-18	0.0105465	0.00811914	Economic stability
	Work_learnnew_R5	-0.0895339	1.67193e-17	0.0104939	0.00798493	Work characteristics
	Work_coworker_talk_R5	-0.0892887	2.03518e-17	0.0104934	0.00794236	Work characteristics
	Neuroticism_GPS	0.0885523	3.23913e-17	0.0104739	0.00784137	PGS
	Spouse_close_R4	-0.0878579	5.91277e-17	0.0104799	0.00771145	Social & community context
	Work_dirty_R4	0.0883131	8.0284e-17	0.01058	0.00764525	Work characteristics
	Social_friends_R5	-0.08768	1.33656e-16	0.0105814	0.00753499	Social & community context
	Work_decideorder_R5	-0.0866587	1.79866e-16	0.0105034	0.00747073	Work characteristics
	Social_business_R4	-0.0866652	2.18111e-16	0.0105338	0.00742896	Social & community context
	Support_family_R4	-0.268332	2.60788e-16	0.0327005	0.00739029	Social & community context
	Smoke_freq_R5	0.0850066	7.1873e-16	0.0105178	0.00717099	Health behaviors
	Support_sick_R4	-0.0838356	1.51474e-15	0.0104924	0.00700967	Social & community context
	Vehicle_equity_R4	-0.0835031	2.2279e-15	0.0105141	0.00692622	Economic stability
	Work_kneel_R5	0.0841409	2.52056e-15	0.010615	0.00689957	Work characteristics
	Computer_household_R5	-0.199831	5.02618e-15	0.0254892	0.00675031	Health behaviors
	Work_hands_R4	0.0824243	5.31273e-15	0.010523	0.00673828	Work characteristics
	Social_profesional_R5	-0.082123	7.086e-15	0.0105336	0.00667604	Social & community context
	Pension_R5	-0.209377	1.84281e-14	0.0272844	0.00646941	Economic stability
	Sports_light_R4	-0.0801963	2.38619e-14	0.0104963	0.00641352	Health behaviors
	Household_RetirePlan_value1_R5	-0.0804893	2.73987e-14	0.0105594	0.00638368	Economic stability
	Work_heavy_R5	0.0799327	4.33148e-14	0.0105691	0.0062847	Work characteristics
	Work_physical_R4	0.0788647	6.56298e-14	0.0105037	0.00619487	Work characteristics
	Work_fast_R5	0.0755413	7.06631e-13	0.0105084	0.00568165	Work characteristics
	Work_coworker_help_R5	-0.074734	1.16381e-12	0.0104966	0.00557396	Work characteristics
	Social_church2_R5	-0.075921	1.17919e-12	0.0106661	0.00557113	Social & community context
	Religion_attendance_R5	-0.075427	1.32549e-12	0.0106209	0.00554589	Social & community context
	Marital_history_R4	0.036527	1.34676e-12	0.00514499	0.00554242	Social & community context
	Smoke_now_R5	0.236581	3.82883e-12	0.0340264	0.00531704	Health behaviors
	Marital_history_R5	0.0314763	4.8195e-12	0.00454848	0.00526741	Social & community context
	RealEstate_own1_R4	-0.155958	5.04985e-12	0.0225584	0.00525731	Economic stability
	Depression_GPS	0.0724041	5.4146e-12	0.0104879	0.00524203	PGS
	Alcohol_live_R5	-0.213997	5.58029e-12	0.0310173	0.0052358	Environmental stressors
	Support_sick_R5	-0.0726001	6.32929e-12	0.0105504	0.00520864	Social & community context
	Sports_heavy_R4	-0.0719465	1.10675e-11	0.0105791	0.00508814	Health behaviors
	Household_Income_R3	-0.0717164	1.31179e-11	0.0105837	0.00504609	Economic stability
	Social_church1_R4	-0.0710812	1.76161e-11	0.0105568	0.00498797	Social & community context
	Marital_status_R4	0.0696204	2.06764e-11	0.010376	0.00495345	Social & community context
	HealthInsurance_num_public_R5	0.0782767	3.94618e-11	0.0118345	0.00481425	Healthcare access & quality
	Social_involvement_R5	-0.0692431	4.55544e-11	0.0105026	0.00478333	Social & community context
	Vehicle_value1_R4	-0.0691457	4.96141e-11	0.0105082	0.00476492	Economic stability
	Social_profesional_R3	-0.0699793	6.21956e-11	0.0106899	0.00471121	Social & community context
	BadExperience_R5	0.0684212	7.77915e-11	0.0105059	0.00466812	Environmental stressors
	Retirement_change_expect_R4	-0.0671741	1.72076e-10	0.0105094	0.00449725	Work characteristics
	Social_num_R3	-0.0673728	1.92733e-10	0.0105693	0.00446807	Social & community context
	Work_dangerous_freq_R4	0.0678525	2.08851e-10	0.0106653	0.00445559	Work characteristics
	Hobby_museum_R5	-0.0667048	3.02514e-10	0.0105803	0.00437593	Health behaviors
	Work_stand_R5	0.0660147	3.4121e-10	0.0105021	0.00435006	Work characteristics
	Work_enoughtime_R5	-0.0660088	3.60693e-10	0.0105157	0.00433812	Work characteristics
	Social_involvement_R3	-0.0661484	3.67793e-10	0.010543	0.00432926	Social & community context
	Social_involvement_R3	-0.0661484	3.67793e-10	0.010543	0.00432926	Social & community context
	Social_business_R5	-0.0656277	4.72923e-10	0.0105262	0.00427988	Social & community context
	FutureChance_losejob_R4	0.0646936	7.9882e-10	0.0105162	0.00416722	Work characteristics
	Smoke_work_R5	0.149893	1.05382e-09	0.0245423	0.00410774	Health behaviors
	Work_hectic_R5	0.0641958	1.193e-09	0.0105453	0.0040811	Work characteristics
	Social_charity_R5	-0.0635517	1.67174e-09	0.0105338	0.00400866	Social & community context
	Pension_ira_R5	-0.128734	1.90296e-09	0.0214125	0.00398086	Economic stability
	Home_own1_R4	-0.168976	2.33428e-09	0.0282628	0.00393699	Economic stability
	Social_charity_R4	-0.0629413	2.49218e-09	0.0105464	0.00392295	Social & community context
	EA_GPS	-0.0626198	2.51191e-09	0.0104948	0.00392108	PGS
	Work_dangerous_level_R4	0.0637469	2.57467e-09	0.010691	0.00391596	Work characteristics
	Religion_attendance_R4	-0.0628972	3.18346e-09	0.0106106	0.00387043	Social & community context
	Alcohol_live_R4	0.191255	6.52689e-09	0.0329281	0.00371649	Environmental stressors
	Spouse_Wage1_R4	-0.062915	1.13056e-08	0.0110083	0.0035988	Economic stability
	Work_coworker_listen_R5	-0.0604724	1.16408e-08	0.0105902	0.00359257	Work characteristics
	Work_deciderate_R5	-0.0601537	1.34077e-08	0.0105792	0.00356231	Work characteristics
	Caregiving_give_advice_R5	-0.0592869	2.13375e-08	0.0105759	0.00346287	Social & community context
	Pension_annuity_R5	-0.180695	2.24876e-08	0.0322859	0.00345163	Economic stability
	Vehicle_equity1_R5	-0.0589055	2.31425e-08	0.0105344	0.00344549	Economic stability
	Social_church1_R5	-0.059397	2.52562e-08	0.0106514	0.0034268	Social & community context
	Social_num2_R3	-0.0584865	2.7483e-08	0.010516	0.00340505	Social & community context
	Work_read_R4	-0.0584654	2.81117e-08	0.0105197	0.00340386	Work characteristics
	Work_boss_talk_R5	-0.0577873	4.41713e-08	0.0105489	0.00330728	Work characteristics
	Household_Income1_R5	-0.0575783	5.03634e-08	0.0105558	0.00327924	Economic stability
	Childhood_head_edu_R3	-0.0581789	5.37241e-08	0.0106885	0.00326192	Economic stability
	Work_wait_R5	0.0569257	8.02231e-08	0.0105986	0.00317981	Work characteristics
	Work_decidetask_R5	-0.0563485	8.99286e-08	0.0105317	0.00315543	Work characteristics
	Support_social_R5	0.133323	9.41527e-08	0.0249574	0.00314564	Social & community context
	Marital_status_R5	0.0499482	1.21611e-07	0.0094325	0.00309103	Social & community context
	Personal_Wage_R3	-0.0664565	1.27756e-07	0.0125715	0.0030772	Economic stability
	Pension_employer_R4	0.120861	1.31513e-07	0.0228862	0.00307431	Economic stability
	Vehicle_value1_R5	-0.0547776	2.11592e-07	0.0105486	0.00297295	Economic stability
	Smoke_household_R5	0.176707	2.2627e-07	0.0341109	0.00295865	Health behaviors
	Work_dangerous_R4	0.116347	2.39406e-07	0.0225053	0.00294661	Work characteristics
	Household_OthAssets_own1_R5	-0.155075	2.49563e-07	0.0300417	0.00293778	Economic stability
	RealEstate_value1_R4	-0.0541775	2.7489e-07	0.0105326	0.00291717	Economic stability
	Work_decideinterrupt_R5	-0.0540367	3.15256e-07	0.0105583	0.00288802	Work characteristics
	Social_neighborhood_R5	-0.0536462	3.41086e-07	0.0105126	0.00287125	Social & community context
	Work_boss_listen_R5	-0.0530131	5.35557e-07	0.0105672	0.00277525	Work characteristics
	Work_boss_rely_R5	-0.0529373	5.55795e-07	0.0105672	0.00276737	Work characteristics
	Spouse_Pension_employer_R4	0.108103	8.99159e-07	0.0219903	0.00266512	Economic stability
	Pension_401k_R5	-0.114778	1.18065e-06	0.0236064	0.00260731	Economic stability
	MDD_GPS	0.0500281	1.93361e-06	0.0105027	0.00250255	PGS
	Sports_heavy_hours_R5	-0.0498981	2.10366e-06	0.010513	0.00248482	Health behaviors
	Household_Assets1_R5	-0.0498	2.34778e-06	0.010542	0.00246156	Economic stability
	Smoke_ever_R4	0.100692	2.34883e-06	0.0213154	0.00246144	Health behaviors
	Work_learnnew_R4	-0.0485939	3.97286e-06	0.0105281	0.00235021	Work characteristics
	Social_countryclub_R4	-0.0485398	4.24124e-06	0.0105475	0.00233639	Social & community context
	RetirementPlan_own_R5	0.105837	4.71974e-06	0.0231102	0.0023138	Economic stability
	Household_CDs_own1_R5	-0.101906	5.64079e-06	0.0224356	0.00227614	Economic stability
	Social_pta_R3	-0.0482821	5.74652e-06	0.010639	0.00226977	Social & community context
	Pension_value1_R5	-0.0481248	7.83564e-06	0.0107608	0.00220676	Economic stability
	IQ_GPS	-0.0467399	8.70142e-06	0.010504	0.00218454	PGS
	Support_social_R4	-0.121765	9.29356e-06	0.0274521	0.00217075	Social & community context
	Work_read_R5	-0.0457196	1.46715e-05	0.0105443	0.00207458	Work characteristics
	Computer_within5_R5	-0.158313	1.55154e-05	0.0366159	0.00206282	Health behaviors
	Social_political_R4	-0.045168	1.78163e-05	0.0105214	0.00203371	Social & community context
	IndustryCode1990_Major_R5	-0.0141186	1.83279e-05	0.00329363	0.00202777	Work characteristics
	Social_countryclub_R5	-0.0451642	1.93358e-05	0.0105654	0.00201652	Social & community context
	Personal_Income1_R5	-0.0447782	2.45961e-05	0.0106092	0.00196596	Economic stability
	Caregiving_give_advice_R4	-0.0445059	2.68055e-05	0.0105936	0.00194789	Social & community context
	RealEstate_loan1_R4	-0.0425956	5.23008e-05	0.0105251	0.00180782	Economic stability
	Social_youth_R3	-0.042603	5.18429e-05	0.0105215	0.00180772	Social & community context
	Hobby_heavyphysical_alone_R5	-0.042384	5.70731e-05	0.0105262	0.00178957	Health behaviors
	Smoke_regularly_ever_R5	0.0845851	7.39012e-05	0.0213318	0.00173557	Health behaviors
	CP_GPS	-0.0402671	0.000127755	0.010507	0.00162138	PGS
	Vehicle_own1_R4	-0.127953	0.00017019	0.0340194	0.00156182	Economic stability
	IndustryCode1990_Census_R5	-0.000156301	0.000173477	4.16095e-05	0.00155786	Work characteristics
	Sibling_close_R5	-0.0395357	0.000178354	0.0105445	0.0015521	Social & community context
	Childhood_ELS_R5	0.0391298	0.000203361	0.0105291	0.00152487	Environmental stressors
	Insomnia_GPS	0.0387229	0.000230022	0.0105082	0.00149925	PGS
	Social_friends_R4	-0.0389912	0.000233011	0.0105905	0.00149664	Social & community context
	Hobby_heavyphysical_tog_R5	-0.038607	0.000243301	0.0105176	0.0014877	Health behaviors
	Childhood_head_DuncanSEI_R3	-0.0388962	0.000242843	0.010595	0.00148648	Economic stability
	Personal_Income_R3	-0.0452601	0.000280094	0.012453	0.00145697	Economic stability
	Childhood_head_SiePrestige_R3	-0.0381744	0.000301261	0.0105582	0.00144191	Economic stability
	Social_pta_R4	-0.0377463	0.000375128	0.0106078	0.00139814	Social & community context
	Alcohol_childhood_R5	-0.097475	0.000407075	0.0275604	0.00138128	Environmental stressors
	SocialSecurity_own1_R5	0.0945623	0.000442187	0.0269037	0.00136422	Economic stability
	Work_hours_R4	-0.0393497	0.000464347	0.0112369	0.00135413	Work characteristics
	Pension_other_R4	0.11026	0.00057898	0.032029	0.00130871	Economic stability
	Hobby_lightphysical_tog_R5	-0.0357374	0.000677815	0.0105123	0.00127633	Health behaviors
	OtherLoan_own1_R5	0.120952	0.000690121	0.0356301	0.00127264	Economic stability
	HealthInsurance_employer_R4	-0.0763308	0.000931152	0.0230492	0.00121123	Healthcare access & quality
	Childhood_head_occup_edu_R3	-0.0350512	0.00095894	0.0106107	0.00120392	Economic stability
	Religion_attendance_R3	-0.0352052	0.000961508	0.0106597	0.00120337	Social & community context
	Social_hobby_R5	-0.0343581	0.00114142	0.0105581	0.00116961	Social & community context
	Work_easyleave_R5	-0.0344022	0.00122255	0.0106357	0.00115559	Work characteristics
	Social_business_R3	-0.0341693	0.00127142	0.0106005	0.00114636	Social & community context
	Sibling_close_R4	-0.0337671	0.00144503	0.010597	0.00112151	Social & community context
	Childhood_head_occup_income_R3	-0.0336226	0.00146586	0.0105653	0.0011174	Economic stability
	Subsidy_own1_R5	0.212897	0.00156686	0.0673092	0.00110504	Economic stability
	Childhood_head_occup_census_R3	0.000147853	0.00158735	4.68011e-05	0.00110121	Economic stability
	Hobby_phone_R5	0.033929	0.00164723	0.0107767	0.00109487	Health behaviors
	Household_Investments1_R4	-0.0326318	0.00191826	0.0105144	0.00106393	Economic stability
	Social_union_R3	0.033644	0.0019355	0.0108498	0.00106097	Social & community context
	Social_church_R3	-0.0323668	0.00225416	0.0105933	0.00103012	Social & community context
	RealEstate_equity1_R5	-0.0320819	0.00234161	0.0105395	0.00102353	Economic stability
	Social_countryclub_R3	-0.0318286	0.00253233	0.0105382	0.00100661	Social & community context
	Social_veteran_R5	0.0321116	0.0025843	0.0106536	0.00100359	Social & community context
	GenHappiness_GPS	-0.0313378	0.00287585	0.0105107	0.000981964	PGS
	Work_people_R4	-0.0312731	0.00297533	0.0105258	0.000975151	Work characteristics
	Social_relatives_R5	-0.0312462	0.00318328	0.010591	0.000961545	Social & community context
	Home_loan1_R4	-0.0313291	0.00337786	0.0106857	0.000949597	Economic stability
	Social_veteran_R4	0.0311082	0.00347023	0.0106409	0.00094417	Social & community context
	Work_boss_help_R5	-0.0301634	0.0044522	0.0106025	0.000894173	Work characteristics
	Business_own1_R5	-0.0795376	0.00477276	0.028178	0.00088026	Economic stability
	Household_Savings1_R4	-0.0297425	0.00479885	0.0105435	0.000879164	Economic stability
	Caregiving_get_health_R4	0.199971	0.00530733	0.0717144	0.000859044	Social & community context
	ASP_GPS	-0.0291166	0.00562409	0.0105129	0.000847443	PGS
	Marital_history_R3	0.0345592	0.00561287	0.0124751	0.000846971	Social & community context
	Family_father_close_R4	-0.0291199	0.00576397	0.0105447	0.000842584	Social & community context
	Caregiving_get_weeks_R4	0.0287818	0.00620434	0.0105142	0.000827925	Social & community context
	Social_neighborhood_R4	-0.0284812	0.00680356	0.0105216	0.000809598	Social & community context
	Personal_Wage1_R4	-0.0284714	0.00729743	0.0106095	0.000795692	Economic stability
	Home_loan1_R5	-0.0283556	0.00828883	0.0107381	0.000770473	Economic stability
	Work_concentration2_R5	-0.0278072	0.00850646	0.0105656	0.00076535	Work characteristics
	OtherLoan_value1_R4	0.0276537	0.00864645	0.0105295	0.00076212	Economic stability
	Spouse_Insurance_reward1_R5	-0.0276071	0.00915267	0.0105901	0.000750893	Economic stability
	Work_nodemand_R5	-0.0274538	0.00924579	0.0105454	0.000748897	Work characteristics
	Household_Stocks_value1_R5	-0.0272724	0.00969521	0.0105418	0.000739541	Economic stability
	Work_paidvacation_days_R4	-0.0275167	0.00974414	0.0106434	0.000738545	Work characteristics
	HealthInsurance_other_R4	0.10678	0.0101599	0.0415346	0.000730318	Healthcare access & quality
	Social_sport_R3	-0.027248	0.0101319	0.0105947	0.00073008	Social & community context
	Social_charity_R3	-0.0270087	0.0104289	0.0105428	0.000724401	Social & community context
	PTSD_GPS	0.0268911	0.0105366	0.0105116	0.000723126	PGS
	Health_cost_R5	0.0268384	0.0108171	0.0105286	0.000718001	Healthcare access & quality
	Caregiving_give_health_R4	0.0838382	0.0108667	0.0329102	0.000717096	Social & community context
	Hobby_repair_R5	-0.0275575	0.0114549	0.0108965	0.000706753	Health behaviors
	HealthInsurance_private_R4	0.0790549	0.0171064	0.0331487	0.000628517	Healthcare access & quality
	AD_GPS	0.0250257	0.0173124	0.010513	0.000626169	PGS
	Family_father_R4	-0.0584915	0.0174238	0.0245961	0.000624953	Social & community context
	Vehicle_own1_R5	-0.205585	0.0193959	0.0879226	0.000604212	Economic stability
	OtherLoan_own1_R4	0.0893634	0.0201387	0.0384497	0.000596954	Economic stability
	Doctor_years_R5	-0.0244965	0.020297	0.0105533	0.000595448	Healthcare access & quality
	Anxiety_GPS	0.0243655	0.0204868	0.0105127	0.000593623	PGS
	Social_political_R3	-0.0242743	0.0211974	0.0105318	0.000586452	Social & community context
	Childhood_head_occup_major_R3	0.00577129	0.0213974	0.00250784	0.000584646	Economic stability
	Smoker_GPS	0.0241478	0.0216658	0.0105147	0.000582847	PGS
	Social_relatives_R4	-0.0242973	0.0219858	0.0106055	0.000580054	Social & community context
	Work_hourlywage_R4	-0.0243943	0.0227821	0.0107112	0.000573216	Economic stability
	Social_veteran_R3	0.0236537	0.0252448	0.0105691	0.000552947	Social & community context
	Alcohol_childhood_R4	0.0634223	0.0272993	0.0287295	0.000538594	Environmental stressors
	Family_mother_close_R5	-0.0232086	0.0279494	0.0105573	0.000534111	Social & community context
	Social_union_R5	0.0229965	0.0302608	0.0106121	0.000518994	Social & community context
	Work_num_R4	-0.0226471	0.0317172	0.0105419	0.000510071	Work characteristics
	Social_sport_R5	-0.0222488	0.0353474	0.0105711	0.000489582	Social & community context
	Social_sport_R4	-0.0222359	0.0362792	0.0106184	0.000484674	Social & community context
	Household_CDs_value1_R5	-0.0218954	0.037422	0.0105194	0.000478837	Economic stability
	Family_father_contact_R4	-0.0219006	0.0375574	0.0105293	0.000478155	Social & community context
	Sports_light_hours_R5	-0.0222073	0.0378507	0.0106932	0.000476695	Health behaviors
	OtherLoan_value1_R5	0.0215275	0.0419512	0.0105823	0.000457402	Economic stability
	Caregiving_give_weeks_R4	0.0213703	0.0428451	0.0105506	0.000453456	Social & community context
	Childhood_head_classwork_R3	-0.0172684	0.0437186	0.00856115	0.000449205	Economic stability
	Hobby_bar_R5	0.0210363	0.0456948	0.0105261	0.000441445	Health behaviors
	Caregiving_get_hours_R4	0.0210219	0.0458762	0.0105278	0.000440704	Social & community context
	Social_youth_R4	-0.0204706	0.0531422	0.0105845	0.000413436	Social & community context
	Smoke_childhood_R5	0.0480253	0.055766	0.0251033	0.00040455	Environmental stressors
	Family_num_R4	-0.0206962	0.057046	0.0108744	0.000400371	Social & community context
	Household_Investments1_R5	-0.019925	0.0583806	0.0105252	0.000396123	Economic stability
	Marital_status_R3	0.0457515	0.0594851	0.0242735	0.00039226	Social & community context
	Business_loan1_R5	-0.0197505	0.0604771	0.0105194	0.000389651	Economic stability
	Personal_Profit_value1_R4	-0.0190993	0.0714415	0.0105938	0.000359286	Economic stability
	Sibling_contact_R5	-0.0190772	0.0714458	0.0105817	0.000359278	Social & community context
	Social_neighborhood_R3	-0.0189555	0.0718033	0.0105275	0.000357988	Social & community context
	Social_community_R4	-0.0187256	0.0754358	0.0105317	0.000349449	Social & community context
	Business_value1_R5	-0.018708	0.0756616	0.01053	0.000348912	Economic stability
	RiskTOL_GPS	0.0186217	0.0765802	0.0105143	0.000346718	PGS
	Social_political_R5	-0.0186292	0.0767918	0.0105261	0.000346238	Social & community context
	Pension_other_R5	-0.0545686	0.0780696	0.0309662	0.000343265	Economic stability
	Social_friends_R3	-0.0186064	0.0787787	0.0105837	0.00034127	Social & community context
	ED_GPS	0.018224	0.083085	0.0105143	0.000332068	PGS
	Childhood_head_ind_census_R3	-7.17939e-05	0.083197	4.14365e-05	0.000331486	Economic stability
	Spouse_Retirement_R4	-0.0296332	0.0848787	0.0171961	0.00032826	Work characteristics
	Risk4PC_GPS	0.0181122	0.0850015	0.0105146	0.000327987	PGS
	Spouse_Profit_own1_R4	-0.0629536	0.0860624	0.0366706	0.000325785	Economic stability
	Sp_SocialSecurity_own1_R5	0.0413507	0.0895157	0.0243506	0.000318771	Economic stability
	Hobby_letters_R5	0.0177692	0.0947017	0.0106321	0.000308768	Health behaviors
	Work_noexcessive_R5	-0.0176181	0.0949101	0.0105483	0.000308379	Work characteristics
	Caregiving_give_hours_R4	0.017488	0.0981301	0.0105721	0.000302475	Social & community context
	Household_OthAssets_value1_R5	-0.0173357	0.0994197	0.0105203	0.000300172	Economic stability
	HealthCare_internet_R5	-0.0353403	0.111657	0.0222134	0.000279807	Healthcare access & quality
	Training_num_R3	0.016726	0.11221	0.0105295	0.000278645	Educational access & quality
	Social_hobby_R4	-0.0165898	0.115235	0.0105315	0.000274312	Social & community context
	Sp_SocialSecurity_value1_R5	-0.0187293	0.11678	0.0119402	0.000271998	Economic stability
	Business_equity1_R5	-0.0160903	0.126552	0.0105304	0.000258104	Economic stability
	Family_mother_R5	-0.0400383	0.129918	0.0264355	0.000253591	Social & community context
	Cross_GPS	0.0159217	0.129982	0.0105142	0.000253493	PGS
	Personal_Insurance_reward1_R5	-0.0158634	0.136258	0.0106465	0.000245436	Economic stability
	Marital_age_R4	0.0154946	0.145716	0.0106495	0.000234027	Social & community context
	Hobby_craft_R5	-0.0151993	0.149744	0.010551	0.00022942	Health behaviors
	LaborForce_status_R3	0.01448	0.156564	0.0102199	0.000221691	Work characteristics
	Personal_Profit_own1_R4	-0.0438046	0.157579	0.0309928	0.000220846	Economic stability
	Sibling_R4	-0.084238	0.166135	0.0608287	0.000212019	Social & community context
	Pension_employer_R5	0.0299813	0.166156	0.0216506	0.000212	Economic stability
	Household_Cash_value1_R5	-0.0143331	0.174046	0.0105435	0.00020431	Economic stability
	Family_father_R5	0.0631108	0.202315	0.0494957	0.000179748	Social & community context
	Business_own1_R4	-0.033234	0.203517	0.0261337	0.000178793	Economic stability
	Work_firmsize_R4	-0.0131625	0.212583	0.0105588	0.000171805	Work characteristics
	Hobby_read_R5	-0.0130265	0.221342	0.0106508	0.000165382	Health behaviors
	Doctor_office_R5	-0.0698057	0.223564	0.0573498	0.000163801	Healthcare access & quality
	Childhood_bothparents_R3	0.0488123	0.234194	0.0410289	0.000156319	Economic stability
	Childhood_head_indust_major_R3	-0.00475862	0.248816	0.00412607	0.000146902	Economic stability
	Social_community_R3	0.0121021	0.250843	0.0105384	0.000145649	Social & community context
	BIP_GPS	0.0120538	0.251927	0.0105204	0.000145134	PGS
	RealEstate_value1_R5	-0.0115358	0.273086	0.0105249	0.000132823	Economic stability
	SCZ_GPS	0.0113326	0.281166	0.0105149	0.000128423	PGS
	Social_other1_R3	-0.0112916	0.28438	0.010547	0.000126589	Social & community context
	Social_union_R4	0.0112848	0.28717	0.0106019	0.000125266	Social & community context
	Sibling_R5	-0.037607	0.291911	0.0356803	0.000122828	Social & community context
	Doctor_R5	-0.0621495	0.339219	0.0650263	0.000101	Healthcare access & quality
	Hobby_lightphysical_alone_R5	-0.00998776	0.353068	0.0107545	9.53634e-05	Health behaviors
	Hobby_movie_R5	0.00967164	0.359342	0.0105509	9.29079e-05	Health behaviors
	Spouse_Subsidy_own1_R5	0.0910318	0.369712	0.101478	8.89757e-05	Economic stability
	Social_nationality_R4	-0.00950178	0.370022	0.010599	8.88603e-05	Social & community context
	OCD_GPS	0.00940665	0.371105	0.0105167	8.84548e-05	PGS
	Work_paidvacation_R4	-0.0210227	0.373277	0.0236105	8.76588e-05	Work characteristics
	Hobby_music_R5	-0.00931376	0.37677	0.010537	8.63863e-05	Health behaviors
	LaborForce_MajorActivity_R3	0.00753593	0.396039	0.00887878	7.95673e-05	Work characteristics
	Pension_own1_R5	0.0176758	0.425681	0.0221879	7.01721e-05	Economic stability
	HealthInsurance_num_R5	-0.00869345	0.430964	0.0110382	6.85848e-05	Healthcare access & quality
	Cannabis_GPS	0.00795217	0.449567	0.0105164	6.32208e-05	PGS
	Family_mother_R4	-0.0156698	0.462868	0.0213438	5.95973e-05	Social & community context
	Business_value1_R4	0.00767989	0.465568	0.0105241	5.88814e-05	Economic stability
	Work_insurance_R5	-0.0155101	0.483926	0.0221562	5.41854e-05	Work characteristics
	Social_fraternal_R5	-0.00725239	0.494035	0.0106039	5.1722e-05	Social & community context
	Children_num_R4	0.00729963	0.496133	0.0107251	5.12209e-05	Social & community context
	Hobby_art_R5	0.00710101	0.501091	0.0105544	5.00519e-05	Health behaviors
	Family_father_close_R5	-0.00682578	0.517231	0.0105394	4.63794e-05	Social & community context
	Work_hard_R5	0.0067694	0.520778	0.0105414	4.55988e-05	Work characteristics
	Vehicle_loan1_R5	0.00677719	0.520873	0.010556	4.5578e-05	Economic stability
	Work_people_R5	-0.00653753	0.534647	0.0105282	4.26352e-05	Work characteristics
	AlcoholDEP_GPS	0.00632972	0.547221	0.0105153	4.0064e-05	PGS
	Spouse_Profit_value1_R4	-0.00624999	0.553412	0.0105454	3.88407e-05	Economic stability
	Vehicle_loan1_R4	-0.0061252	0.561283	0.0105433	3.732e-05	Economic stability
	Social_other2_R3	-0.00608736	0.563287	0.010532	3.68997e-05	Social & community context
	HealthInsurance_viaSpouse_R4	-0.0121395	0.58585	0.0222793	3.28286e-05	Healthcare access & quality
	Hobby_game_R5	0.00564408	0.593162	0.0105639	3.1564e-05	Health behaviors
	FutureChance_reducetime_R4	-0.00558992	0.595415	0.0105267	3.11805e-05	Work characteristics
	Smoke_ever_R5	0.01393	0.597927	0.0264125	3.07568e-05	Health behaviors
	Personal_Profit_R3	0.00559756	0.59856	0.0106318	3.06176e-05	Economic stability
	Retirement_R5	-0.00681363	0.606778	0.0132382	2.92926e-05	Work characteristics
	Sibling_contact_R4	-0.00535195	0.612561	0.0105678	2.83602e-05	Social & community context
	Spouse_Caregiving_get_weeks_R4	-0.00513909	0.62533	0.0105239	2.6368e-05	Social & community context
	RealEstate_loan1_R5	-0.00492973	0.639458	0.010523	2.42676e-05	Economic stability
	Work_pension_R5	-0.00974584	0.6474	0.0213074	2.31333e-05	Work characteristics
	Personal_Insur_own1_R5	-0.0117645	0.648983	0.0258451	2.29112e-05	Economic stability
	Social_fraternal_R3	-0.00472385	0.656022	0.0106052	2.19151e-05	Social & community context
	Children_num_R5	0.00458083	0.668738	0.0107055	2.02458e-05	Social & community context
	Work_timepressure_R4	0.00415819	0.693092	0.0105357	1.72242e-05	Work characteristics
	ASD_GPS	0.00401648	0.702498	0.0105154	1.61318e-05	PGS
	Employment_ever_R5	0.0286651	0.706028	0.0759927	1.57335e-05	Work characteristics
	LaborForce_weeks_R3	0.00428734	0.722858	0.0120889	1.38932e-05	Work characteristics
	HealthInsurance_type_R5	-0.00225322	0.735812	0.0066779	1.2589e-05	Healthcare access & quality
	Internet_household_R5	-0.0123019	0.784631	0.045013	8.25917e-06	Health behaviors
	Business_loan1_R4	-0.00284897	0.786665	0.0105263	8.10005e-06	Economic stability
	Hobby_puzzle_R5	-0.00257012	0.808205	0.0105876	6.51602e-06	Health behaviors
	Work_interrupt_R5	-0.00247449	0.81444	0.0105428	6.09155e-06	Work characteristics
	Hobby_fish_R5	-0.00246188	0.819284	0.0107754	5.77211e-06	Health behaviors
	Spouse_Caregiving_get_hours_R4	0.00209805	0.841939	0.0105207	4.39747e-06	Social & community context
	Work_weeks_R3	-0.00234578	0.846305	0.0121016	4.15038e-06	Work characteristics
	Family_num_R5	0.0019305	0.857158	0.0107251	3.58265e-06	Social & community context
	Social_community_R5	-0.00179911	0.865054	0.0105862	3.19378e-06	Social & community context
	Social_nationality_R5	0.0015033	0.887215	0.010599	2.22448e-06	Social & community context
	GenHappiness_meaningful_GPS	-0.00133318	0.899118	0.0105157	1.77724e-06	PGS
	Spouse_Subsidy_value1_R5	-0.0010181	0.92291	0.0105206	1.03554e-06	Economic stability
	Work_concentration_R4	-0.000965154	0.927032	0.0105387	9.27445e-07	Work characteristics
	Social_nationality_R3	-0.000931668	0.929964	0.0106001	8.53299e-07	Social & community context
	Social_fraternal_R4	0.000897414	0.932463	0.0105891	7.94212e-07	Social & community context
	Sp_Caregiving_get_health_R4	-0.0136616	0.936557	0.171629	7.00631e-07	Social & community context
	ClassWorker_R5	-0.000644958	0.950172	0.0103205	4.31849e-07	Work characteristics
	Snoring_GPS	-0.000525678	0.96013	0.0105154	2.76336e-07	PGS
	Social_pta_R5	0.00050135	0.962163	0.010568	2.48866e-07	Social & community context
	Childhood_head2_R3	0.00137858	0.962415	0.0292538	2.45302e-07	Economic stability
	Subsidy_value1_R5	0.000364644	0.972357	0.0105226	1.32788e-07	Economic stability
	SocialSecurity_value1_R5	0.000368492	0.974859	0.0116925	1.09828e-07	Economic stability
	Social_youth_R5	-8.89856e-05	0.993259	0.0105321	7.89372e-09	Social & community context
	Drink_GPS	-8.36815e-05	0.993652	0.0105179	6.99915e-09	PGS

## Sheet: Supplementary Table 9
Supplementary Table 9. Depression-related outcomes used for the sensitivity analysis
Round	Module	Stacked Status	Variable Pair	Long Form Variable Name	Variable Label	Details	Coded Variable Name	Variable Type
R6	How You've Felt This Past Week	paired	ju001rec/pu001rec	z_ju001rec	R6 Summary score for psychological distress/depression, Modified CES-D.		Depression_score_R6	Continuous
R6	How You've Felt This Past Week	paired	JU003RER/PU003RER	z_ju003rer	R6 On how many days during the past week did you feel you could not shake off the blues even with help from your family and friends?	0~7	Blue_days_R6	Continuous
R6	Health	paired	HX332RE/KX332RE	z_hx332re	R6 During the past four weeks, would Participant describe self as having felt somewhat unhappy, very unhappy, or so unhappy that life was not worthwhile?	1: Somewhat happy 2: Very unhappy 3. So unhappy that life is not worthwhile	Unhappy_fourweeks_R6	Continuous
R6	Health	paired	HX335RE/KX335RE	z_hx333re	R6 During the past four weeks, did Participant ever feel fretful, angry, irritable, anxious or depressed?	1: Yes 2: No	Depressed_fourweeks_binary_R6	Factor(Binary)
R6	Health	paired	HX334RE/KX334RE	z_hx334re	R6 During the past four weeks, how often did Participant feel fretful, angry, irritable, anxious or depressed?	1: Rarely 2: Occasionally 3: Often 4: Almost always	Depressed_fourweeks_cont_R6	Continuous
R6	Health	paired	HX335RE/KX335RE	z_hx335re	R6 During the past four weeks, did Participant feel extremely fretful, angry, irritable, anxious or depressed, to the point of needing professional help?	1: Yes 2: No	Depressed_fourweeks_advanced_binary_R6	Factor(Binary)
R6	Depression	paired	HU002RE/KU002RE	z_hu002re	R6 Since last interview has Participant had a time lasting two weeks or more when nearly every day they felt sad, blue, depressed, or when they lost interest in most things like work, hobbies, or things they usually liked to do for fun?	1: Yes 2: No	LoseInterest_binary_R6	Factor(Binary)
R6	Depression	paired	HU024RE/KU024RE	z_hu024re	R6 Number of participant's depression symptoms since the time of last interview only includes the seven depression symptoms provided (Z_HU006RE - Z_HU012RE), and does not include other depression symptoms that do not fit under one of those categories. provided	0~7	Depression_num_R6	Continuous
R6	How You've Felt This Past Week	paired	JU013RER/PU013RER	z_ju013rer	R6 On how many days during the past week did you feel depressed?	0~7 (7 depression symptoms)	Depression_days_R6	Continuous
R6	Health	paired	JXSF2REC/PXSF2REC	z_jxsf2rec	R6 SF12 Mental Component Summary Scale.		SF12_mental_R6	Continuous

## Sheet: Supplementary Table 10
Supplementary Table 10. Pearson correlations between 26 PGS and late-life depressive symtoms. ***p-FDR<0.001, **p-FDR<0.01, *p-FDR<0.05
	PGS	Pearson correlation	p-value	p-FDR	Significance
	Neuroticism PGS	0.0887175	3.33232e-17	8.66403e-16	***
	Depression PGS	0.0724923	5.68852e-12	7.39507e-11	***
	EA PGS	-0.0624322	3.03952e-09	2.63425e-08	***
	MDD PGS	0.0506659	1.50671e-06	9.79359e-06	***
	IQ PGS	-0.046459	1.03142e-05	5.36337e-05	***
	CP PGS	-0.0400454	0.00014406	0.00062426	***
	Insomnia PGS	0.0393237	0.000189564	0.000704094	***
	GenHappiness PGS	-0.0318975	0.0024679	0.00802068	**
	ASP PGS	-0.0280473	0.00777486	0.0224607	*
	PTSD PGS	0.0270531	0.0102491	0.0266476	*
	AD PGS	0.0256801	0.014811	0.0348962	*
	Smoker PGS	0.0253592	0.0161059	0.0348962	*
	Anxiety PGS	0.023948	0.0230534	0.0461067	*
	RiskTOL PGS	0.0192345	0.0679758	0.126241	ns
	Risk4PC PGS	0.0188874	0.0730971	0.12637	ns
	ED PGS	0.0185879	0.0777663	0.12637	ns
	Cross PGS	0.0156946	0.136429	0.208656	ns
	SCZ PGS	0.0116337	0.269652	0.389497	ns
	OCD PGS	0.0104385	0.321954	0.430169	ns
	BIP PGS	0.0102473	0.330899	0.430169	ns
	Cannabis PGS	0.00875317	0.406239	0.502963	ns
	AlcoholDEP PGS	0.00609966	0.562758	0.665077	ns
	ASD PGS	0.00426365	0.685813	0.775267	ns
	GenHappiness_meaningful PGS	-0.00182353	0.862636	0.934523	ns
	Drink PGS	0.00125757	0.905021	0.941222	ns
	Snoring PGS	-0.000641105	0.951495	0.951495	ns

[truncated: 5 more sheets: Supplementary Table 11, Supplementary Table 12, Supplementary Table 13, Supplementary Table 14, Supplementary Table 15]
